# Supplementary material for: Global trends and socio-demographic inequalities in the burden of genital neoplasms: a 30-year comprehensive analysis of the Global Burden of Disease Study 2021
Source: Research Square preprint supplement (doi:10.21203/rs.3.rs-6699229/v1), 2025-06-17
Supplement: Supplementary file 1 [file eb23d20f115d6789238931b0.docx]

**Supplementary material**

**Global trends and socio-demographic inequalities in the burden of genital neoplasms: a 30-year comprehensive analysis of the Global Burden of Disease Study 2021**

Binbin Luo, Zuo Shiquan, Rui Zhang, Shenyi Wang *

* Corresponding author：Shenyi Wang

Supplementary Tables S1 to S8

Supplementary Figures S1 to S10

**Table S1. EAPC of the ASIR of 6 genital neoplasms in global, SDI, and 21 regions (1990-2021, 95% CI)**

| Location name | Uterine fibroids | Uterine  cancer | Cervical cancer | Ovarian cancer | Testicular cancer | Prostate cancer |
| --- | --- | --- | --- | --- | --- | --- |
| Andean Latin America | 0.02 (-0.01, 0.04) | 0.41 (0.20, 0.62) | -0.65 (-0.82, -0.47) | 2.12 (1.72, 2.52) | 4.02 (3.46, 4.58) | 1.47 (1.33, 1.62) |
| Australasia | -0.06 (-0.08, -0.04) | 1.38 (1.17, 1.58) | -1.92 (-2.19, -1.66) | -2.21 (-2.58, -1.84) | 0.35 (-0.04, 0.75) | -0.83 (-1.49, -0.16) |
| Caribbean | 0.01 (-0.03, 0.05) | 1.07 (0.79, 1.35) | -0.45 (-0.53, -0.37) | 0.91 (0.73, 1.09) | 5.48 (4.28, 6.69) | 1.30 (1.11, 1.50) |
| Central Asia | 0.21 (0.19, 0.22) | -0.21 (-0.52, 0.10) | -0.45 (-0.61, -0.28) | 1.22 (1.06, 1.38) | 1.40 (0.99, 1.81) | 1.76 (1.42, 2.11) |
| Central Europe | -0.12 (-0.27, 0.03) | 1.37 (1.27, 1.47) | -1.10 (-1.32, -0.88) | 0.00 (-0.17, 0.17) | 2.82 (2.68, 2.96) | 2.27 (2.03, 2.50) |
| Central Latin America | -0.09 (-0.11, -0.08) | 1.51 (1.14, 1.89) | -1.58 (-1.77, -1.40) | 1.38 (1.29, 1.47) | 4.67 (4.49, 4.85) | 1.43 (1.09, 1.77) |
| Central Sub-Saharan Africa | 0.17 (0.14, 0.19) | 0.80 (0.65, 0.94) | -0.17 (-0.20, -0.14) | 1.49 (1.28, 1.70) | 1.44 (1.19, 1.68) | 0.93 (0.77, 1.10) |
| East Asia | 0.19 (0.06, 0.33) | 0.48 (0.16, 0.81) | 0.73 (0.56, 0.90) | -0.35 (-0.49, -0.20) | 2.67 (2.34, 2.99) | 1.93 (1.77, 2.10) |
| Eastern Europe | 0.07 (0.05, 0.09) | 0.91 (0.47, 1.36) | 0.31 (0.19, 0.43) | -0.22 (-0.40, -0.04) | 1.96 (1.65, 2.28) | 3.27 (3.07, 3.48) |
| Eastern Sub-Saharan Africa | 0.12 (0.11, 0.13) | 0.34 (0.22, 0.45) | -1.34 (-1.47, -1.22) | 1.08 (0.99, 1.17) | 2.01 (1.74, 2.27) | 0.59 (0.54, 0.65) |
| Global | 0.24 (0.23, 0.25) | 0.54 (0.50, 0.58) | -0.54 (-0.64, -0.44) | -0.38 (-0.43, -0.32) | 1.42 (1.35, 1.49) | -0.06 (-0.21, 0.08) |
| High SDI | 0.07 (-0.10, 0.24) | 1.36 (1.27, 1.45) | -1.41 (-1.57, -1.25) | -1.21 (-1.33, -1.09) | 0.88 (0.71, 1.05) | -0.36 (-0.53, -0.20) |
| High-income Asia Pacific | 0.15 (0.03, 0.28) | 2.46 (2.33, 2.59) | 0.02 (-0.09, 0.13) | -0.01 (-0.16, 0.15) | 0.48 (-0.03, 1.00) | 2.35 (1.81, 2.89) |
| High-income North America | 0.91 (0.52, 1.30) | 1.66 (1.56, 1.75) | -1.34 (-1.56, -1.12) | -1.33 (-1.51, -1.15) | 1.32 (1.22, 1.43) | -1.25 (-1.38, -1.11) |
| High-middle SDI | -0.29 (-0.34, -0.24) | 0.56 (0.45, 0.67) | 0.21 (0.11, 0.30) | -0.53 (-0.62, -0.45) | 2.75 (2.67, 2.83) | 0.83 (0.62, 1.04) |
| Low SDI | 0.28 (0.25, 0.31) | 0.50 (0.38, 0.62) | -1.17 (-1.29, -1.05) | 1.18 (1.09, 1.28) | 1.07 (0.83, 1.31) | 0.69 (0.61, 0.76) |
| Low-middle SDI | 0.65 (0.59, 0.72) | 0.98 (0.88, 1.09) | -0.78 (-0.93, -0.63) | 1.51 (1.45, 1.58) | 2.19 (2.00, 2.37) | 1.61 (1.48, 1.75) |
| Middle SDI | 0.58 (0.55, 0.61) | 0.53 (0.44, 0.63) | -0.47 (-0.54, -0.39) | 0.73 (0.65, 0.81) | 3.91 (3.70, 4.11) | 1.23 (1.04, 1.42) |
| North Africa and Middle East | -0.02 (-0.08, 0.04) | 2.07 (1.88, 2.26) | -0.73 (-0.78, -0.68) | 1.26 (1.19, 1.32) | 4.35 (4.05, 4.64) | 2.81 (2.72, 2.91) |
| Oceania | 0.18 (0.15, 0.21) | 0.53 (0.47, 0.59) | -0.80 (-0.87, -0.74) | 1.14 (1.01, 1.26) | 0.27 (0.01, 0.54) | 0.76 (0.72, 0.80) |
| South Asia | 0.85 (0.74, 0.96) | 1.03 (0.82, 1.25) | -1.48 (-1.81, -1.14) | 1.37 (1.27, 1.46) | 1.66 (1.37, 1.96) | 0.97 (0.82, 1.12) |
| Southeast Asia | 0.18 (0.14, 0.21) | 0.93 (0.87, 0.98) | -0.78 (-0.89, -0.67) | 1.39 (1.27, 1.50) | 2.48 (2.39, 2.56) | 1.87 (1.81, 1.93) |
| Southern Latin America | 0.11 (-0.01, 0.22) | -0.07 (-0.21, 0.07) | -0.22 (-0.38, -0.05) | -0.25 (-0.43, -0.08) | 3.49 (3.13, 3.84) | 0.86 (0.47, 1.26) |
| Southern Sub-Saharan Africa | 0.04 (0.01, 0.06) | 2.37 (2.11, 2.63) | 1.89 (1.39, 2.40) | 1.61 (1.47, 1.74) | 1.20 (1.07, 1.33) | 1.41 (1.26, 1.56) |
| Tropical Latin America | 1.40 (1.30, 1.50) | 0.34 (0.16, 0.52) | -0.85 (-1.02, -0.67) | 0.20 (0.09, 0.32) | 3.90 (3.75, 4.06) | 0.95 (0.58, 1.33) |
| Western Europe | -0.05 (-0.11, 0.01) | 1.41 (1.23, 1.59) | -1.27 (-1.49, -1.05) | -1.35 (-1.44, -1.25) | 1.06 (0.80, 1.31) | 0.41 (0.06, 0.77) |
| Western Sub-Saharan Africa | 0.09 (0.06, 0.13) | 1.27 (1.22, 1.32) | -0.24 (-0.28, -0.20) | 1.59 (1.50, 1.68) | 0.33 (0.14, 0.52) | 1.25 (1.20, 1.31) |

The location name is in alphabetical order. EAPC estimated annual percentage change, ASIR age-standardized incidence rate, CI confidence interval.

**Table S2. EAPC of the ASPR of 6 genital neoplasms in global, SDI, and 21 regions (1990-2021, 95% CI)**

| Location name | Uterine fibroids | Uterine  cancer | Cervical cancer | Ovarian cancer | Testicular cancer | Prostate cancer |
| --- | --- | --- | --- | --- | --- | --- |
| Andean Latin America | 0.04 (0.01, 0.06) | 0.88 (0.66, 1.10) | 0.46 (0.29, 0.63) | 2.74 (2.29, 3.19) | 9.73 (8.97, 10.48) | 2.76 (2.53, 3.00) |
| Australasia | -0.06 (-0.08, -0.05) | 1.64 (1.45, 1.83) | -1.45 (-1.72, -1.17) | -2.04 (-2.46, -1.62) | 0.51 (0.08, 0.93) | -0.10 (-0.78, 0.59) |
| Caribbean | 0.04 (0.01, 0.07) | 1.13 (0.83, 1.43) | 0.00 (-0.11, 0.11) | 1.17 (0.94, 1.39) | 6.95 (5.62, 8.30) | 1.77 (1.56, 1.99) |
| Central Asia | 0.21 (0.19, 0.22) | -0.06 (-0.37, 0.24) | -0.04 (-0.23, 0.15) | 1.30 (1.14, 1.47) | 2.71 (2.08, 3.35) | 2.10 (1.75, 2.45) |
| Central Europe | -0.12 (-0.24, -0.01) | 1.62 (1.53, 1.71) | -0.64 (-0.92, -0.36) | 0.09 (-0.11, 0.29) | 3.81 (3.61, 4.01) | 3.27 (2.99, 3.55) |
| Central Latin America | -0.12 (-0.14, -0.09) | 2.05 (1.68, 2.41) | -0.57 (-0.74, -0.40) | 1.89 (1.78, 1.99) | 9.08 (8.81, 9.35) | 1.94 (1.56, 2.32) |
| Central Sub-Saharan Africa | 0.17 (0.14, 0.20) | 1.14 (0.95, 1.33) | 0.39 (0.28, 0.50) | 1.84 (1.58, 2.10) | 4.58 (3.96, 5.20) | 1.79 (1.55, 2.03) |
| East Asia | 0.02 (-0.13, 0.16) | 1.02 (0.66, 1.38) | 2.23 (2.04, 2.43) | 0.37 (0.25, 0.48) | 6.72 (6.44, 7.01) | 3.75 (3.57, 3.92) |
| Eastern Europe | 0.06 (0.05, 0.08) | 1.04 (0.58, 1.50) | 1.28 (1.13, 1.43) | -0.14 (-0.31, 0.03) | 2.72 (2.38, 3.05) | 3.73 (3.44, 4.01) |
| Eastern Sub-Saharan Africa | 0.12 (0.11, 0.13) | 0.75 (0.62, 0.88) | -0.74 (-0.88, -0.60) | 1.49 (1.37, 1.60) | 5.21 (4.63, 5.79) | 1.68 (1.58, 1.78) |
| Global | 0.04 (0.03, 0.06) | 0.77 (0.72, 0.82) | 0.12 (0.03, 0.21) | -0.07 (-0.13, 0.00) | 1.80 (1.71, 1.89) | 0.42 (0.26, 0.58) |
| High SDI | -0.11 (-0.23, 0.02) | 1.56 (1.48, 1.64) | -1.06 (-1.22, -0.91) | -0.94 (-1.10, -0.78) | 1.05 (0.86, 1.25) | 0.14 (-0.04, 0.33) |
| High-income Asia Pacific | -0.09 (-0.17, -0.01) | 2.90 (2.73, 3.07) | 0.75 (0.62, 0.89) | 0.55 (0.31, 0.79) | 0.65 (0.11, 1.19) | 3.02 (2.45, 3.58) |
| High-income North America | 0.39 (0.14, 0.63) | 1.78 (1.69, 1.87) | -1.25 (-1.48, -1.03) | -1.30 (-1.49, -1.11) | 1.41 (1.30, 1.52) | -0.86 (-0.98, -0.73) |
| High-middle SDI | -0.52 (-0.56, -0.47) | 0.77 (0.65, 0.89) | 1.13 (1.02, 1.25) | -0.22 (-0.29, -0.15) | 3.73 (3.60, 3.85) | 1.52 (1.31, 1.72) |
| Low SDI | 0.32 (0.28, 0.35) | 0.84 (0.70, 0.98) | -0.63 (-0.77, -0.48) | 1.53 (1.42, 1.64) | 4.43 (4.01, 4.85) | 1.56 (1.46, 1.66) |
| Low-middle SDI | 0.66 (0.60, 0.73) | 1.33 (1.21, 1.44) | -0.12 (-0.28, 0.03) | 1.88 (1.81, 1.94) | 5.46 (5.23, 5.69) | 2.66 (2.51, 2.80) |
| Middle SDI | 0.44 (0.41, 0.47) | 0.95 (0.85, 1.05) | 0.53 (0.46, 0.59) | 1.24 (1.16, 1.31) | 7.08 (6.93, 7.23) | 2.24 (2.03, 2.45) |
| North Africa and Middle East | -0.01 (-0.07, 0.05) | 2.34 (2.16, 2.51) | -0.14 (-0.19, -0.08) | 1.63 (1.55, 1.70) | 4.68 (4.39, 4.96) | 3.86 (3.73, 4.00) |
| Oceania | 0.18 (0.15, 0.21) | 0.60 (0.52, 0.69) | -0.73 (-0.84, -0.62) | 1.38 (1.23, 1.53) | 0.87 (0.53, 1.20) | 1.21 (1.16, 1.25) |
| South Asia | 0.88 (0.76, 0.99) | 1.50 (1.28, 1.73) | -0.76 (-1.10, -0.42) | 1.77 (1.68, 1.86) | 5.57 (5.22, 5.92) | 2.31 (2.16, 2.45) |
| Southeast Asia | 0.18 (0.14, 0.21) | 1.15 (1.09, 1.21) | -0.24 (-0.37, -0.10) | 1.83 (1.69, 1.97) | 4.99 (4.79, 5.20) | 2.92 (2.86, 2.98) |
| Southern Latin America | 0.11 (-0.01, 0.24) | 0.17 (0.03, 0.32) | 0.39 (0.21, 0.57) | 0.18 (-0.02, 0.38) | 4.76 (4.24, 5.29) | 1.83 (1.41, 2.24) |
| Southern Sub-Saharan Africa | 0.04 (0.01, 0.07) | 2.45 (2.26, 2.65) | 1.97 (1.44, 2.50) | 1.55 (1.44, 1.67) | 3.21 (2.72, 3.71) | 1.99 (1.91, 2.06) |
| Tropical Latin America | 1.02 (0.93, 1.11) | 0.72 (0.52, 0.91) | 0.05 (-0.16, 0.25) | 0.59 (0.48, 0.69) | 6.98 (6.75, 7.20) | 1.71 (1.30, 2.13) |
| Western Europe | -0.05 (-0.11, 0.01) | 1.58 (1.38, 1.79) | -0.87 (-1.06, -0.68) | -1.13 (-1.27, -0.98) | 1.25 (0.97, 1.54) | 1.13 (0.73, 1.54) |
| Western Sub-Saharan Africa | 0.10 (0.07, 0.14) | 1.48 (1.42, 1.54) | 0.05 (-0.00, 0.11) | 1.84 (1.72, 1.95) | 2.71 (2.34, 3.08) | 2.13 (2.03, 2.22) |

The location name is in alphabetical order. EAPC estimated annual percentage change, ASPR age-standardized prevalence rate, CI confidence interval.

**Table S3. EAPC of the ASMR of 6 genital neoplasms in global, SDI, and 21 regions (1990-2021, 95% CI)**

| Location name | Uterine fibroids | Uterine  cancer | Cervical cancer | Ovarian cancer | Testicular cancer | Prostate cancer |
| --- | --- | --- | --- | --- | --- | --- |
| Andean Latin America | -2.73 (-3.23, -2.22) | -1.11 (-1.31, -0.91) | -1.57 (-1.73, -1.42) | 1.77 (1.41, 2.13) | 0.61 (0.14, 1.08) | -0.11 (-0.25, 0.04) |
| Australasia | -6.07 (-9.13, -2.90) | 0.26 (-0.01, 0.52) | -3.21 (-3.44, -2.97) | -2.23 (-2.57, -1.88) | -2.50 (-2.71, -2.30) | -2.74 (-3.07, -2.42) |
| Caribbean | -1.46 (-1.69, -1.24) | 0.71 (0.53, 0.88) | -0.88 (-0.96, -0.80) | 0.79 (0.63, 0.94) | 3.64 (2.70, 4.59) | 0.21 (0.04, 0.38) |
| Central Asia | 0.27 (0.09, 0.46) | -1.00 (-1.29, -0.70) | -1.06 (-1.21, -0.91) | 1.25 (1.10, 1.41) | 0.36 (0.11, 0.61) | 1.03 (0.74, 1.32) |
| Central Europe | -6.29 (-7.11, -5.47) | -0.09 (-0.29, 0.10) | -1.85 (-2.01, -1.69) | 0.11 (-0.05, 0.27) | -0.68 (-0.85, -0.50) | 0.45 (0.25, 0.65) |
| Central Latin America | -1.96 (-2.56, -1.37) | 0.13 (-0.24, 0.51) | -2.78 (-2.93, -2.64) | 1.05 (0.96, 1.13) | 1.57 (1.40, 1.74) | -0.31 (-0.54, -0.08) |
| Central Sub-Saharan Africa | 0.07 (-0.02, 0.15) | 0.24 (0.18, 0.30) | -0.47 (-0.52, -0.41) | 1.36 (1.17, 1.56) | 0.74 (0.61, 0.88) | 0.64 (0.51, 0.77) |
| East Asia | 4.80 (3.74, 5.87) | -2.46 (-2.80, -2.12) | -1.12 (-1.26, -0.97) | -0.90 (-1.09, -0.72) | -1.85 (-2.19, -1.51) | -0.24 (-0.47, 0.00) |
| Eastern Europe | -1.87 (-2.08, -1.67) | -0.40 (-0.78, -0.01) | -1.22 (-1.31, -1.13) | -0.21 (-0.39, -0.02) | -1.18 (-1.54, -0.83) | 1.48 (1.39, 1.57) |
| Eastern Sub-Saharan Africa | -1.15 (-1.29, -1.00) | -0.24 (-0.32, -0.17) | -1.67 (-1.79, -1.55) | 0.95 (0.87, 1.03) | 0.95 (0.78, 1.12) | 0.15 (0.12, 0.19) |
| Global | 0.06 (-0.07, 0.20) | -0.78 (-0.85, -0.70) | -1.27 (-1.36, -1.18) | -0.62 (-0.68, -0.57) | -0.54 (-0.70, -0.39) | -1.05 (-1.14, -0.95) |
| High SDI | -1.52 (-1.93, -1.11) | 0.04 (-0.13, 0.21) | -2.05 (-2.16, -1.93) | -1.34 (-1.44, -1.25) | -1.63 (-1.80, -1.45) | -2.02 (-2.14, -1.91) |
| High-income Asia Pacific | -0.93 (-1.28, -0.58) | -0.11 (-0.31, 0.09) | -1.67 (-1.78, -1.57) | -0.53 (-0.61, -0.45) | -2.37 (-2.65, -2.10) | -0.09 (-0.38, 0.21) |
| High-income North America | 0.12 (-0.07, 0.30) | 0.74 (0.57, 0.91) | -1.00 (-1.11, -0.89) | -1.28 (-1.47, -1.10) | -0.39 (-0.54, -0.25) | -2.40 (-2.56, -2.25) |
| High-middle SDI | -0.60 (-0.82, -0.38) | -1.17 (-1.28, -1.07) | -1.20 (-1.25, -1.15) | -0.70 (-0.80, -0.60) | -1.18 (-1.35, -1.02) | -0.79 (-0.97, -0.61) |
| Low SDI | -0.33 (-0.52, -0.14) | -0.10 (-0.18, -0.02) | -1.49 (-1.59, -1.38) | 1.06 (0.97, 1.15) | -0.05 (-0.20, 0.09) | 0.36 (0.29, 0.42) |
| Low-middle SDI | -0.95 (-1.02, -0.88) | 0.03 (-0.04, 0.10) | -1.35 (-1.49, -1.21) | 1.34 (1.27, 1.40) | 0.21 (0.10, 0.31) | 0.68 (0.55, 0.82) |
| Middle SDI | 1.04 (0.70, 1.38) | -1.24 (-1.35, -1.12) | -1.50 (-1.57, -1.44) | 0.32 (0.23, 0.41) | 0.26 (0.10, 0.43) | -0.17 (-0.36, 0.02) |
| North Africa and Middle East | -1.46 (-1.51, -1.40) | 0.11 (-0.11, 0.32) | -1.39 (-1.44, -1.34) | 1.10 (1.03, 1.18) | 0.04 (-0.26, 0.34) | 0.38 (0.30, 0.47) |
| Oceania | -0.29 (-0.34, -0.24) | 0.43 (0.39, 0.47) | -0.82 (-0.88, -0.77) | 0.99 (0.89, 1.08) | 0.13 (-0.22, 0.48) | 0.50 (0.44, 0.55) |
| South Asia | -1.56 (-1.73, -1.39) | -0.12 (-0.27, 0.03) | -2.06 (-2.37, -1.75) | 1.16 (1.07, 1.26) | -0.38 (-0.52, -0.23) | 0.21 (0.06, 0.36) |
| Southeast Asia | -1.50 (-1.58, -1.42) | -0.06 (-0.15, 0.02) | -1.32 (-1.43, -1.22) | 1.01 (0.93, 1.09) | 0.50 (0.47, 0.54) | 0.79 (0.70, 0.88) |
| Southern Latin America | -4.04 (-4.77, -3.30) | -1.26 (-1.38, -1.14) | -1.10 (-1.24, -0.96) | -0.51 (-0.68, -0.35) | 0.15 (-0.06, 0.36) | -0.45 (-0.79, -0.11) |
| Southern Sub-Saharan Africa | 0.96 (0.62, 1.31) | 1.86 (1.52, 2.21) | 1.71 (1.22, 2.19) | 1.63 (1.50, 1.77) | 0.26 (0.14, 0.38) | 0.89 (0.68, 1.10) |
| Tropical Latin America | 1.60 (1.42, 1.78) | -0.76 (-0.90, -0.63) | -1.78 (-1.90, -1.67) | -0.00 (-0.12, 0.12) | 1.11 (0.90, 1.31) | -0.03 (-0.38, 0.31) |
| Western Europe | -3.92 (-4.40, -3.44) | 0.13 (-0.01, 0.28) | -2.02 (-2.24, -1.80) | -1.35 (-1.42, -1.28) | -2.07 (-2.27, -1.87) | -1.85 (-1.99, -1.71) |
| Western Sub-Saharan Africa | 0.60 (0.17, 1.03) | 0.80 (0.74, 0.86) | -0.48 (-0.54, -0.41) | 1.48 (1.40, 1.56) | -0.58 (-0.72, -0.43) | 0.87 (0.82, 0.92) |

The location name is in alphabetical order. EAPC estimated annual percentage change, ASMR age-standardized mortality rate, CI confidence interval.

**Table S4. EAPC of the ASDR of 6 genital neoplasms in global, SDI, and 21 regions (1990-2021, 95% CI)**

| Location name | Uterine fibroids | Uterine  cancer | Cervical cancer | Ovarian cancer | Testicular cancer | Prostate cancer |
| --- | --- | --- | --- | --- | --- | --- |
| Andean Latin America | -1.78 (-2.08, -1.47) | -1.13 (-1.34, -0.93) | -1.71 (-1.87, -1.55) | 1.80 (1.43, 2.17) | 0.61 (0.14, 1.08) | -0.11 (-0.25, 0.04) |
| Australasia | -1.59 (-2.16, -1.01) | 0.32 (0.07, 0.56) | -3.13 (-3.40, -2.85) | -2.50 (-2.83, -2.16) | -1.95 (-2.15, -1.75) | -2.67 (-3.07, -2.27) |
| Caribbean | -1.11 (-1.30, -0.92) | 0.64 (0.45, 0.83) | -0.80 (-0.88, -0.72) | 0.80 (0.65, 0.96) | 3.40 (2.45, 4.36) | 0.36 (0.20, 0.52) |
| Central Asia | 0.12 (0.04, 0.21) | -1.14 (-1.40, -0.88) | -1.05 (-1.21, -0.89) | 1.05 (0.90, 1.21) | 0.11 (-0.11, 0.34) | 0.79 (0.54, 1.03) |
| Central Europe | -1.91 (-2.17, -1.64) | -0.19 (-0.36, -0.02) | -2.05 (-2.24, -1.86) | -0.20 (-0.36, -0.04) | -0.46 (-0.64, -0.28) | 0.49 (0.31, 0.68) |
| Central Latin America | -1.31 (-1.69, -0.93) | 0.38 (-0.01, 0.78) | -2.55 (-2.71, -2.38) | 1.19 (1.11, 1.26) | 1.99 (1.80, 2.18) | -0.22 (-0.44, 0.01) |
| Central Sub-Saharan Africa | -0.16 (-0.21, -0.11) | 0.17 (0.10, 0.24) | -0.54 (-0.59, -0.49) | 1.37 (1.17, 1.57) | 0.72 (0.56, 0.88) | 0.57 (0.44, 0.70) |
| East Asia | 2.32 (1.75, 2.89) | -2.39 (-2.72, -2.06) | -1.13 (-1.27, -0.98) | -0.92 (-1.09, -0.74) | -1.85 (-2.19, -1.51) | -0.20 (-0.40, -0.00) |
| Eastern Europe | -0.95 (-1.05, -0.84) | -0.48 (-0.88, -0.07) | -0.70 (-0.81, -0.59) | -0.44 (-0.62, -0.25) | -0.88 (-1.23, -0.54) | 1.51 (1.41, 1.60) |
| Eastern Sub-Saharan Africa | -0.69 (-0.76, -0.62) | -0.36 (-0.44, -0.27) | -1.81 (-1.93, -1.68) | 0.91 (0.83, 0.99) | 1.04 (0.86, 1.22) | 0.18 (0.15, 0.21) |
| Global | 0.05 (-0.01, 0.11) | -0.78 (-0.85, -0.71) | -1.27 (-1.36, -1.17) | -0.59 (-0.64, -0.54) | -0.29 (-0.44, -0.15) | -0.96 (-1.05, -0.87) |
| High SDI | -0.62 (-0.73, -0.51) | 0.26 (0.11, 0.42) | -1.99 (-2.10, -1.88) | -1.48 (-1.57, -1.39) | -1.23 (-1.37, -1.09) | -1.83 (-1.93, -1.73) |
| High-income Asia Pacific | -0.48 (-0.59, -0.37) | 0.30 (0.12, 0.49) | -1.26 (-1.36, -1.17) | -0.63 (-0.70, -0.55) | -1.96 (-2.27, -1.66) | 0.00 (-0.29, 0.29) |
| High-income North America | 0.42 (0.27, 0.57) | 1.00 (0.85, 1.16) | -1.05 (-1.18, -0.93) | -1.49 (-1.65, -1.33) | -0.07 (-0.22, 0.08) | -2.25 (-2.40, -2.09) |
| High-middle SDI | -0.83 (-0.91, -0.75) | -1.27 (-1.38, -1.15) | -1.12 (-1.17, -1.07) | -0.87 (-0.96, -0.79) | -0.82 (-0.96, -0.68) | -0.73 (-0.89, -0.57) |
| Low SDI | -0.26 (-0.39, -0.14) | -0.19 (-0.27, -0.10) | -1.64 (-1.75, -1.53) | 0.99 (0.89, 1.08) | -0.01 (-0.15, 0.14) | 0.24 (0.19, 0.30) |
| Low-middle SDI | -0.37 (-0.41, -0.33) | 0.04 (-0.03, 0.11) | -1.48 (-1.62, -1.33) | 1.29 (1.23, 1.34) | 0.27 (0.16, 0.38) | 0.62 (0.50, 0.73) |
| Middle SDI | 0.59 (0.44, 0.74) | -1.29 (-1.40, -1.18) | -1.52 (-1.60, -1.44) | 0.31 (0.22, 0.40) | 0.62 (0.43, 0.81) | -0.08 (-0.25, 0.10) |
| North Africa and Middle East | -1.02 (-1.07, -0.97) | 0.02 (-0.17, 0.22) | -1.59 (-1.63, -1.56) | 0.95 (0.88, 1.01) | 0.34 (0.05, 0.63) | 0.51 (0.44, 0.59) |
| Oceania | -0.23 (-0.27, -0.18) | 0.44 (0.40, 0.48) | -0.86 (-0.92, -0.81) | 1.00 (0.90, 1.09) | -0.07 (-0.31, 0.16) | 0.53 (0.48, 0.59) |
| South Asia | -0.59 (-0.66, -0.52) | -0.11 (-0.27, 0.05) | -2.23 (-2.54, -1.93) | 1.09 (1.00, 1.18) | -0.32 (-0.46, -0.17) | 0.08 (-0.06, 0.22) |
| Southeast Asia | -0.64 (-0.69, -0.59) | -0.05 (-0.14, 0.04) | -1.48 (-1.59, -1.37) | 0.99 (0.91, 1.07) | 0.45 (0.40, 0.50) | 0.81 (0.74, 0.89) |
| Southern Latin America | -1.79 (-2.09, -1.49) | -1.31 (-1.46, -1.16) | -1.08 (-1.22, -0.94) | -0.51 (-0.67, -0.36) | 0.34 (0.13, 0.55) | -0.55 (-0.88, -0.21) |
| Southern Sub-Saharan Africa | 0.52 (0.27, 0.77) | 1.90 (1.55, 2.24) | 1.71 (1.17, 2.26) | 1.59 (1.45, 1.73) | 0.40 (0.26, 0.54) | 0.94 (0.72, 1.15) |
| Tropical Latin America | 1.17 (1.06, 1.29) | -0.66 (-0.81, -0.51) | -1.64 (-1.78, -1.49) | -0.02 (-0.13, 0.08) | 1.49 (1.31, 1.67) | -0.11 (-0.45, 0.24) |
| Western Europe | -1.16 (-1.31, -1.01) | 0.23 (0.08, 0.39) | -2.02 (-2.23, -1.81) | -1.61 (-1.68, -1.54) | -1.60 (-1.76, -1.44) | -1.68 (-1.82, -1.54) |
| Western Sub-Saharan Africa | 0.34 (0.01, 0.67) | 0.62 (0.58, 0.67) | -0.68 (-0.74, -0.61) | 1.46 (1.37, 1.55) | -0.51 (-0.66, -0.35) | 0.80 (0.75, 0.84) |

The location name is in alphabetical order. EAPC estimated annual percentage change, ASDR age-standardized disability-adjusted life years rate, CI confidence interval.

**Table S5. EAPC of ASIR for 6 genital neoplasms in 204 countries and territories (1990-2021, 95% CI)**

| Location name | Uterine fibroids | Uterine  cancer | Cervical cancer | Ovarian cancer | Testicular cancer | Prostate cancer |
| --- | --- | --- | --- | --- | --- | --- |
| Afghanistan | -0.06 (-0.07, -0.04) | 2.59 (2.35, 2.83) | -0.41 (-0.47, -0.34) | 2.06 (1.85, 2.27) | 6.85 (6.39, 7.32) | 1.51 (1.27, 1.74) |
| Albania | 0.40 (0.35, 0.45) | 2.22 (1.93, 2.52) | 1.36 (0.92, 1.81) | 1.36 (1.02, 1.69) | 6.42 (5.64, 7.22) | 2.98 (2.67, 3.28) |
| Algeria | 0.17 (0.15, 0.18) | 2.06 (2.00, 2.12) | -0.60 (-0.79, -0.42) | 1.21 (1.16, 1.27) | 2.99 (2.75, 3.23) | 2.70 (2.55, 2.85) |
| American Samoa | 0.28 (0.20, 0.35) | 1.57 (1.50, 1.65) | 0.85 (0.70, 1.01) | 2.26 (2.10, 2.41) | 5.36 (4.31, 6.41) | 1.54 (1.36, 1.71) |
| Andorra | 0.33 (0.29, 0.37) | 0.43 (0.16, 0.69) | -0.30 (-0.57, -0.04) | -0.41 (-0.62, -0.19) | 1.24 (0.87, 1.60) | 1.43 (1.11, 1.75) |
| Angola | 0.57 (0.54, 0.60) | 1.57 (1.41, 1.74) | 0.51 (0.36, 0.66) | 2.88 (2.70, 3.06) | 5.43 (4.77, 6.09) | 1.90 (1.72, 2.07) |
| Antigua and Barbuda | -0.02 (-0.08, 0.04) | 1.77 (1.42, 2.12) | -0.07 (-0.22, 0.08) | 1.21 (1.05, 1.37) | 8.71 (7.28, 10.16) | 1.09 (0.70, 1.48) |
| Argentina | 0.19 (0.13, 0.24) | -0.24 (-0.41, -0.08) | 0.84 (0.61, 1.06) | -0.08 (-0.26, 0.10) | 4.03 (3.55, 4.51) | 1.43 (0.97, 1.89) |
| Armenia | 0.25 (0.23, 0.28) | 1.49 (0.92, 2.05) | -0.93 (-1.48, -0.37) | 1.15 (0.90, 1.41) | 4.59 (4.02, 5.17) | 3.52 (3.28, 3.75) |
| Australia | 0.11 (0.09, 0.14) | 1.65 (1.43, 1.86) | -1.26 (-1.51, -1.00) | -2.04 (-2.50, -1.58) | 0.52 (0.08, 0.97) | 0.32 (-0.52, 1.16) |
| Austria | -0.59 (-0.69, -0.49) | 0.05 (-0.06, 0.16) | -1.86 (-2.04, -1.67) | -1.70 (-1.83, -1.57) | 0.62 (0.21, 1.02) | 1.22 (0.72, 1.72) |
| Azerbaijan | 0.18 (0.15, 0.20) | 0.26 (-0.00, 0.51) | -1.10 (-1.30, -0.89) | 1.28 (0.93, 1.63) | 5.92 (5.16, 6.68) | 2.13 (1.93, 2.32) |
| Bahamas | 0.04 (0.00, 0.07) | 1.50 (1.08, 1.91) | -0.12 (-0.27, 0.03) | 0.90 (0.77, 1.02) | 9.47 (8.01, 10.96) | 1.50 (1.17, 1.83) |
| Bahrain | -0.50 (-0.61, -0.39) | 1.55 (1.28, 1.82) | -1.39 (-1.75, -1.02) | 0.35 (0.23, 0.46) | 3.89 (3.18, 4.60) | 3.34 (3.23, 3.45) |
| Bangladesh | 0.76 (0.68, 0.85) | 1.45 (1.26, 1.64) | -0.08 (-0.36, 0.19) | 2.27 (2.19, 2.35) | 8.02 (7.77, 8.28) | 1.95 (1.86, 2.04) |
| Barbados | -0.02 (-0.04, -0.00) | 1.56 (1.08, 2.03) | -0.08 (-0.20, 0.05) | 0.51 (0.37, 0.64) | 6.07 (4.15, 8.03) | 1.43 (1.27, 1.60) |
| Belarus | 0.14 (0.11, 0.17) | 1.31 (0.56, 2.07) | -0.05 (-0.38, 0.28) | 0.57 (0.07, 1.08) | 3.80 (3.63, 3.98) | 3.92 (3.55, 4.29) |
| Belgium | -0.03 (-0.09, 0.03) | 0.73 (0.56, 0.89) | -0.86 (-1.01, -0.71) | -1.94 (-2.08, -1.81) | 1.02 (0.79, 1.25) | 0.51 (-0.00, 1.03) |
| Belize | 0.24 (0.19, 0.29) | 1.25 (0.99, 1.51) | 0.73 (0.40, 1.06) | 1.72 (1.39, 2.05) | 9.27 (7.84, 10.71) | 2.12 (1.53, 2.71) |
| Benin | 0.14 (0.10, 0.19) | 1.17 (1.08, 1.26) | -0.01 (-0.14, 0.12) | 1.35 (1.25, 1.45) | 1.38 (1.09, 1.67) | 2.56 (2.47, 2.64) |
| Bermuda | -0.07 (-0.11, -0.03) | 0.29 (-0.16, 0.74) | -1.22 (-1.45, -0.99) | -0.54 (-0.72, -0.36) | 9.72 (8.16, 11.31) | 2.21 (1.83, 2.58) |
| Bhutan | 0.37 (0.35, 0.39) | 1.37 (1.22, 1.52) | -0.86 (-1.14, -0.58) | 2.11 (2.03, 2.18) | 8.24 (7.93, 8.56) | 2.72 (2.69, 2.75) |
| Bolivia (Plurinational State of) | -0.02 (-0.03, 0.00) | 0.94 (0.87, 1.01) | -0.53 (-0.64, -0.42) | 2.72 (2.51, 2.93) | 8.27 (8.01, 8.54) | 2.29 (2.20, 2.38) |
| Bosnia and Herzegovina | 0.27 (0.23, 0.30) | 2.51 (2.12, 2.91) | 1.20 (0.85, 1.55) | 1.15 (0.92, 1.38) | 4.40 (3.43, 5.37) | 4.28 (3.82, 4.74) |
| Botswana | 0.31 (-0.03, 0.65) | 1.86 (1.27, 2.44) | 0.34 (-0.41, 1.09) | 1.73 (1.47, 1.98) | 3.36 (2.59, 4.14) | 1.65 (1.50, 1.80) |
| Brazil | 1.05 (0.96, 1.15) | 0.78 (0.59, 0.97) | 0.04 (-0.17, 0.25) | 0.60 (0.49, 0.71) | 7.05 (6.83, 7.27) | 1.58 (1.18, 1.99) |
| Brunei Darussalam | 0.28 (0.17, 0.40) | 1.92 (1.78, 2.06) | -0.35 (-0.62, -0.08) | 1.37 (1.19, 1.55) | 3.13 (2.88, 3.39) | 2.02 (1.77, 2.27) |
| Bulgaria | 0.02 (0.00, 0.04) | 1.95 (1.48, 2.42) | 0.48 (0.26, 0.70) | 0.93 (0.70, 1.16) | 3.91 (3.30, 4.53) | 3.01 (2.85, 3.17) |
| Burkina Faso | 0.05 (-0.01, 0.11) | 1.05 (0.97, 1.13) | -0.25 (-0.33, -0.18) | 1.41 (1.32, 1.50) | 1.23 (1.08, 1.39) | 2.60 (2.48, 2.72) |
| Burundi | -0.40 (-0.43, -0.37) | -0.92 (-1.07, -0.78) | -1.99 (-2.22, -1.76) | 0.13 (-0.01, 0.27) | 3.52 (3.21, 3.83) | 1.36 (1.27, 1.46) |
| Cabo Verde | -0.45 (-0.50, -0.40) | 1.48 (1.31, 1.65) | -1.10 (-1.24, -0.97) | 4.01 (3.26, 4.77) | 5.92 (5.61, 6.22) | 4.23 (3.97, 4.50) |
| Cambodia | 0.00 (-0.02, 0.02) | 1.29 (1.17, 1.41) | -0.41 (-0.52, -0.29) | 3.34 (3.27, 3.41) | 7.29 (7.00, 7.59) | 3.04 (2.91, 3.17) |
| Cameroon | 0.00 (-0.02, 0.02) | 0.82 (0.66, 0.98) | -0.05 (-0.11, 0.02) | 1.46 (1.29, 1.62) | 1.26 (0.62, 1.91) | 2.72 (2.57, 2.87) |
| Canada | 0.09 (-0.12, 0.31) | 1.31 (1.14, 1.48) | 0.94 (0.75, 1.14) | -0.58 (-0.79, -0.37) | 2.54 (2.37, 2.71) | -1.37 (-1.77, -0.97) |
| Central African Republic | -0.10 (-0.13, -0.06) | 0.19 (0.15, 0.23) | -0.48 (-0.58, -0.38) | 0.85 (0.72, 0.98) | 0.98 (0.86, 1.11) | 0.59 (0.54, 0.65) |
| Chad | 0.00 (-0.02, 0.03) | 1.18 (1.12, 1.23) | 0.65 (0.60, 0.71) | 1.30 (1.26, 1.35) | 0.82 (0.53, 1.11) | 3.32 (3.18, 3.45) |
| Chile | -0.10 (-0.39, 0.18) | 1.64 (1.44, 1.85) | -0.88 (-1.13, -0.62) | 1.00 (0.57, 1.44) | 5.98 (5.31, 6.66) | 2.92 (2.56, 3.28) |
| China | 0.09 (-0.06, 0.24) | 1.04 (0.67, 1.41) | 2.59 (2.35, 2.83) | 0.34 (0.23, 0.45) | 7.18 (6.87, 7.49) | 3.91 (3.78, 4.05) |
| Colombia | 0.05 (0.02, 0.07) | 1.89 (1.41, 2.38) | 0.42 (0.18, 0.65) | 1.44 (1.32, 1.56) | 11.15 (10.67, 11.62) | 1.52 (1.13, 1.90) |
| Comoros | -0.15 (-0.19, -0.10) | 0.58 (0.51, 0.66) | -0.98 (-1.22, -0.73) | 1.34 (1.14, 1.55) | 4.03 (3.53, 4.53) | 1.26 (1.18, 1.35) |
| Congo | -0.09 (-0.12, -0.06) | 1.00 (0.89, 1.11) | -0.04 (-0.24, 0.16) | 1.77 (1.64, 1.89) | 5.20 (4.82, 5.58) | 2.28 (2.06, 2.51) |
| Cook Islands | 0.60 (0.57, 0.63) | 1.22 (1.02, 1.41) | 0.21 (-0.05, 0.47) | 2.22 (2.15, 2.29) | 4.38 (4.20, 4.56) | 1.98 (1.75, 2.20) |
| Costa Rica | 0.15 (0.13, 0.17) | 2.19 (1.76, 2.63) | -0.63 (-1.01, -0.25) | 2.28 (2.04, 2.52) | 6.87 (6.64, 7.10) | 2.56 (2.18, 2.93) |
| Croatia | 0.08 (0.01, 0.14) | 1.69 (1.24, 2.14) | -0.77 (-1.06, -0.47) | -0.10 (-0.35, 0.14) | 2.42 (1.99, 2.84) | 2.96 (2.68, 3.23) |
| Cuba | 0.03 (0.01, 0.06) | 1.16 (0.77, 1.56) | -0.57 (-0.84, -0.31) | 1.12 (0.81, 1.42) | 7.85 (6.54, 9.18) | 2.30 (2.15, 2.44) |
| Cyprus | 0.16 (0.03, 0.29) | 1.50 (1.21, 1.79) | 0.08 (-0.21, 0.37) | 0.10 (-0.18, 0.38) | 3.70 (3.05, 4.36) | 3.05 (2.71, 3.39) |
| Czechia | 0.07 (-0.01, 0.16) | 0.27 (0.09, 0.45) | -1.65 (-1.89, -1.42) | -0.11 (-0.46, 0.24) | 2.88 (2.56, 3.21) | 2.83 (2.20, 3.46) |
| Côte d'Ivoire | 0.18 (0.10, 0.25) | 1.68 (1.56, 1.80) | 0.76 (0.62, 0.89) | 1.58 (1.48, 1.69) | 3.47 (3.00, 3.93) | 1.60 (1.47, 1.72) |
| Democratic People's Republic of Korea | -0.13 (-0.14, -0.11) | 1.06 (0.92, 1.20) | 1.12 (0.99, 1.25) | 1.34 (1.28, 1.41) | 2.97 (2.55, 3.39) | 2.90 (2.63, 3.17) |
| Democratic Republic of the Congo | -0.09 (-0.12, -0.06) | 1.00 (0.82, 1.19) | 0.32 (0.17, 0.46) | 1.50 (1.18, 1.81) | 4.08 (3.40, 4.77) | 1.27 (0.86, 1.69) |
| Denmark | 0.00 (-0.12, 0.13) | 0.30 (0.16, 0.44) | -2.01 (-2.25, -1.77) | -1.25 (-1.82, -0.67) | 0.52 (0.02, 1.03) | 3.22 (2.47, 3.98) |
| Djibouti | 0.27 (0.25, 0.29) | 0.71 (0.62, 0.80) | -0.11 (-0.21, -0.01) | 1.02 (0.94, 1.10) | 4.15 (3.59, 4.71) | 1.84 (1.75, 1.92) |
| Dominica | -0.10 (-0.13, -0.08) | 0.02 (-0.15, 0.20) | -0.42 (-0.59, -0.25) | 0.53 (0.45, 0.60) | 7.07 (6.35, 7.79) | 1.28 (1.00, 1.56) |
| Dominican Republic | 0.03 (-0.01, 0.06) | 1.38 (1.30, 1.45) | 0.87 (0.71, 1.02) | 1.46 (1.32, 1.60) | 5.73 (4.78, 6.69) | 1.49 (0.97, 2.01) |
| Ecuador | -0.06 (-0.10, -0.02) | 0.21 (-0.50, 0.94) | 0.38 (0.11, 0.65) | 7.20 (5.17, 9.27) | 13.00 (10.49, 15.57) | 2.05 (1.51, 2.60) |
| Egypt | -0.01 (-0.03, 0.02) | 1.89 (1.80, 1.98) | 2.45 (2.08, 2.82) | 3.43 (2.98, 3.89) | 4.82 (4.56, 5.08) | 4.66 (4.43, 4.89) |
| El Salvador | 0.35 (0.31, 0.38) | 2.36 (2.22, 2.50) | 1.39 (0.92, 1.86) | 3.10 (2.77, 3.43) | 11.52 (10.62, 12.44) | 3.31 (2.77, 3.84) |
| Equatorial Guinea | 0.17 (0.03, 0.32) | 3.01 (2.79, 3.23) | 0.59 (0.39, 0.79) | 3.33 (3.12, 3.54) | 11.90 (11.16, 12.65) | 4.12 (3.93, 4.30) |
| Eritrea | -0.04 (-0.11, 0.03) | 1.01 (0.97, 1.05) | -0.29 (-0.37, -0.21) | 1.58 (1.45, 1.71) | 3.74 (3.48, 4.00) | 1.41 (1.27, 1.54) |
| Estonia | -0.03 (-0.05, -0.01) | 0.81 (0.61, 1.00) | -1.12 (-1.32, -0.92) | -0.99 (-1.75, -0.23) | 1.46 (1.00, 1.92) | 5.18 (4.46, 5.89) |
| Eswatini | -0.10 (-0.17, -0.02) | 1.82 (1.52, 2.13) | 2.08 (1.39, 2.78) | 1.27 (1.21, 1.34) | 2.09 (1.30, 2.89) | 1.24 (1.15, 1.33) |
| Ethiopia | 0.23 (0.19, 0.26) | 0.26 (0.02, 0.49) | -2.13 (-2.40, -1.85) | 1.88 (1.71, 2.05) | 7.04 (6.55, 7.53) | 1.96 (1.82, 2.10) |
| Fiji | 0.17 (0.14, 0.19) | 0.90 (0.73, 1.06) | -0.60 (-0.85, -0.35) | 0.65 (0.55, 0.76) | 2.21 (1.51, 2.92) | 0.84 (0.67, 1.00) |
| Finland | -0.43 (-0.60, -0.26) | 0.90 (0.78, 1.03) | -0.24 (-0.37, -0.12) | -1.06 (-1.30, -0.81) | 2.37 (2.05, 2.70) | 2.49 (1.80, 3.18) |
| France | 0.10 (0.02, 0.17) | 1.43 (1.25, 1.61) | -0.12 (-0.25, 0.02) | -0.70 (-0.89, -0.52) | 2.64 (2.29, 2.98) | 1.93 (1.61, 2.26) |
| Gabon | 0.36 (0.34, 0.38) | 1.00 (0.84, 1.16) | 0.19 (0.02, 0.37) | 1.41 (1.32, 1.51) | 4.70 (4.07, 5.33) | 2.40 (2.26, 2.55) |
| Gambia | 0.39 (0.31, 0.47) | 1.81 (1.59, 2.02) | 0.84 (0.60, 1.09) | 1.94 (1.68, 2.20) | 2.66 (2.07, 3.25) | 1.45 (1.33, 1.58) |
| Georgia | 0.58 (0.50, 0.65) | 0.03 (-0.51, 0.57) | -0.47 (-1.00, 0.06) | 5.93 (5.48, 6.39) | 1.68 (0.92, 2.44) | 4.34 (3.82, 4.86) |
| Germany | 0.08 (-0.01, 0.17) | -0.90 (-1.16, -0.64) | -0.97 (-1.32, -0.61) | -1.81 (-1.89, -1.73) | 0.91 (0.52, 1.29) | 2.09 (1.52, 2.68) |
| Ghana | 0.29 (0.26, 0.33) | 2.00 (1.91, 2.09) | 0.12 (0.06, 0.17) | 2.23 (2.18, 2.29) | 2.19 (1.71, 2.68) | 0.98 (0.78, 1.18) |
| Greece | 0.09 (0.06, 0.12) | 1.59 (1.42, 1.76) | -0.90 (-1.09, -0.72) | -0.29 (-0.44, -0.14) | 0.83 (0.37, 1.29) | 0.18 (-0.16, 0.52) |
| Greenland | 0.38 (0.36, 0.41) | -0.03 (-0.15, 0.10) | -0.99 (-1.13, -0.86) | -0.67 (-0.86, -0.49) | 1.18 (0.50, 1.86) | 1.76 (1.64, 1.88) |
| Grenada | -0.07 (-0.09, -0.04) | 0.80 (0.63, 0.98) | -0.47 (-0.72, -0.22) | 1.08 (0.98, 1.19) | 9.32 (8.08, 10.58) | 1.95 (1.13, 2.79) |
| Guam | 0.44 (0.38, 0.51) | 0.83 (0.54, 1.11) | 0.11 (-0.10, 0.31) | 3.22 (2.60, 3.84) | 5.11 (4.51, 5.73) | 0.99 (0.62, 1.35) |
| Guatemala | 0.16 (0.13, 0.20) | 1.11 (0.82, 1.40) | 1.50 (0.80, 2.19) | 3.42 (2.98, 3.87) | 7.53 (6.95, 8.10) | 3.39 (2.51, 4.28) |
| Guinea | 0.20 (0.19, 0.21) | 0.87 (0.81, 0.93) | 0.15 (0.11, 0.20) | 1.31 (1.27, 1.36) | 2.70 (2.47, 2.94) | 1.93 (1.86, 2.00) |
| Guinea-Bissau | 0.04 (0.02, 0.06) | 1.42 (1.37, 1.47) | 0.53 (0.47, 0.58) | 1.87 (1.84, 1.90) | 1.12 (0.88, 1.35) | 2.46 (2.34, 2.58) |
| Guyana | 0.19 (0.17, 0.21) | 1.47 (1.05, 1.90) | 0.02 (-0.28, 0.31) | 1.87 (1.48, 2.27) | 8.77 (7.35, 10.21) | 1.52 (1.23, 1.82) |
| Haiti | 0.10 (0.08, 0.13) | 0.60 (0.49, 0.71) | -0.47 (-0.59, -0.34) | 1.39 (1.26, 1.52) | 3.67 (3.48, 3.86) | 1.32 (1.14, 1.49) |
| Honduras | 0.28 (0.27, 0.30) | 2.45 (2.25, 2.64) | 0.55 (0.29, 0.82) | 1.73 (1.56, 1.91) | 3.15 (3.04, 3.26) | 2.39 (2.28, 2.50) |
| Hungary | -0.00 (-0.03, 0.03) | 0.51 (0.22, 0.81) | -0.88 (-1.24, -0.52) | -0.37 (-0.64, -0.11) | 2.54 (2.18, 2.91) | 1.96 (1.64, 2.28) |
| Iceland | -0.17 (-0.27, -0.07) | 0.52 (0.38, 0.67) | -1.54 (-1.82, -1.26) | -1.62 (-1.85, -1.40) | 0.98 (0.59, 1.37) | 0.45 (0.11, 0.80) |
| India | 1.16 (1.02, 1.29) | 1.78 (1.49, 2.08) | -0.67 (-1.04, -0.30) | 1.88 (1.78, 1.99) | 5.49 (5.10, 5.88) | 2.24 (2.04, 2.44) |
| Indonesia | -0.33 (-0.45, -0.22) | 1.07 (0.99, 1.14) | -0.14 (-0.26, -0.02) | 1.57 (1.40, 1.75) | 4.95 (4.49, 5.40) | 2.78 (2.72, 2.84) |
| Iran (Islamic Republic of) | -0.71 (-1.06, -0.36) | 2.89 (2.47, 3.31) | -0.86 (-1.01, -0.72) | 2.41 (2.23, 2.59) | 6.97 (6.27, 7.67) | 3.45 (3.31, 3.59) |
| Iraq | -0.08 (-0.12, -0.04) | 2.95 (2.66, 3.24) | 0.27 (0.12, 0.42) | 1.80 (1.68, 1.92) | 4.53 (4.22, 4.84) | 3.77 (3.39, 4.14) |
| Ireland | 0.06 (0.04, 0.07) | 2.24 (1.87, 2.62) | -1.24 (-1.85, -0.63) | -1.15 (-1.38, -0.93) | 2.78 (2.31, 3.25) | 1.49 (0.92, 2.06) |
| Israel | -0.06 (-0.09, -0.03) | 1.53 (1.21, 1.86) | -0.53 (-0.74, -0.31) | -1.33 (-1.55, -1.12) | 2.26 (1.61, 2.91) | 0.71 (0.12, 1.30) |
| Italy | -0.30 (-0.32, -0.28) | 4.93 (3.96, 5.91) | 3.54 (2.81, 4.29) | -0.39 (-0.60, -0.19) | 3.21 (2.74, 3.68) | 0.95 (0.48, 1.43) |
| Jamaica | 0.10 (0.07, 0.12) | 2.22 (1.70, 2.73) | -0.08 (-0.41, 0.26) | 0.85 (0.58, 1.11) | 6.72 (5.00, 8.48) | 2.50 (1.69, 3.32) |
| Japan | 0.01 (-0.08, 0.10) | 3.51 (3.32, 3.71) | 1.40 (1.22, 1.59) | 0.41 (0.14, 0.69) | 0.44 (-0.11, 1.00) | 3.39 (2.79, 3.99) |
| Jordan | -0.08 (-0.15, -0.01) | 1.39 (0.97, 1.82) | -2.32 (-2.83, -1.80) | 1.06 (0.73, 1.38) | 5.98 (5.43, 6.54) | 3.64 (3.33, 3.95) |
| Kazakhstan | 0.15 (0.14, 0.17) | 0.24 (-0.43, 0.91) | 0.91 (0.54, 1.29) | 0.28 (0.02, 0.55) | 4.46 (3.83, 5.10) | 2.83 (2.37, 3.28) |
| Kenya | 0.07 (0.05, 0.08) | 1.90 (1.72, 2.08) | 0.74 (0.65, 0.83) | 2.13 (2.02, 2.24) | 2.53 (1.88, 3.19) | 2.22 (2.09, 2.35) |
| Kiribati | 0.40 (0.35, 0.45) | 0.93 (0.89, 0.98) | 0.23 (0.18, 0.28) | 2.11 (1.88, 2.34) | 2.41 (2.33, 2.48) | 0.94 (0.91, 0.98) |
| Kuwait | 1.01 (0.84, 1.17) | 4.88 (4.23, 5.54) | -2.77 (-3.33, -2.21) | -0.22 (-0.59, 0.16) | 0.24 (-1.88, 2.41) | 3.91 (3.22, 4.60) |
| Kyrgyzstan | 0.15 (0.14, 0.16) | 0.51 (0.13, 0.88) | -0.01 (-0.33, 0.31) | 3.84 (3.16, 4.53) | 2.30 (1.52, 3.08) | 1.49 (1.16, 1.83) |
| Lao People's Democratic Republic | 0.22 (0.21, 0.24) | 0.65 (0.59, 0.71) | -1.16 (-1.26, -1.06) | 3.07 (2.95, 3.19) | 5.60 (5.15, 6.05) | 2.59 (2.51, 2.67) |
| Latvia | 0.03 (-0.09, 0.15) | 1.68 (1.30, 2.06) | -1.24 (-1.49, -1.00) | 0.67 (0.29, 1.05) | 2.66 (2.06, 3.27) | 4.15 (3.86, 4.44) |
| Lebanon | 0.08 (0.05, 0.12) | 1.67 (1.52, 1.82) | -1.86 (-1.99, -1.72) | 1.42 (1.24, 1.59) | 6.34 (5.99, 6.69) | 4.47 (4.08, 4.87) |
| Lesotho | -0.15 (-0.18, -0.12) | 2.99 (2.57, 3.41) | 3.86 (3.19, 4.52) | 1.89 (1.77, 2.02) | 2.23 (1.70, 2.77) | 1.45 (1.28, 1.62) |
| Liberia | 0.08 (0.05, 0.11) | 2.37 (2.16, 2.59) | 1.37 (1.23, 1.51) | 2.53 (2.40, 2.66) | 4.89 (4.45, 5.33) | 3.20 (3.05, 3.35) |
| Libya | 0.24 (0.17, 0.30) | 2.80 (2.48, 3.12) | 1.16 (0.96, 1.35) | 2.03 (1.80, 2.27) | 2.88 (2.49, 3.28) | 2.57 (2.26, 2.88) |
| Lithuania | -0.11 (-0.16, -0.05) | 1.22 (0.94, 1.51) | -0.85 (-1.18, -0.53) | -0.43 (-0.94, 0.09) | 1.96 (1.55, 2.38) | 3.94 (3.44, 4.44) |
| Luxembourg | -0.34 (-0.48, -0.21) | 0.81 (0.47, 1.14) | -1.69 (-1.94, -1.44) | -1.46 (-1.69, -1.23) | -0.26 (-0.68, 0.17) | 1.32 (0.98, 1.67) |
| Madagascar | 0.05 (0.04, 0.07) | 0.34 (0.20, 0.48) | -0.39 (-0.52, -0.27) | 0.87 (0.69, 1.05) | 3.41 (3.15, 3.66) | 0.22 (0.05, 0.40) |
| Malawi | 0.03 (0.01, 0.06) | 1.29 (1.23, 1.36) | 0.88 (0.65, 1.12) | 2.01 (1.84, 2.18) | 5.45 (5.01, 5.88) | 2.25 (2.18, 2.32) |
| Malaysia | 0.14 (0.10, 0.17) | 1.49 (1.35, 1.63) | 0.27 (-0.15, 0.70) | 2.00 (1.56, 2.43) | 5.03 (4.87, 5.19) | 2.90 (2.76, 3.03) |
| Maldives | -0.29 (-0.56, -0.03) | -0.44 (-0.65, -0.22) | -3.61 (-3.84, -3.38) | 1.37 (0.75, 1.98) | 10.45 (9.40, 11.50) | 2.40 (2.13, 2.67) |
| Mali | 0.20 (0.17, 0.23) | 0.69 (0.65, 0.74) | -0.51 (-0.60, -0.42) | 1.05 (1.01, 1.09) | 3.63 (3.43, 3.83) | 1.78 (1.73, 1.82) |
| Malta | -0.16 (-0.29, -0.03) | 0.87 (0.64, 1.10) | -0.48 (-0.89, -0.07) | -0.60 (-0.77, -0.43) | 2.42 (1.94, 2.90) | 1.01 (0.78, 1.25) |
| Marshall Islands | 0.36 (0.32, 0.40) | 1.46 (1.38, 1.53) | 0.32 (0.16, 0.47) | 2.42 (2.29, 2.54) | 2.22 (1.83, 2.61) | 2.20 (2.11, 2.29) |
| Mauritania | 0.21 (0.17, 0.24) | 1.47 (1.33, 1.61) | 0.60 (0.47, 0.72) | 1.99 (1.90, 2.08) | 4.32 (4.06, 4.58) | 4.05 (3.97, 4.12) |
| Mauritius | 0.20 (0.17, 0.23) | -0.67 (-1.38, 0.03) | -1.64 (-2.20, -1.09) | 1.89 (1.44, 2.33) | 5.22 (4.36, 6.08) | 2.14 (1.71, 2.57) |
| Mexico | -0.16 (-0.19, -0.12) | 3.01 (2.52, 3.51) | -1.67 (-1.89, -1.46) | 1.83 (1.77, 1.89) | 8.69 (8.51, 8.86) | 1.47 (1.12, 1.82) |
| Micronesia (Federated States of) | 0.23 (0.14, 0.31) | 1.35 (1.31, 1.40) | 0.20 (0.13, 0.28) | 2.34 (2.16, 2.52) | 3.71 (3.62, 3.80) | 1.86 (1.80, 1.92) |
| Monaco | 0.04 (0.03, 0.06) | 1.22 (1.00, 1.45) | 0.20 (0.08, 0.32) | -0.61 (-0.66, -0.56) | 1.69 (1.52, 1.87) | 1.78 (1.58, 1.98) |
| Mongolia | 0.31 (0.29, 0.33) | 1.40 (1.24, 1.56) | 0.28 (0.09, 0.47) | 1.14 (1.01, 1.28) | 7.48 (7.14, 7.82) | 3.54 (3.18, 3.89) |
| Montenegro | 0.19 (0.17, 0.21) | 1.31 (1.14, 1.47) | 0.04 (-0.30, 0.39) | 0.10 (-0.22, 0.41) | 3.31 (2.99, 3.62) | 2.26 (1.90, 2.61) |
| Morocco | 0.02 (-0.00, 0.04) | 2.56 (2.48, 2.65) | 0.62 (0.53, 0.72) | 2.03 (1.97, 2.08) | 2.93 (2.75, 3.11) | 3.17 (2.85, 3.50) |
| Mozambique | 0.19 (0.18, 0.20) | 1.18 (1.03, 1.33) | 0.72 (0.49, 0.95) | 1.42 (1.29, 1.54) | 4.35 (4.01, 4.69) | 1.13 (1.08, 1.18) |
| Myanmar | 0.47 (0.43, 0.50) | 0.59 (0.49, 0.69) | -1.45 (-1.61, -1.29) | 1.71 (1.59, 1.82) | 6.22 (5.50, 6.95) | 2.67 (2.56, 2.78) |
| Namibia | 0.12 (0.08, 0.17) | 1.49 (1.36, 1.61) | 2.06 (1.92, 2.21) | 1.30 (1.20, 1.41) | 5.07 (4.67, 5.47) | 3.62 (3.37, 3.87) |
| Nauru | 0.46 (0.40, 0.53) | 1.50 (1.35, 1.64) | 0.41 (0.31, 0.52) | 2.26 (2.22, 2.31) | 1.75 (0.81, 2.71) | 0.47 (0.22, 0.72) |
| Nepal | 0.18 (0.08, 0.28) | 1.54 (1.18, 1.90) | -0.11 (-0.59, 0.37) | 2.34 (2.29, 2.39) | 6.64 (6.47, 6.81) | 2.18 (2.11, 2.25) |
| Netherlands | 0.05 (0.04, 0.06) | 0.59 (0.37, 0.82) | -0.61 (-0.71, -0.51) | -1.92 (-2.11, -1.73) | 2.00 (1.74, 2.25) | 1.63 (1.17, 2.08) |
| New Zealand | -0.63 (-0.71, -0.55) | 1.56 (1.37, 1.74) | -2.82 (-3.25, -2.39) | -2.05 (-2.28, -1.82) | 0.23 (-0.31, 0.77) | -0.25 (-0.47, -0.03) |
| Nicaragua | 0.16 (0.13, 0.19) | 2.27 (2.07, 2.47) | -0.37 (-0.53, -0.21) | 2.35 (2.03, 2.68) | 9.24 (8.89, 9.58) | 2.50 (2.18, 2.83) |
| Niger | 0.40 (0.38, 0.42) | 1.28 (1.22, 1.34) | 0.21 (0.15, 0.27) | 1.50 (1.44, 1.57) | 0.84 (0.69, 0.98) | 2.61 (2.45, 2.78) |
| Nigeria | 0.72 (0.70, 0.74) | 2.46 (2.16, 2.75) | 0.61 (0.48, 0.74) | 2.65 (2.37, 2.92) | 4.58 (4.01, 5.16) | 2.01 (1.88, 2.14) |
| Niue | 0.20 (0.18, 0.23) | 1.06 (0.96, 1.16) | -0.28 (-0.49, -0.06) | 1.94 (1.75, 2.14) | 3.03 (2.87, 3.19) | 2.04 (1.90, 2.18) |
| North Macedonia | 0.08 (0.06, 0.09) | 1.94 (1.54, 2.36) | -0.11 (-0.60, 0.37) | 0.53 (0.25, 0.81) | 4.79 (4.15, 5.44) | 3.13 (2.85, 3.42) |
| Northern Mariana Islands | 0.43 (0.28, 0.57) | 1.94 (1.71, 2.17) | -0.55 (-0.72, -0.37) | 3.52 (3.02, 4.03) | 2.39 (1.23, 3.55) | 1.45 (1.17, 1.73) |
| Norway | -0.54 (-0.89, -0.19) | 0.51 (0.02, 1.00) | -1.31 (-1.53, -1.10) | -1.40 (-1.75, -1.05) | -0.23 (-1.30, 0.85) | 1.49 (0.87, 2.11) |
| Oman | 0.38 (0.22, 0.54) | 2.11 (1.83, 2.40) | -1.42 (-1.65, -1.18) | 1.23 (0.82, 1.65) | 4.38 (3.77, 4.98) | 3.16 (2.83, 3.49) |
| Pakistan | 0.24 (0.21, 0.27) | 1.72 (1.59, 1.85) | 0.47 (0.27, 0.67) | 1.89 (1.74, 2.03) | 3.56 (3.26, 3.86) | 1.75 (1.68, 1.81) |
| Palau | -0.13 (-0.27, 0.01) | 0.14 (0.03, 0.25) | -0.88 (-1.05, -0.71) | 0.78 (0.65, 0.90) | 2.42 (2.15, 2.70) | 0.92 (0.79, 1.06) |
| Palestine | -0.11 (-0.17, -0.05) | 1.30 (1.17, 1.42) | -1.06 (-1.17, -0.95) | 1.41 (1.31, 1.51) | 2.90 (2.41, 3.40) | 2.45 (2.33, 2.57) |
| Panama | 0.18 (0.17, 0.20) | 2.94 (2.60, 3.28) | -1.10 (-1.41, -0.78) | 2.84 (2.52, 3.16) | 8.85 (8.23, 9.47) | 2.02 (1.45, 2.58) |
| Papua New Guinea | 0.26 (0.22, 0.29) | 0.39 (0.25, 0.53) | -0.73 (-0.85, -0.61) | 1.42 (1.28, 1.56) | 1.55 (1.15, 1.94) | 1.48 (1.43, 1.53) |
| Paraguay | 0.23 (0.21, 0.25) | 0.68 (0.54, 0.82) | 0.34 (0.17, 0.51) | 1.56 (1.34, 1.78) | 6.02 (5.64, 6.40) | 2.71 (2.35, 3.06) |
| Peru | 0.10 (0.08, 0.12) | 1.32 (1.06, 1.58) | 0.83 (0.57, 1.10) | 1.77 (1.58, 1.96) | 9.56 (9.11, 10.02) | 3.17 (2.99, 3.35) |
| Philippines | 0.41 (0.36, 0.46) | 0.93 (0.86, 1.01) | 0.40 (0.30, 0.49) | 1.58 (1.53, 1.62) | 1.54 (1.05, 2.03) | 1.10 (1.01, 1.19) |
| Poland | -0.95 (-1.29, -0.62) | 2.19 (2.07, 2.31) | -1.75 (-2.11, -1.39) | -0.32 (-0.55, -0.09) | 4.38 (4.16, 4.60) | 4.15 (3.78, 4.53) |
| Portugal | -0.47 (-0.58, -0.36) | 1.35 (1.19, 1.51) | -0.74 (-1.02, -0.46) | -1.15 (-1.35, -0.94) | 2.44 (2.08, 2.81) | 1.82 (1.45, 2.20) |
| Puerto Rico | 0.00 (-0.03, 0.04) | 2.13 (1.83, 2.44) | 0.37 (0.20, 0.55) | 2.52 (1.76, 3.28) | 9.72 (8.41, 11.05) | 0.77 (0.50, 1.04) |
| Qatar | -0.72 (-1.07, -0.37) | 2.74 (2.47, 3.01) | -1.60 (-1.99, -1.21) | 0.64 (0.43, 0.84) | 9.80 (8.38, 11.24) | 3.95 (3.63, 4.28) |
| Republic of Korea | 0.10 (-0.11, 0.32) | 0.54 (0.17, 0.91) | -1.15 (-1.30, -1.00) | 1.85 (1.58, 2.11) | 4.99 (4.61, 5.37) | 6.57 (5.85, 7.30) |
| Republic of Moldova | 0.11 (0.08, 0.15) | 0.93 (0.56, 1.29) | -0.06 (-0.27, 0.15) | -0.81 (-1.21, -0.41) | 2.88 (2.25, 3.51) | 4.47 (3.81, 5.14) |
| Romania | 0.14 (0.08, 0.20) | 1.78 (1.63, 1.92) | -0.07 (-0.45, 0.31) | 0.42 (0.26, 0.58) | 5.02 (4.57, 5.47) | 4.44 (4.24, 4.65) |
| Russian Federation | 0.05 (0.03, 0.07) | 0.94 (0.52, 1.37) | 2.47 (2.29, 2.64) | -0.34 (-0.49, -0.18) | 2.71 (2.33, 3.09) | 4.68 (4.38, 4.99) |
| Rwanda | 0.15 (0.11, 0.18) | -0.06 (-0.40, 0.28) | -2.41 (-2.82, -2.00) | 1.52 (1.34, 1.71) | 6.48 (5.84, 7.13) | 1.79 (1.50, 2.08) |
| Saint Kitts and Nevis | -0.06 (-0.08, -0.03) | 0.75 (0.41, 1.09) | -1.93 (-2.21, -1.66) | -0.11 (-0.23, 0.01) | 10.83 (9.27, 12.40) | 3.37 (2.83, 3.92) |
| Saint Lucia | -0.08 (-0.12, -0.03) | 0.10 (-0.21, 0.40) | -1.21 (-1.35, -1.07) | 0.41 (0.30, 0.52) | 10.07 (8.36, 11.80) | 1.45 (1.08, 1.82) |
| Saint Vincent and the Grenadines | 0.06 (0.04, 0.09) | 0.17 (-0.05, 0.39) | -0.77 (-0.92, -0.61) | 0.49 (0.32, 0.66) | 8.08 (6.74, 9.44) | 1.89 (1.64, 2.13) |
| Samoa | 0.16 (0.14, 0.18) | 1.25 (1.18, 1.33) | 1.04 (0.88, 1.21) | 1.48 (1.37, 1.59) | 3.02 (2.90, 3.14) | 1.18 (1.12, 1.24) |
| San Marino | 0.25 (0.23, 0.28) | 0.61 (0.24, 0.98) | -0.27 (-0.66, 0.12) | -0.57 (-0.87, -0.27) | 0.83 (0.42, 1.24) | 0.51 (0.05, 0.96) |
| Sao Tome and Principe | -0.11 (-0.18, -0.03) | 1.94 (1.81, 2.07) | 0.19 (-0.18, 0.56) | 2.06 (1.90, 2.23) | 4.69 (4.36, 5.01) | 2.90 (2.81, 2.99) |
| Saudi Arabia | 0.31 (0.28, 0.35) | 3.86 (3.69, 4.03) | 0.71 (0.51, 0.92) | 1.82 (1.57, 2.07) | 7.09 (6.61, 7.57) | 3.83 (3.73, 3.92) |
| Senegal | -0.02 (-0.04, 0.01) | 1.86 (1.73, 1.99) | 0.52 (0.38, 0.65) | 2.20 (2.07, 2.33) | 2.34 (2.10, 2.57) | 3.07 (2.93, 3.21) |
| Serbia | 0.24 (0.17, 0.31) | 1.55 (1.39, 1.71) | -0.36 (-0.64, -0.09) | 0.62 (0.49, 0.76) | 3.67 (3.36, 3.99) | 3.03 (2.79, 3.27) |
| Seychelles | -0.09 (-0.16, -0.02) | 0.53 (0.42, 0.63) | -0.48 (-0.58, -0.38) | 1.53 (1.30, 1.77) | 3.49 (3.17, 3.81) | 3.15 (2.69, 3.60) |
| Sierra Leone | 0.13 (0.06, 0.19) | 2.20 (2.08, 2.31) | 1.75 (1.55, 1.96) | 2.09 (2.02, 2.16) | 2.30 (1.69, 2.92) | 2.69 (2.50, 2.89) |
| Singapore | -0.01 (-0.08, 0.06) | 1.63 (1.33, 1.94) | -2.21 (-2.46, -1.97) | -0.15 (-0.45, 0.14) | 2.95 (2.46, 3.45) | 3.58 (3.23, 3.93) |
| Slovakia | -0.25 (-0.44, -0.06) | 0.76 (0.62, 0.91) | -0.61 (-0.75, -0.47) | -0.12 (-0.28, 0.04) | 3.30 (3.15, 3.45) | 2.88 (2.74, 3.01) |
| Slovenia | 0.01 (-0.07, 0.10) | 0.94 (0.70, 1.19) | -0.86 (-1.15, -0.57) | -0.86 (-1.15, -0.56) | 3.10 (2.73, 3.48) | 4.21 (3.64, 4.79) |
| Solomon Islands | 0.39 (0.35, 0.42) | 1.61 (1.36, 1.87) | 0.63 (0.45, 0.82) | 3.31 (3.19, 3.42) | 2.42 (1.99, 2.84) | 1.14 (1.02, 1.25) |
| Somalia | 0.07 (0.03, 0.12) | 0.29 (0.23, 0.36) | -0.34 (-0.43, -0.25) | 0.88 (0.84, 0.91) | 1.48 (1.36, 1.61) | -0.01 (-0.03, 0.01) |
| South Africa | -0.03 (-0.09, 0.03) | 2.50 (2.30, 2.70) | 1.80 (1.27, 2.33) | 1.32 (1.21, 1.43) | 3.52 (2.95, 4.09) | 2.22 (2.04, 2.39) |
| South Sudan | 0.42 (0.39, 0.46) | 1.21 (0.98, 1.44) | 0.79 (0.34, 1.23) | 1.29 (1.07, 1.50) | 2.55 (2.20, 2.89) | 0.51 (0.46, 0.57) |
| Spain | 0.02 (-0.04, 0.08) | 1.06 (0.90, 1.22) | -0.77 (-0.92, -0.63) | -1.08 (-1.22, -0.94) | 0.88 (0.51, 1.25) | 1.54 (1.00, 2.07) |
| Sri Lanka | 0.35 (0.31, 0.39) | 1.25 (1.06, 1.43) | 0.20 (0.07, 0.34) | 2.01 (1.84, 2.18) | 5.32 (5.15, 5.49) | 2.72 (2.60, 2.84) |
| Sudan | 0.33 (0.26, 0.40) | 2.39 (2.18, 2.60) | -0.34 (-0.47, -0.20) | 2.02 (1.82, 2.22) | 7.13 (6.97, 7.29) | 3.23 (3.11, 3.36) |
| Suriname | 0.13 (0.09, 0.17) | 0.99 (0.79, 1.19) | 0.03 (-0.24, 0.31) | 0.92 (0.80, 1.04) | 6.86 (6.07, 7.65) | 1.52 (1.30, 1.74) |
| Sweden | 0.18 (-0.04, 0.40) | 0.29 (0.09, 0.49) | -0.43 (-0.66, -0.21) | -2.35 (-2.63, -2.06) | 1.07 (0.34, 1.80) | 0.50 (-0.03, 1.03) |
| Switzerland | -0.01 (-0.03, 0.01) | 0.14 (-0.04, 0.31) | -2.23 (-2.41, -2.06) | -1.58 (-2.06, -1.10) | -1.45 (-1.95, -0.95) | 0.05 (-0.31, 0.41) |
| Syrian Arab Republic | 0.31 (0.21, 0.41) | 1.50 (1.30, 1.71) | -0.29 (-0.60, 0.02) | 1.42 (1.27, 1.58) | 3.47 (2.95, 4.00) | 3.09 (2.82, 3.37) |
| Taiwan (Province of China) | 0.44 (0.41, 0.47) | 4.33 (3.96, 4.71) | -3.64 (-4.10, -3.17) | 1.86 (1.55, 2.16) | 2.85 (2.42, 3.27) | 3.71 (3.03, 4.40) |
| Tajikistan | 0.06 (0.04, 0.07) | -0.31 (-0.49, -0.13) | -1.95 (-2.31, -1.60) | 0.31 (0.22, 0.39) | 2.75 (2.00, 3.51) | 0.04 (-0.12, 0.20) |
| Thailand | 0.30 (0.27, 0.32) | 1.39 (1.22, 1.55) | -0.54 (-0.90, -0.18) | 2.11 (1.87, 2.34) | 6.49 (6.14, 6.84) | 3.22 (3.02, 3.42) |
| Timor-Leste | 0.31 (0.29, 0.33) | 1.30 (1.04, 1.56) | 0.27 (-0.15, 0.69) | 3.17 (2.86, 3.48) | 5.00 (4.26, 5.74) | 2.41 (2.28, 2.54) |
| Togo | 0.09 (0.07, 0.11) | 1.69 (1.57, 1.82) | 0.53 (0.38, 0.69) | 1.73 (1.64, 1.82) | 0.92 (0.33, 1.50) | 2.41 (2.32, 2.49) |
| Tokelau | 0.03 (-0.03, 0.08) | 1.01 (0.95, 1.07) | -0.33 (-0.52, -0.13) | 2.06 (1.87, 2.26) | 5.04 (4.66, 5.42) | 2.07 (2.02, 2.13) |
| Tonga | 0.10 (0.07, 0.13) | 0.54 (0.44, 0.63) | -0.60 (-0.77, -0.43) | 1.74 (1.60, 1.87) | 2.74 (2.57, 2.90) | 1.12 (1.05, 1.19) |
| Trinidad and Tobago | 0.07 (0.05, 0.10) | 1.17 (0.92, 1.43) | 0.17 (-0.03, 0.37) | 0.42 (0.24, 0.60) | 10.33 (8.81, 11.86) | 1.27 (1.09, 1.44) |
| Tunisia | 0.23 (0.22, 0.24) | 1.92 (1.86, 1.98) | -0.26 (-0.37, -0.15) | 1.47 (1.38, 1.57) | 3.48 (3.37, 3.59) | 2.75 (2.70, 2.80) |
| Turkey | 0.24 (0.19, 0.30) | 2.08 (1.80, 2.37) | -1.00 (-1.17, -0.83) | 0.71 (0.61, 0.81) | 5.12 (4.75, 5.50) | 3.82 (3.57, 4.06) |
| Turkmenistan | 0.02 (-0.01, 0.05) | -0.03 (-0.75, 0.69) | 1.21 (0.81, 1.62) | 3.80 (1.65, 6.00) | 5.25 (4.44, 6.06) | 2.64 (2.30, 2.99) |
| Tuvalu | -0.34 (-0.38, -0.29) | 0.90 (0.83, 0.96) | -0.85 (-0.95, -0.75) | 2.05 (1.82, 2.28) | 5.08 (4.90, 5.26) | 2.57 (2.40, 2.74) |
| Uganda | 0.20 (0.18, 0.22) | 1.67 (1.48, 1.86) | -0.16 (-0.42, 0.09) | 1.75 (1.49, 2.00) | 4.07 (3.54, 4.60) | 1.51 (1.44, 1.59) |
| Ukraine | 0.01 (-0.01, 0.03) | 0.53 (-0.54, 1.61) | -2.90 (-3.31, -2.49) | 0.38 (0.06, 0.69) | 2.33 (1.97, 2.69) | 1.48 (1.32, 1.65) |
| United Arab Emirates | -0.23 (-0.32, -0.14) | 2.10 (1.62, 2.58) | -1.45 (-1.66, -1.24) | 1.49 (1.14, 1.84) | 3.32 (3.05, 3.59) | 3.84 (3.41, 4.27) |
| United Kingdom | -0.19 (-0.33, -0.05) | 2.66 (2.25, 3.06) | -2.93 (-3.32, -2.54) | -1.17 (-1.38, -0.96) | -0.63 (-0.91, -0.34) | 1.88 (1.51, 2.24) |
| United Republic of Tanzania | 0.10 (0.06, 0.14) | 0.67 (0.53, 0.81) | -0.64 (-0.80, -0.48) | 1.22 (1.10, 1.34) | 3.82 (3.38, 4.26) | 0.89 (0.80, 0.98) |
| United States Virgin Islands | -0.02 (-0.08, 0.04) | -0.81 (-1.02, -0.59) | -1.52 (-1.75, -1.28) | 1.19 (0.74, 1.65) | 9.55 (8.86, 10.24) | -1.18 (-1.68, -0.67) |
| United States of America | 0.38 (0.14, 0.62) | 1.66 (1.57, 1.75) | -1.49 (-1.72, -1.25) | -1.46 (-1.64, -1.27) | 1.27 (1.13, 1.40) | -0.45 (-0.56, -0.34) |
| Uruguay | 0.26 (0.21, 0.31) | 0.35 (0.25, 0.46) | 0.31 (0.10, 0.53) | 0.35 (0.24, 0.47) | 4.15 (3.83, 4.47) | 1.53 (1.08, 1.98) |
| Uzbekistan | 0.29 (0.28, 0.31) | 0.74 (0.45, 1.04) | 0.13 (-0.10, 0.37) | 1.41 (1.04, 1.78) | 4.44 (3.70, 5.19) | 1.33 (0.52, 2.15) |
| Vanuatu | 0.37 (0.35, 0.39) | 1.08 (0.88, 1.28) | -0.31 (-0.50, -0.12) | 2.30 (2.15, 2.44) | 0.99 (0.60, 1.38) | 0.93 (0.89, 0.98) |
| Venezuela (Bolivarian Republic of) | -0.07 (-0.11, -0.03) | 0.57 (0.20, 0.94) | 0.66 (0.40, 0.93) | 3.85 (2.69, 5.02) | 10.38 (8.90, 11.87) | 2.18 (1.66, 2.71) |
| Viet Nam | 0.27 (0.25, 0.30) | 1.93 (1.83, 2.04) | 0.33 (0.21, 0.44) | 2.16 (2.03, 2.29) | 5.88 (5.65, 6.11) | 3.55 (3.43, 3.67) |
| Yemen | 0.16 (0.13, 0.18) | 2.16 (2.00, 2.32) | -0.33 (-0.45, -0.22) | 2.65 (2.48, 2.83) | 5.96 (5.46, 6.45) | 2.97 (2.77, 3.17) |
| Zambia | -0.07 (-0.09, -0.05) | 1.70 (1.29, 2.12) | -0.61 (-0.92, -0.29) | 1.42 (1.19, 1.65) | 10.72 (8.90, 12.58) | 3.78 (3.15, 4.41) |
| Zimbabwe | 0.06 (0.00, 0.11) | 2.98 (2.30, 3.66) | 2.62 (1.81, 3.43) | 2.65 (2.19, 3.11) | 0.94 (0.30, 1.59) | 0.39 (0.10, 0.69) |

The location name is in alphabetical order. EAPC estimated annual percentage change, ASIR age-standardized incidence rate, CI confidence interval.

**Table S6. EAPC of ASPR for 6 genital neoplasms in 204 countries and territories (1990-2021, 95% CI)**

| Location name | Uterine fibroids | Uterine cancer | Cervical cancer | Ovarian cancer | Testicular cancer | Prostate cancer |
| --- | --- | --- | --- | --- | --- | --- |
| Afghanistan | -0.39 (-0.47, -0.31) | -0.39 (-0.47, -0.31) | -0.63 (-0.74, -0.51) | 1.86 (1.68, 2.04) | 5.26 (4.92, 5.60) | 0.76 (0.67, 0.84) |
| Albania | 0.34 (0.26, 0.42) | 0.34 (0.26, 0.42) | 0.46 (0.15, 0.76) | 0.87 (0.64, 1.09) | 4.26 (3.82, 4.70) | 1.90 (1.74, 2.07) |
| Algeria | 0.21 (0.20, 0.22) | 0.21 (0.20, 0.22) | -1.30 (-1.49, -1.11) | 0.89 (0.83, 0.94) | 2.72 (2.46, 2.98) | 1.95 (1.76, 2.13) |
| American Samoa | 0.20 (0.15, 0.25) | 0.20 (0.15, 0.25) | 0.53 (0.41, 0.65) | 1.97 (1.84, 2.11) | 4.33 (3.30, 5.37) | 1.06 (0.87, 1.24) |
| Andorra | 0.38 (0.31, 0.45) | 0.38 (0.31, 0.45) | -0.64 (-0.88, -0.40) | -0.64 (-0.83, -0.45) | 1.03 (0.69, 1.37) | 1.02 (0.72, 1.32) |
| Angola | 0.53 (0.50, 0.56) | 0.53 (0.50, 0.56) | -0.27 (-0.38, -0.16) | 2.40 (2.26, 2.53) | 1.52 (1.29, 1.76) | 0.76 (0.65, 0.86) |
| Antigua and Barbuda | -0.04 (-0.11, 0.03) | -0.04 (-0.11, 0.03) | -0.36 (-0.54, -0.18) | 1.11 (0.95, 1.27) | 7.16 (5.79, 8.56) | 0.83 (0.42, 1.24) |
| Argentina | 0.18 (0.13, 0.23) | 0.18 (0.13, 0.23) | 0.37 (0.15, 0.59) | -0.41 (-0.58, -0.24) | 2.88 (2.55, 3.22) | 0.56 (0.14, 0.99) |
| Armenia | 0.22 (0.19, 0.26) | 0.22 (0.19, 0.26) | -1.21 (-1.70, -0.71) | 0.98 (0.78, 1.19) | 3.00 (2.55, 3.45) | 3.03 (2.77, 3.29) |
| Australia | 0.09 (0.07, 0.11) | 0.09 (0.07, 0.11) | -1.78 (-2.02, -1.53) | -2.28 (-2.69, -1.87) | 0.40 (-0.02, 0.83) | -0.38 (-1.21, 0.45) |
| Austria | -0.44 (-0.50, -0.38) | -0.44 (-0.50, -0.38) | -2.37 (-2.56, -2.17) | -2.07 (-2.17, -1.98) | 0.42 (0.05, 0.80) | 0.68 (0.23, 1.14) |
| Azerbaijan | 0.12 (0.09, 0.15) | 0.12 (0.09, 0.15) | -1.49 (-1.66, -1.33) | 1.10 (0.75, 1.46) | 2.81 (2.45, 3.16) | 1.58 (1.35, 1.80) |
| Bahamas | 0.05 (0.01, 0.09) | 0.05 (0.01, 0.09) | -0.55 (-0.69, -0.41) | 0.63 (0.52, 0.75) | 7.42 (6.02, 8.84) | 1.22 (0.93, 1.50) |
| Bahrain | -0.60 (-0.77, -0.44) | -0.60 (-0.77, -0.44) | -2.44 (-2.79, -2.09) | -0.11 (-0.24, 0.02) | 3.61 (2.89, 4.34) | 2.14 (1.97, 2.31) |
| Bangladesh | 0.72 (0.65, 0.78) | 0.72 (0.65, 0.78) | -1.19 (-1.41, -0.97) | 1.56 (1.48, 1.64) | 1.84 (1.51, 2.18) | 0.14 (-0.00, 0.29) |
| Barbados | 0.01 (-0.01, 0.03) | 0.01 (-0.01, 0.03) | -0.45 (-0.55, -0.36) | 0.35 (0.22, 0.48) | 4.62 (2.76, 6.51) | 1.07 (0.91, 1.23) |
| Belarus | 0.14 (0.12, 0.16) | 0.14 (0.12, 0.16) | -0.98 (-1.32, -0.63) | 0.17 (-0.37, 0.71) | 3.16 (3.01, 3.32) | 3.66 (3.32, 4.00) |
| Belgium | 0.05 (-0.01, 0.10) | 0.05 (-0.01, 0.10) | -1.34 (-1.50, -1.17) | -2.13 (-2.26, -2.01) | 0.84 (0.62, 1.06) | -0.20 (-0.65, 0.26) |
| Belize | 0.23 (0.16, 0.29) | 0.23 (0.16, 0.29) | 0.30 (-0.04, 0.64) | 1.47 (1.12, 1.83) | 7.94 (6.42, 9.48) | 1.80 (1.06, 2.54) |
| Benin | 0.08 (0.03, 0.12) | 0.08 (0.03, 0.12) | -0.25 (-0.35, -0.15) | 1.21 (1.13, 1.30) | -1.09 (-1.32, -0.87) | 1.67 (1.59, 1.74) |
| Bermuda | -0.03 (-0.07, 0.01) | -0.03 (-0.07, 0.01) | -2.08 (-2.38, -1.79) | -1.15 (-1.36, -0.94) | 8.25 (6.86, 9.65) | 1.67 (1.36, 1.98) |
| Bhutan | 0.35 (0.33, 0.38) | 0.35 (0.33, 0.38) | -1.84 (-2.13, -1.56) | 1.48 (1.43, 1.54) | 2.36 (2.14, 2.59) | 1.23 (1.20, 1.27) |
| Bolivia (Plurinational State of) | -0.07 (-0.09, -0.04) | -0.07 (-0.09, -0.04) | -1.35 (-1.48, -1.23) | 2.21 (2.04, 2.38) | 3.65 (3.42, 3.88) | 1.11 (1.05, 1.17) |
| Bosnia and Herzegovina | 0.29 (0.24, 0.34) | 0.29 (0.24, 0.34) | 0.36 (0.12, 0.61) | 0.97 (0.80, 1.13) | 3.05 (2.35, 3.74) | 3.19 (2.87, 3.51) |
| Botswana | 0.14 (-0.12, 0.40) | 0.14 (-0.12, 0.40) | -0.03 (-0.61, 0.56) | 1.58 (1.38, 1.79) | 1.10 (0.89, 1.31) | 0.49 (0.37, 0.62) |
| Brazil | 1.43 (1.33, 1.53) | 1.43 (1.33, 1.53) | -0.86 (-1.04, -0.69) | 0.23 (0.11, 0.35) | 3.95 (3.79, 4.11) | 0.81 (0.45, 1.18) |
| Brunei Darussalam | 0.11 (-0.03, 0.25) | 0.11 (-0.03, 0.25) | -0.83 (-1.08, -0.59) | 0.88 (0.75, 1.01) | 1.82 (1.67, 1.97) | 1.19 (0.98, 1.41) |
| Bulgaria | -0.00 (-0.02, 0.02) | -0.00 (-0.02, 0.02) | 0.38 (0.17, 0.60) | 0.95 (0.68, 1.22) | 2.30 (1.75, 2.85) | 2.31 (2.16, 2.46) |
| Burkina Faso | -0.00 (-0.06, 0.05) | -0.00 (-0.06, 0.05) | -0.52 (-0.60, -0.45) | 1.19 (1.10, 1.28) | -0.95 (-1.17, -0.73) | 2.06 (1.94, 2.18) |
| Burundi | -0.28 (-0.32, -0.25) | -0.28 (-0.32, -0.25) | -2.56 (-2.82, -2.29) | -0.33 (-0.46, -0.21) | 1.03 (0.82, 1.24) | 0.25 (0.15, 0.34) |
| Cabo Verde | -0.45 (-0.48, -0.42) | -0.45 (-0.48, -0.42) | -1.14 (-1.29, -0.99) | 4.24 (3.43, 5.06) | 2.22 (2.07, 2.37) | 2.98 (2.61, 3.35) |
| Cambodia | -0.06 (-0.08, -0.03) | -0.06 (-0.08, -0.03) | -1.14 (-1.25, -1.04) | 2.80 (2.75, 2.86) | 2.73 (2.63, 2.82) | 1.74 (1.65, 1.84) |
| Cameroon | -0.04 (-0.07, -0.02) | -0.04 (-0.07, -0.02) | -0.22 (-0.32, -0.12) | 1.28 (1.18, 1.38) | -0.81 (-1.03, -0.59) | 1.92 (1.84, 1.99) |
| Canada | 0.09 (-0.11, 0.29) | 0.09 (-0.11, 0.29) | 0.56 (0.36, 0.76) | -0.72 (-0.92, -0.52) | 2.43 (2.25, 2.61) | -1.93 (-2.30, -1.56) |
| Central African Republic | 0.01 (-0.04, 0.06) | 0.01 (-0.04, 0.06) | -0.70 (-0.83, -0.57) | 0.74 (0.66, 0.81) | 0.30 (0.23, 0.36) | 0.20 (0.17, 0.23) |
| Chad | 0.14 (0.11, 0.16) | 0.14 (0.11, 0.16) | 0.44 (0.33, 0.55) | 1.14 (1.09, 1.18) | -0.44 (-0.62, -0.27) | 2.89 (2.73, 3.04) |
| Chile | -0.08 (-0.34, 0.19) | -0.08 (-0.34, 0.19) | -1.96 (-2.20, -1.71) | 0.31 (-0.05, 0.68) | 4.55 (4.08, 5.02) | 1.83 (1.48, 2.19) |
| China | 0.24 (0.10, 0.39) | 0.24 (0.10, 0.39) | 0.92 (0.72, 1.11) | -0.41 (-0.56, -0.26) | 2.80 (2.45, 3.15) | 2.20 (2.08, 2.32) |
| Colombia | -0.07 (-0.10, -0.03) | -0.07 (-0.10, -0.03) | -0.83 (-1.10, -0.57) | 0.82 (0.69, 0.95) | 5.19 (4.83, 5.55) | 0.81 (0.46, 1.18) |
| Comoros | -0.18 (-0.21, -0.16) | -0.18 (-0.21, -0.16) | -1.18 (-1.35, -1.00) | 1.21 (1.08, 1.34) | 1.47 (1.01, 1.93) | 0.45 (0.41, 0.50) |
| Congo | 0.09 (0.05, 0.14) | 0.09 (0.05, 0.14) | -0.88 (-1.08, -0.68) | 1.24 (1.14, 1.34) | 1.76 (1.60, 1.91) | 0.95 (0.79, 1.11) |
| Cook Islands | 0.63 (0.60, 0.66) | 0.63 (0.60, 0.66) | -0.44 (-0.70, -0.19) | 1.68 (1.59, 1.77) | 2.77 (2.70, 2.83) | 0.94 (0.79, 1.09) |
| Costa Rica | 0.11 (0.09, 0.14) | 0.11 (0.09, 0.14) | -1.30 (-1.66, -0.94) | 1.76 (1.49, 2.03) | 4.47 (4.23, 4.70) | 2.22 (1.83, 2.61) |
| Croatia | 0.13 (0.04, 0.22) | 0.13 (0.04, 0.22) | -1.25 (-1.56, -0.95) | -0.35 (-0.57, -0.13) | 2.03 (1.60, 2.45) | 2.07 (1.79, 2.36) |
| Cuba | -0.03 (-0.06, -0.00) | -0.03 (-0.06, -0.00) | -0.85 (-1.05, -0.64) | 0.90 (0.63, 1.18) | 6.47 (5.18, 7.77) | 1.92 (1.80, 2.03) |
| Cyprus | 0.18 (0.07, 0.29) | 0.18 (0.07, 0.29) | -0.70 (-0.90, -0.49) | -0.40 (-0.61, -0.19) | 3.21 (2.64, 3.78) | 1.61 (1.32, 1.89) |
| Czechia | 0.14 (0.05, 0.24) | 0.14 (0.05, 0.24) | -2.16 (-2.32, -2.00) | -0.41 (-0.74, -0.09) | 2.43 (2.15, 2.71) | 1.95 (1.40, 2.50) |
| Côte d'Ivoire | 0.18 (0.13, 0.23) | 0.18 (0.13, 0.23) | 0.25 (0.08, 0.42) | 1.26 (1.20, 1.33) | 1.04 (0.81, 1.28) | 0.52 (0.48, 0.57) |
| Democratic People's Republic of Korea | -0.18 (-0.21, -0.16) | -0.18 (-0.21, -0.16) | 0.53 (0.41, 0.66) | 0.97 (0.90, 1.03) | 1.18 (0.91, 1.44) | 1.86 (1.69, 2.04) |
| Democratic Republic of the Congo | -0.03 (-0.05, -0.00) | -0.03 (-0.05, -0.00) | -0.04 (-0.08, 0.00) | 1.36 (1.13, 1.59) | 1.23 (0.90, 1.55) | 0.16 (-0.18, 0.50) |
| Denmark | 0.07 (-0.05, 0.18) | 0.07 (-0.05, 0.18) | -2.57 (-2.86, -2.28) | -1.51 (-2.05, -0.97) | 0.35 (-0.13, 0.83) | 2.22 (1.59, 2.86) |
| Djibouti | 0.37 (0.33, 0.41) | 0.37 (0.33, 0.41) | -0.54 (-0.65, -0.43) | 0.73 (0.67, 0.80) | 1.50 (1.37, 1.63) | 1.00 (0.97, 1.04) |
| Dominica | 0.17 (0.14, 0.21) | 0.17 (0.14, 0.21) | -0.85 (-0.96, -0.75) | 0.06 (-0.04, 0.16) | 5.89 (5.13, 6.66) | 0.79 (0.52, 1.06) |
| Dominican Republic | -0.05 (-0.09, -0.01) | -0.05 (-0.09, -0.01) | 0.22 (0.09, 0.36) | 1.23 (1.11, 1.35) | 2.18 (1.34, 3.03) | 0.93 (0.47, 1.39) |
| Ecuador | -0.09 (-0.14, -0.05) | -0.09 (-0.14, -0.05) | -0.54 (-0.78, -0.29) | 6.70 (4.75, 8.67) | 7.93 (5.57, 10.34) | 1.07 (0.62, 1.52) |
| Egypt | 0.03 (-0.00, 0.06) | 0.03 (-0.00, 0.06) | 2.24 (1.78, 2.71) | 3.30 (2.76, 3.84) | 4.29 (4.08, 4.49) | 4.31 (4.02, 4.61) |
| El Salvador | 0.25 (0.20, 0.29) | 0.25 (0.20, 0.29) | 0.33 (-0.06, 0.73) | 2.57 (2.31, 2.84) | 5.34 (5.03, 5.64) | 2.60 (2.14, 3.06) |
| Equatorial Guinea | -0.13 (-0.27, 0.01) | -0.13 (-0.27, 0.01) | -0.73 (-0.90, -0.56) | 2.66 (2.48, 2.84) | 4.20 (3.97, 4.43) | 1.95 (1.79, 2.11) |
| Eritrea | -0.17 (-0.21, -0.13) | -0.17 (-0.21, -0.13) | -0.58 (-0.65, -0.51) | 1.34 (1.21, 1.47) | 1.70 (1.62, 1.77) | 0.57 (0.46, 0.67) |
| Estonia | -0.03 (-0.05, -0.01) | -0.03 (-0.05, -0.01) | -1.64 (-1.81, -1.48) | -1.09 (-1.89, -0.29) | 0.90 (0.48, 1.32) | 4.64 (3.91, 5.37) |
| Eswatini | -0.26 (-0.31, -0.21) | -0.26 (-0.31, -0.21) | 2.05 (1.17, 2.94) | 1.35 (1.20, 1.49) | 1.10 (1.03, 1.17) | 0.89 (0.67, 1.12) |
| Ethiopia | 0.14 (0.11, 0.18) | 0.14 (0.11, 0.18) | -3.02 (-3.30, -2.74) | 1.25 (1.07, 1.42) | 2.08 (1.84, 2.31) | 0.54 (0.46, 0.61) |
| Fiji | 0.17 (0.15, 0.19) | 0.17 (0.15, 0.19) | -0.60 (-0.79, -0.40) | 0.53 (0.41, 0.66) | 1.31 (0.79, 1.83) | 0.35 (0.17, 0.52) |
| Finland | -0.33 (-0.47, -0.20) | -0.33 (-0.47, -0.20) | -0.98 (-1.16, -0.80) | -1.41 (-1.59, -1.24) | 2.11 (1.82, 2.41) | 1.79 (1.17, 2.42) |
| France | 0.14 (0.06, 0.21) | 0.14 (0.06, 0.21) | -0.74 (-0.86, -0.62) | -1.10 (-1.22, -0.98) | 2.44 (2.11, 2.77) | 1.25 (0.96, 1.54) |
| Gabon | 0.51 (0.48, 0.55) | 0.51 (0.48, 0.55) | -0.52 (-0.77, -0.27) | 1.05 (0.97, 1.12) | 1.59 (1.48, 1.71) | 1.00 (0.93, 1.06) |
| Gambia | 0.24 (0.18, 0.31) | 0.24 (0.18, 0.31) | 0.59 (0.37, 0.82) | 1.72 (1.50, 1.95) | 0.73 (0.35, 1.11) | 0.95 (0.85, 1.06) |
| Georgia | 0.52 (0.46, 0.58) | 0.52 (0.46, 0.58) | -0.38 (-0.93, 0.18) | 5.98 (5.57, 6.39) | 1.15 (0.42, 1.90) | 4.57 (3.90, 5.26) |
| Germany | 0.15 (0.03, 0.27) | 0.15 (0.03, 0.27) | -1.67 (-2.07, -1.27) | -2.13 (-2.22, -2.04) | 0.77 (0.42, 1.13) | 1.47 (0.96, 1.98) |
| Ghana | 0.19 (0.15, 0.23) | 0.19 (0.15, 0.23) | 0.08 (0.02, 0.13) | 2.17 (2.13, 2.22) | -0.42 (-0.67, -0.17) | 0.08 (-0.09, 0.26) |
| Greece | 0.11 (0.09, 0.13) | 0.11 (0.09, 0.13) | -1.17 (-1.36, -0.98) | -0.48 (-0.66, -0.29) | 0.74 (0.30, 1.19) | -0.25 (-0.62, 0.12) |
| Greenland | 0.39 (0.35, 0.43) | 0.39 (0.35, 0.43) | -1.98 (-2.15, -1.80) | -1.53 (-1.76, -1.30) | -0.56 (-1.20, 0.08) | 0.93 (0.82, 1.05) |
| Grenada | 0.04 (0.02, 0.06) | 0.04 (0.02, 0.06) | -0.61 (-0.89, -0.34) | 1.19 (1.06, 1.33) | 7.64 (6.38, 8.91) | 1.30 (0.21, 2.40) |
| Guam | 0.45 (0.36, 0.53) | 0.45 (0.36, 0.53) | -0.59 (-0.82, -0.35) | 2.55 (2.02, 3.09) | 4.57 (3.97, 5.17) | 0.36 (0.05, 0.67) |
| Guatemala | 0.09 (0.06, 0.12) | 0.09 (0.06, 0.12) | 0.72 (0.08, 1.37) | 3.12 (2.70, 3.54) | 4.34 (3.80, 4.87) | 2.16 (1.33, 3.00) |
| Guinea | 0.23 (0.20, 0.25) | 0.23 (0.20, 0.25) | -0.22 (-0.28, -0.16) | 1.05 (1.00, 1.10) | 1.03 (0.92, 1.13) | 1.24 (1.21, 1.27) |
| Guinea-Bissau | 0.05 (0.04, 0.07) | 0.05 (0.04, 0.07) | 0.39 (0.32, 0.46) | 1.73 (1.67, 1.78) | -0.78 (-0.94, -0.61) | 1.69 (1.60, 1.78) |
| Guyana | 0.19 (0.17, 0.21) | 0.19 (0.17, 0.21) | -0.50 (-0.77, -0.23) | 1.67 (1.27, 2.06) | 6.84 (5.38, 8.31) | 0.91 (0.63, 1.19) |
| Haiti | 0.03 (-0.00, 0.06) | 0.03 (-0.00, 0.06) | -0.99 (-1.07, -0.92) | 1.10 (1.01, 1.19) | 2.79 (2.57, 3.02) | 1.00 (0.89, 1.11) |
| Honduras | 0.27 (0.25, 0.29) | 0.27 (0.25, 0.29) | 0.49 (0.24, 0.74) | 1.60 (1.44, 1.76) | 1.41 (1.28, 1.54) | 2.16 (2.04, 2.28) |
| Hungary | 0.03 (0.01, 0.06) | 0.03 (0.01, 0.06) | -1.24 (-1.51, -0.96) | -0.53 (-0.79, -0.27) | 1.76 (1.45, 2.07) | 0.91 (0.63, 1.19) |
| Iceland | -0.15 (-0.22, -0.07) | -0.15 (-0.22, -0.07) | -1.84 (-2.14, -1.53) | -1.78 (-1.98, -1.58) | 0.86 (0.49, 1.24) | 0.11 (-0.22, 0.44) |
| India | 1.07 (0.94, 1.20) | 1.07 (0.94, 1.20) | -1.34 (-1.71, -0.98) | 1.57 (1.47, 1.68) | 1.52 (1.16, 1.88) | 0.91 (0.71, 1.11) |
| Indonesia | -0.37 (-0.49, -0.24) | -0.37 (-0.49, -0.24) | -0.54 (-0.67, -0.41) | 1.19 (1.04, 1.34) | 2.26 (2.16, 2.36) | 2.07 (2.04, 2.11) |
| Iran (Islamic Republic of) | -0.75 (-1.09, -0.41) | -0.75 (-1.09, -0.41) | -1.32 (-1.45, -1.19) | 2.17 (2.00, 2.34) | 6.88 (6.18, 7.59) | 2.82 (2.69, 2.95) |
| Iraq | -0.05 (-0.11, 0.01) | -0.05 (-0.11, 0.01) | -0.30 (-0.39, -0.21) | 1.44 (1.34, 1.54) | 4.17 (3.87, 4.47) | 3.12 (2.78, 3.47) |
| Ireland | 0.09 (0.05, 0.13) | 0.09 (0.05, 0.13) | -1.70 (-2.20, -1.19) | -1.43 (-1.61, -1.26) | 2.52 (2.08, 2.96) | 0.66 (0.15, 1.18) |
| Israel | -0.04 (-0.07, -0.01) | -0.04 (-0.07, -0.01) | -1.01 (-1.16, -0.85) | -1.58 (-1.76, -1.40) | 1.90 (1.32, 2.49) | -0.22 (-0.78, 0.34) |
| Italy | -0.28 (-0.30, -0.27) | -0.28 (-0.30, -0.27) | 2.94 (2.24, 3.65) | -0.63 (-0.78, -0.48) | 2.93 (2.52, 3.35) | 0.53 (0.06, 1.00) |
| Jamaica | 0.08 (0.05, 0.12) | 0.08 (0.05, 0.12) | -0.55 (-0.87, -0.24) | 0.62 (0.41, 0.84) | 5.60 (4.03, 7.19) | 2.32 (1.51, 3.14) |
| Japan | 0.18 (0.07, 0.28) | 0.18 (0.07, 0.28) | 0.65 (0.51, 0.80) | -0.14 (-0.32, 0.05) | 0.34 (-0.21, 0.88) | 2.80 (2.24, 3.36) |
| Jordan | -0.07 (-0.14, -0.00) | -0.07 (-0.14, -0.00) | -2.87 (-3.37, -2.37) | 0.60 (0.28, 0.92) | 5.78 (5.22, 6.34) | 2.90 (2.62, 3.18) |
| Kazakhstan | 0.18 (0.17, 0.19) | 0.18 (0.17, 0.19) | -0.21 (-0.65, 0.23) | 0.08 (-0.21, 0.37) | 2.59 (2.19, 2.99) | 2.15 (1.77, 2.53) |
| Kenya | 0.09 (0.07, 0.11) | 0.09 (0.07, 0.11) | 0.41 (0.26, 0.57) | 1.90 (1.83, 1.96) | 1.45 (1.23, 1.66) | 1.77 (1.64, 1.91) |
| Kiribati | 0.34 (0.29, 0.38) | 0.34 (0.29, 0.38) | 0.00 (-0.05, 0.05) | 1.85 (1.65, 2.06) | 1.11 (1.02, 1.20) | 0.49 (0.44, 0.53) |
| Kuwait | 1.03 (0.82, 1.24) | 1.03 (0.82, 1.24) | -3.06 (-3.66, -2.46) | -0.60 (-0.93, -0.26) | 0.21 (-1.90, 2.37) | 3.74 (2.99, 4.49) |
| Kyrgyzstan | 0.15 (0.14, 0.17) | 0.15 (0.14, 0.17) | -0.56 (-0.86, -0.27) | 3.39 (2.67, 4.13) | 0.63 (0.04, 1.22) | 0.87 (0.49, 1.25) |
| Lao People's Democratic Republic | 0.20 (0.19, 0.21) | 0.20 (0.19, 0.21) | -1.95 (-2.04, -1.87) | 2.41 (2.31, 2.50) | 1.79 (1.66, 1.92) | 1.31 (1.28, 1.34) |
| Latvia | 0.04 (-0.06, 0.14) | 0.04 (-0.06, 0.14) | -1.58 (-1.81, -1.36) | 0.59 (0.19, 0.99) | 1.52 (1.05, 1.99) | 3.81 (3.51, 4.11) |
| Lebanon | -0.14 (-0.18, -0.09) | -0.14 (-0.18, -0.09) | -2.32 (-2.41, -2.22) | 1.00 (0.81, 1.19) | 6.19 (5.86, 6.52) | 3.83 (3.43, 4.25) |
| Lesotho | -0.28 (-0.31, -0.26) | -0.28 (-0.31, -0.26) | 3.83 (3.02, 4.64) | 2.13 (1.90, 2.36) | 1.80 (1.73, 1.86) | 1.38 (1.31, 1.45) |
| Liberia | -0.05 (-0.09, -0.00) | -0.05 (-0.09, -0.00) | 0.63 (0.49, 0.76) | 2.10 (1.99, 2.21) | 0.09 (-0.09, 0.27) | 1.96 (1.86, 2.06) |
| Libya | 0.15 (0.08, 0.21) | 0.15 (0.08, 0.21) | 0.77 (0.60, 0.93) | 1.81 (1.61, 2.01) | 2.80 (2.41, 3.19) | 2.07 (1.82, 2.32) |
| Lithuania | -0.10 (-0.15, -0.04) | -0.10 (-0.15, -0.04) | -1.15 (-1.43, -0.86) | -0.54 (-1.03, -0.05) | 1.70 (1.29, 2.11) | 3.68 (3.14, 4.23) |
| Luxembourg | -0.19 (-0.28, -0.11) | -0.19 (-0.28, -0.11) | -2.12 (-2.33, -1.90) | -1.71 (-1.88, -1.53) | -0.50 (-0.88, -0.11) | 0.59 (0.31, 0.86) |
| Madagascar | 0.07 (0.05, 0.09) | 0.07 (0.05, 0.09) | -0.71 (-0.81, -0.62) | 0.62 (0.45, 0.79) | 0.78 (0.62, 0.94) | -0.48 (-0.66, -0.31) |
| Malawi | 0.06 (0.03, 0.09) | 0.06 (0.03, 0.09) | 0.17 (-0.15, 0.50) | 1.61 (1.52, 1.70) | 2.07 (1.97, 2.18) | 1.12 (1.03, 1.21) |
| Malaysia | 0.07 (0.03, 0.12) | 0.07 (0.03, 0.12) | -0.54 (-0.91, -0.17) | 1.49 (1.10, 1.89) | 2.63 (2.44, 2.81) | 1.83 (1.68, 1.98) |
| Maldives | -0.72 (-1.04, -0.41) | -0.72 (-1.04, -0.41) | -4.33 (-4.45, -4.22) | 0.72 (0.25, 1.19) | 4.91 (4.52, 5.30) | 0.54 (0.38, 0.70) |
| Mali | 0.22 (0.20, 0.24) | 0.22 (0.20, 0.24) | -0.93 (-1.01, -0.85) | 0.77 (0.72, 0.81) | 1.03 (0.88, 1.18) | 1.13 (1.07, 1.20) |
| Malta | -0.08 (-0.20, 0.03) | -0.08 (-0.20, 0.03) | -1.13 (-1.56, -0.69) | -1.04 (-1.21, -0.87) | 2.18 (1.74, 2.63) | 0.42 (0.18, 0.66) |
| Marshall Islands | 0.25 (0.20, 0.31) | 0.25 (0.20, 0.31) | -0.08 (-0.24, 0.08) | 1.98 (1.87, 2.10) | 1.36 (1.31, 1.41) | 1.87 (1.75, 1.99) |
| Mauritania | 0.20 (0.14, 0.25) | 0.20 (0.14, 0.25) | -0.29 (-0.41, -0.17) | 1.38 (1.30, 1.47) | -0.17 (-0.39, 0.04) | 2.92 (2.83, 3.00) |
| Mauritius | 0.24 (0.20, 0.29) | 0.24 (0.20, 0.29) | -2.06 (-2.58, -1.55) | 1.52 (1.10, 1.94) | 4.11 (3.21, 5.02) | 1.42 (1.05, 1.79) |
| Mexico | -0.16 (-0.19, -0.13) | -0.16 (-0.19, -0.13) | -2.69 (-2.90, -2.48) | 1.34 (1.29, 1.39) | 4.63 (4.43, 4.83) | 0.97 (0.67, 1.26) |
| Micronesia (Federated States of) | 0.16 (0.08, 0.25) | 0.16 (0.08, 0.25) | -0.31 (-0.40, -0.23) | 1.97 (1.83, 2.12) | 1.19 (1.16, 1.23) | 0.93 (0.89, 0.96) |
| Monaco | 0.16 (0.11, 0.21) | 0.16 (0.11, 0.21) | -0.14 (-0.25, -0.03) | -0.71 (-0.77, -0.66) | 1.59 (1.43, 1.76) | 1.54 (1.35, 1.73) |
| Mongolia | 0.21 (0.19, 0.22) | 0.21 (0.19, 0.22) | -0.56 (-0.74, -0.37) | 0.90 (0.77, 1.02) | 2.57 (2.20, 2.93) | 2.46 (2.29, 2.63) |
| Montenegro | 0.27 (0.23, 0.30) | 0.27 (0.23, 0.30) | -0.09 (-0.43, 0.26) | 0.16 (-0.12, 0.45) | 2.99 (2.69, 3.29) | 2.06 (1.70, 2.43) |
| Morocco | 0.02 (-0.02, 0.05) | 0.02 (-0.02, 0.05) | 0.01 (-0.07, 0.10) | 1.62 (1.58, 1.67) | 2.39 (2.19, 2.58) | 2.28 (2.00, 2.56) |
| Mozambique | 0.10 (0.09, 0.12) | 0.10 (0.09, 0.12) | 0.61 (0.43, 0.79) | 1.35 (1.25, 1.45) | 1.99 (1.90, 2.08) | 0.61 (0.57, 0.65) |
| Myanmar | 0.40 (0.37, 0.43) | 0.40 (0.37, 0.43) | -2.16 (-2.34, -1.98) | 1.18 (1.08, 1.29) | 1.63 (1.39, 1.88) | 1.15 (1.13, 1.18) |
| Namibia | 0.03 (0.01, 0.05) | 0.03 (0.01, 0.05) | 1.38 (1.13, 1.63) | 1.00 (0.86, 1.15) | 1.58 (1.44, 1.73) | 2.73 (2.51, 2.95) |
| Nauru | 0.27 (0.24, 0.30) | 0.27 (0.24, 0.30) | 0.28 (0.07, 0.49) | 2.16 (2.08, 2.23) | 0.18 (-0.06, 0.41) | -0.23 (-0.31, -0.16) |
| Nepal | 0.26 (0.19, 0.34) | 0.26 (0.19, 0.34) | -1.09 (-1.58, -0.61) | 1.75 (1.67, 1.83) | 1.22 (1.00, 1.44) | 0.77 (0.63, 0.90) |
| Netherlands | 0.12 (0.08, 0.15) | 0.12 (0.08, 0.15) | -1.04 (-1.15, -0.94) | -1.91 (-2.05, -1.76) | 1.77 (1.54, 2.00) | 0.90 (0.51, 1.29) |
| New Zealand | -0.63 (-0.72, -0.54) | -0.63 (-0.72, -0.54) | -3.24 (-3.68, -2.81) | -2.21 (-2.42, -2.00) | -0.04 (-0.55, 0.46) | -0.63 (-0.86, -0.40) |
| Nicaragua | 0.02 (-0.02, 0.06) | 0.02 (-0.02, 0.06) | -0.96 (-1.11, -0.81) | 2.12 (1.80, 2.43) | 4.72 (4.50, 4.95) | 1.96 (1.62, 2.30) |
| Niger | 0.28 (0.24, 0.32) | 0.28 (0.24, 0.32) | 0.07 (0.01, 0.13) | 1.38 (1.33, 1.44) | -1.33 (-1.52, -1.13) | 2.16 (1.99, 2.34) |
| Nigeria | 0.44 (0.40, 0.49) | 0.44 (0.40, 0.49) | 0.21 (0.12, 0.31) | 2.26 (1.99, 2.52) | 1.84 (1.59, 2.09) | 1.36 (1.24, 1.48) |
| Niue | 0.30 (0.25, 0.35) | 0.30 (0.25, 0.35) | -0.70 (-0.85, -0.55) | 1.48 (1.36, 1.61) | 1.51 (1.43, 1.59) | 1.53 (1.38, 1.68) |
| North Macedonia | 0.11 (0.10, 0.13) | 0.11 (0.10, 0.13) | -0.57 (-1.01, -0.14) | 0.45 (0.19, 0.70) | 3.06 (2.66, 3.45) | 2.09 (1.76, 2.42) |
| Northern Mariana Islands | 0.13 (-0.05, 0.30) | 0.13 (-0.05, 0.30) | -0.66 (-0.83, -0.49) | 3.24 (2.78, 3.70) | 2.01 (0.96, 3.08) | 1.26 (0.99, 1.52) |
| Norway | -0.46 (-0.77, -0.15) | -0.46 (-0.77, -0.15) | -1.63 (-1.90, -1.36) | -1.51 (-1.78, -1.24) | -0.33 (-1.38, 0.73) | 0.84 (0.28, 1.41) |
| Oman | 0.38 (0.14, 0.62) | 0.38 (0.14, 0.62) | -2.01 (-2.15, -1.86) | 0.77 (0.40, 1.14) | 4.19 (3.61, 4.78) | 2.76 (2.45, 3.06) |
| Pakistan | 0.32 (0.29, 0.36) | 0.32 (0.29, 0.36) | -0.02 (-0.23, 0.20) | 1.64 (1.48, 1.80) | 1.28 (1.22, 1.35) | 0.86 (0.70, 1.01) |
| Palau | -0.28 (-0.44, -0.13) | -0.28 (-0.44, -0.13) | -0.94 (-1.09, -0.79) | 0.58 (0.49, 0.67) | 1.39 (1.18, 1.60) | 0.29 (0.20, 0.38) |
| Palestine | 0.07 (0.02, 0.13) | 0.07 (0.02, 0.13) | -1.51 (-1.63, -1.40) | 1.20 (1.13, 1.27) | 2.67 (2.20, 3.15) | 1.46 (1.38, 1.54) |
| Panama | 0.13 (0.11, 0.14) | 0.13 (0.11, 0.14) | -1.71 (-1.97, -1.45) | 2.54 (2.17, 2.90) | 4.99 (4.49, 5.49) | 1.65 (1.08, 2.22) |
| Papua New Guinea | 0.28 (0.24, 0.33) | 0.28 (0.24, 0.33) | -0.87 (-0.95, -0.79) | 1.12 (1.01, 1.24) | 1.00 (0.87, 1.14) | 1.19 (1.15, 1.24) |
| Paraguay | 0.19 (0.16, 0.22) | 0.19 (0.16, 0.22) | -0.04 (-0.24, 0.16) | 1.48 (1.24, 1.71) | 4.00 (3.77, 4.23) | 2.32 (1.95, 2.69) |
| Peru | 0.05 (0.02, 0.07) | 0.05 (0.02, 0.07) | -0.36 (-0.66, -0.06) | 1.09 (0.92, 1.25) | 3.50 (3.22, 3.78) | 1.81 (1.67, 1.95) |
| Philippines | 0.42 (0.37, 0.47) | 0.42 (0.37, 0.47) | 0.29 (0.24, 0.34) | 1.40 (1.37, 1.43) | 0.35 (0.13, 0.58) | 0.57 (0.52, 0.62) |
| Poland | -0.97 (-1.35, -0.59) | -0.97 (-1.35, -0.59) | -2.26 (-2.52, -1.99) | -0.29 (-0.48, -0.10) | 3.25 (3.06, 3.44) | 2.99 (2.67, 3.32) |
| Portugal | -0.40 (-0.49, -0.31) | -0.40 (-0.49, -0.31) | -1.34 (-1.54, -1.14) | -1.27 (-1.46, -1.09) | 1.79 (1.51, 2.07) | 0.99 (0.64, 1.34) |
| Puerto Rico | -0.03 (-0.06, 0.01) | -0.03 (-0.06, 0.01) | -0.31 (-0.50, -0.12) | 1.92 (1.25, 2.60) | 8.32 (7.12, 9.53) | 0.05 (-0.21, 0.30) |
| Qatar | -0.95 (-1.39, -0.50) | -0.95 (-1.39, -0.50) | -1.72 (-2.38, -1.06) | 0.53 (0.28, 0.78) | 9.62 (8.20, 11.05) | 2.78 (2.48, 3.09) |
| Republic of Korea | 0.07 (-0.14, 0.29) | 0.07 (-0.14, 0.29) | -2.15 (-2.30, -2.00) | 0.91 (0.70, 1.13) | 3.99 (3.76, 4.22) | 5.27 (4.65, 5.89) |
| Republic of Moldova | 0.05 (0.03, 0.08) | 0.05 (0.03, 0.08) | -0.80 (-1.01, -0.59) | -0.99 (-1.38, -0.60) | 1.45 (0.98, 1.92) | 4.09 (3.40, 4.79) |
| Romania | 0.17 (0.10, 0.24) | 0.17 (0.10, 0.24) | -0.45 (-0.76, -0.14) | 0.44 (0.30, 0.57) | 3.32 (3.01, 3.63) | 3.57 (3.39, 3.75) |
| Russian Federation | 0.08 (0.06, 0.10) | 0.08 (0.06, 0.10) | 1.23 (1.08, 1.39) | -0.40 (-0.58, -0.23) | 2.18 (1.82, 2.55) | 4.44 (4.20, 4.68) |
| Rwanda | 0.13 (0.07, 0.18) | 0.13 (0.07, 0.18) | -3.19 (-3.61, -2.76) | 0.97 (0.89, 1.05) | 1.85 (1.52, 2.17) | -0.21 (-0.38, -0.05) |
| Saint Kitts and Nevis | 0.00 (-0.03, 0.03) | 0.00 (-0.03, 0.03) | -2.18 (-2.44, -1.92) | -0.03 (-0.17, 0.10) | 6.66 (5.38, 7.96) | 2.35 (1.95, 2.75) |
| Saint Lucia | -0.08 (-0.13, -0.03) | -0.08 (-0.13, -0.03) | -1.97 (-2.14, -1.79) | -0.10 (-0.23, 0.03) | 7.44 (6.01, 8.88) | 0.70 (0.40, 1.00) |
| Saint Vincent and the Grenadines | 0.21 (0.20, 0.23) | 0.21 (0.20, 0.23) | -1.23 (-1.40, -1.06) | 0.15 (-0.01, 0.32) | 6.78 (5.52, 8.04) | 1.64 (1.34, 1.93) |
| Samoa | 0.27 (0.26, 0.29) | 0.27 (0.26, 0.29) | 0.54 (0.41, 0.68) | 1.08 (0.98, 1.17) | 1.23 (1.16, 1.30) | 0.50 (0.45, 0.55) |
| San Marino | 0.24 (0.18, 0.30) | 0.24 (0.18, 0.30) | -0.69 (-1.02, -0.36) | -1.06 (-1.33, -0.80) | 0.73 (0.34, 1.13) | 0.13 (-0.35, 0.61) |
| Sao Tome and Principe | -0.13 (-0.19, -0.08) | -0.13 (-0.19, -0.08) | -0.31 (-0.66, 0.04) | 1.61 (1.47, 1.74) | 0.82 (0.60, 1.04) | 2.17 (2.10, 2.24) |
| Saudi Arabia | 0.31 (0.26, 0.36) | 0.31 (0.26, 0.36) | -0.14 (-0.39, 0.11) | 1.19 (0.91, 1.48) | 6.32 (5.94, 6.71) | 3.05 (2.91, 3.20) |
| Senegal | -0.08 (-0.10, -0.05) | -0.08 (-0.10, -0.05) | 0.35 (0.22, 0.48) | 2.03 (1.91, 2.15) | -0.29 (-0.47, -0.12) | 2.30 (2.18, 2.43) |
| Serbia | 0.25 (0.14, 0.36) | 0.25 (0.14, 0.36) | -0.98 (-1.24, -0.72) | 0.34 (0.25, 0.43) | 2.89 (2.66, 3.13) | 2.06 (1.82, 2.31) |
| Seychelles | -0.18 (-0.28, -0.08) | -0.18 (-0.28, -0.08) | -0.84 (-0.95, -0.73) | 1.31 (1.07, 1.55) | 2.11 (1.90, 2.32) | 2.27 (1.87, 2.67) |
| Sierra Leone | 0.04 (-0.02, 0.10) | 0.04 (-0.02, 0.10) | 1.33 (1.05, 1.61) | 1.86 (1.80, 1.92) | -0.45 (-0.75, -0.15) | 1.94 (1.82, 2.06) |
| Singapore | 0.14 (0.06, 0.23) | 0.14 (0.06, 0.23) | -2.77 (-3.05, -2.50) | -0.92 (-1.14, -0.69) | 2.52 (2.01, 3.03) | 2.62 (2.33, 2.91) |
| Slovakia | -0.20 (-0.44, 0.03) | -0.20 (-0.44, 0.03) | -0.90 (-1.02, -0.78) | -0.33 (-0.48, -0.18) | 2.87 (2.72, 3.01) | 2.17 (2.06, 2.27) |
| Slovenia | 0.08 (-0.05, 0.21) | 0.08 (-0.05, 0.21) | -1.25 (-1.50, -0.99) | -1.05 (-1.29, -0.81) | 2.61 (2.22, 3.00) | 3.30 (2.82, 3.78) |
| Solomon Islands | 0.35 (0.33, 0.38) | 0.35 (0.33, 0.38) | 0.27 (0.13, 0.42) | 2.91 (2.82, 3.01) | 1.08 (0.97, 1.18) | 0.52 (0.48, 0.56) |
| Somalia | -0.08 (-0.12, -0.04) | -0.08 (-0.12, -0.04) | -0.34 (-0.43, -0.24) | 0.84 (0.80, 0.87) | 0.36 (0.28, 0.45) | -0.60 (-0.64, -0.57) |
| South Africa | -0.11 (-0.16, -0.05) | -0.11 (-0.16, -0.05) | 1.80 (1.35, 2.25) | 1.49 (1.37, 1.61) | 1.20 (0.98, 1.42) | 1.49 (1.40, 1.58) |
| South Sudan | 0.44 (0.40, 0.48) | 0.44 (0.40, 0.48) | 0.46 (0.11, 0.81) | 1.10 (0.91, 1.28) | 0.60 (0.42, 0.78) | -0.01 (-0.07, 0.04) |
| Spain | 0.06 (0.02, 0.10) | 0.06 (0.02, 0.10) | -1.09 (-1.25, -0.92) | -1.07 (-1.20, -0.94) | 0.64 (0.30, 0.97) | 0.72 (0.26, 1.20) |
| Sri Lanka | 0.33 (0.29, 0.36) | 0.33 (0.29, 0.36) | -0.33 (-0.47, -0.18) | 1.75 (1.57, 1.93) | 2.86 (2.72, 2.99) | 1.36 (1.24, 1.49) |
| Sudan | 0.35 (0.30, 0.41) | 0.35 (0.30, 0.41) | -1.08 (-1.17, -0.98) | 1.46 (1.28, 1.64) | 5.96 (5.79, 6.12) | 2.25 (2.16, 2.35) |
| Suriname | 0.19 (0.15, 0.24) | 0.19 (0.15, 0.24) | -0.53 (-0.77, -0.28) | 0.70 (0.57, 0.83) | 4.56 (3.61, 5.51) | 1.08 (0.84, 1.32) |
| Sweden | 0.19 (-0.02, 0.40) | 0.19 (-0.02, 0.40) | -0.81 (-0.99, -0.63) | -2.28 (-2.53, -2.02) | 0.95 (0.24, 1.67) | 0.07 (-0.44, 0.58) |
| Switzerland | 0.07 (0.03, 0.10) | 0.07 (0.03, 0.10) | -2.64 (-2.79, -2.48) | -1.35 (-1.83, -0.88) | -1.61 (-2.07, -1.14) | -0.46 (-0.76, -0.16) |
| Syrian Arab Republic | 0.51 (0.34, 0.67) | 0.51 (0.34, 0.67) | -0.90 (-1.18, -0.62) | 1.02 (0.88, 1.16) | 3.22 (2.75, 3.69) | 2.49 (2.26, 2.71) |
| Taiwan (Province of China) | 0.39 (0.35, 0.42) | 0.39 (0.35, 0.42) | -3.96 (-4.39, -3.53) | 1.41 (1.12, 1.69) | 2.43 (2.02, 2.85) | 3.26 (2.59, 3.93) |
| Tajikistan | 0.03 (0.01, 0.05) | 0.03 (0.01, 0.05) | -2.06 (-2.26, -1.85) | -0.11 (-0.18, -0.04) | 0.07 (-0.12, 0.26) | -0.52 (-0.77, -0.28) |
| Thailand | 0.29 (0.27, 0.32) | 0.29 (0.27, 0.32) | -1.35 (-1.63, -1.07) | 1.37 (1.20, 1.54) | 4.69 (4.54, 4.83) | 1.98 (1.83, 2.13) |
| Timor-Leste | 0.37 (0.34, 0.39) | 0.37 (0.34, 0.39) | -0.41 (-0.72, -0.09) | 2.54 (2.29, 2.78) | 1.57 (1.28, 1.86) | 1.52 (1.43, 1.61) |
| Togo | 0.12 (0.10, 0.14) | 0.12 (0.10, 0.14) | 0.45 (0.34, 0.56) | 1.65 (1.61, 1.69) | -1.01 (-1.27, -0.75) | 1.65 (1.56, 1.74) |
| Tokelau | 0.07 (0.01, 0.13) | 0.07 (0.01, 0.13) | -0.97 (-1.09, -0.85) | 1.55 (1.41, 1.69) | 2.04 (1.92, 2.17) | 1.07 (1.00, 1.14) |
| Tonga | 0.21 (0.17, 0.26) | 0.21 (0.17, 0.26) | -0.67 (-0.77, -0.56) | 1.48 (1.36, 1.60) | 1.43 (1.35, 1.52) | 0.56 (0.47, 0.66) |
| Trinidad and Tobago | 0.06 (0.03, 0.09) | 0.06 (0.03, 0.09) | -0.75 (-0.96, -0.55) | -0.01 (-0.17, 0.15) | 7.30 (5.82, 8.80) | 0.55 (0.34, 0.76) |
| Tunisia | 0.23 (0.22, 0.24) | 0.23 (0.22, 0.24) | -0.74 (-0.81, -0.66) | 1.09 (1.02, 1.17) | 3.35 (3.24, 3.45) | 2.08 (2.03, 2.13) |
| Turkey | 0.26 (0.20, 0.31) | 0.26 (0.20, 0.31) | -1.72 (-1.95, -1.50) | 0.20 (0.06, 0.33) | 4.72 (4.35, 5.09) | 2.48 (2.30, 2.67) |
| Turkmenistan | -0.13 (-0.16, -0.10) | -0.13 (-0.16, -0.10) | 0.72 (0.36, 1.09) | 3.48 (1.30, 5.71) | 2.93 (2.07, 3.79) | 1.98 (1.62, 2.35) |
| Tuvalu | -0.39 (-0.43, -0.35) | -0.39 (-0.43, -0.35) | -1.33 (-1.42, -1.25) | 1.64 (1.46, 1.83) | 2.05 (1.95, 2.15) | 1.66 (1.51, 1.82) |
| Uganda | 0.18 (0.17, 0.19) | 0.18 (0.17, 0.19) | -0.67 (-0.96, -0.38) | 1.40 (1.15, 1.65) | 1.31 (1.13, 1.49) | 0.31 (0.20, 0.41) |
| Ukraine | -0.00 (-0.02, 0.01) | -0.00 (-0.02, 0.01) | -3.35 (-3.74, -2.97) | 0.22 (-0.07, 0.50) | 1.26 (0.99, 1.54) | 1.10 (0.95, 1.24) |
| United Arab Emirates | -0.16 (-0.37, 0.05) | -0.16 (-0.37, 0.05) | -0.61 (-1.07, -0.15) | 2.10 (1.59, 2.61) | 3.23 (2.97, 3.49) | 3.75 (3.24, 4.26) |
| United Kingdom | -0.13 (-0.25, 0.00) | -0.13 (-0.25, 0.00) | -3.19 (-3.58, -2.80) | -1.51 (-1.68, -1.34) | -0.75 (-1.03, -0.48) | 1.31 (1.01, 1.62) |
| United Republic of Tanzania | 0.11 (0.06, 0.16) | 0.11 (0.06, 0.16) | -0.98 (-1.07, -0.89) | 0.96 (0.89, 1.04) | 1.25 (1.10, 1.40) | -0.10 (-0.19, -0.01) |
| United States Virgin Islands | -0.06 (-0.13, 0.01) | -0.06 (-0.13, 0.01) | -2.11 (-2.31, -1.92) | 0.65 (0.23, 1.07) | 7.95 (7.40, 8.50) | -1.10 (-1.56, -0.64) |
| United States of America | 0.96 (0.56, 1.35) | 0.96 (0.56, 1.35) | -1.55 (-1.78, -1.33) | -1.52 (-1.70, -1.33) | 1.20 (1.07, 1.32) | -0.80 (-0.92, -0.68) |
| Uruguay | 0.26 (0.22, 0.30) | 0.26 (0.22, 0.30) | -0.16 (-0.39, 0.07) | 0.04 (-0.06, 0.15) | 3.16 (2.91, 3.42) | 0.75 (0.35, 1.15) |
| Uzbekistan | 0.28 (0.26, 0.29) | 0.28 (0.26, 0.29) | -0.06 (-0.30, 0.18) | 1.18 (0.84, 1.51) | 2.98 (2.43, 3.54) | 1.31 (0.45, 2.18) |
| Vanuatu | 0.29 (0.28, 0.30) | 0.29 (0.28, 0.30) | -0.37 (-0.50, -0.24) | 2.08 (1.97, 2.19) | 0.58 (0.52, 0.65) | 0.55 (0.51, 0.60) |
| Venezuela (Bolivarian Republic of) | -0.07 (-0.12, -0.01) | -0.07 (-0.12, -0.01) | -0.16 (-0.45, 0.13) | 3.50 (2.34, 4.67) | 6.34 (5.38, 7.32) | 1.85 (1.36, 2.35) |
| Viet Nam | 0.26 (0.23, 0.30) | 0.26 (0.23, 0.30) | -0.24 (-0.34, -0.14) | 1.64 (1.54, 1.74) | 3.16 (2.99, 3.33) | 2.59 (2.47, 2.70) |
| Yemen | 0.07 (0.03, 0.10) | 0.07 (0.03, 0.10) | -0.85 (-0.93, -0.76) | 2.17 (2.00, 2.34) | 5.11 (4.65, 5.58) | 2.49 (2.34, 2.63) |
| Zambia | -0.06 (-0.10, -0.02) | -0.06 (-0.10, -0.02) | -1.06 (-1.28, -0.83) | 1.14 (0.99, 1.29) | 7.04 (5.86, 8.25) | 2.31 (1.93, 2.70) |
| Zimbabwe | -0.04 (-0.07, -0.01) | -0.04 (-0.07, -0.01) | 2.54 (1.66, 3.44) | 2.49 (1.98, 3.00) | 1.44 (0.97, 1.92) | 0.85 (0.52, 1.18) |

The location name is in alphabetical order. EAPC estimated annual percentage change, ASPR age-standardized prevalence rate, CI confidence interval.

**Table S7. EAPC of ASPR for 6 genital neoplasms in 204 countries and territories (1990-2021, 95% CI)**

| Location name | Uterine Fibroids | Uterine cancer | Cervical cancer | Ovarian cancer | Testicular cancer | Prostate cancer |
| --- | --- | --- | --- | --- | --- | --- |
| Afghanistan | 0.02 (-0.50, 0.54) | 1.35 (1.24, 1.46) | -0.85 (-1.01, -0.69) | 1.79 (1.63, 1.96) | 3.48 (3.17, 3.78) | 0.23 (0.19, 0.28) |
| Albania | -3.66 (-4.13, -3.19) | -0.45 (-0.67, -0.22) | -0.96 (-1.18, -0.74) | 0.65 (0.49, 0.82) | -0.33 (-0.49, -0.16) | 0.28 (0.16, 0.41) |
| Algeria | -0.04 (-0.34, 0.26) | 0.24 (0.13, 0.35) | -2.07 (-2.24, -1.91) | 0.77 (0.69, 0.85) | -0.70 (-0.95, -0.45) | 0.24 (0.00, 0.49) |
| American Samoa | -0.17 (-1.32, 0.99) | 1.10 (1.03, 1.18) | 0.19 (0.06, 0.32) | 1.73 (1.62, 1.83) | 3.83 (2.87, 4.81) | 0.72 (0.52, 0.92) |
| Andorra | -1.51 (-1.80, -1.23) | -0.51 (-0.70, -0.31) | -1.39 (-1.58, -1.20) | -0.75 (-0.93, -0.57) | -1.70 (-1.85, -1.55) | -0.81 (-1.00, -0.61) |
| Angola | -0.19 (-0.31, -0.07) | 0.38 (0.30, 0.46) | -0.71 (-0.82, -0.60) | 2.19 (2.08, 2.31) | 0.57 (0.43, 0.71) | 0.36 (0.30, 0.43) |
| Antigua and Barbuda | -2.10 (-2.66, -1.52) | 1.40 (1.04, 1.77) | -0.72 (-0.96, -0.49) | 1.10 (0.93, 1.27) | 5.00 (3.81, 6.20) | 0.34 (-0.08, 0.77) |
| Argentina | -4.41 (-4.97, -3.85) | -1.32 (-1.46, -1.18) | -0.32 (-0.53, -0.10) | -0.60 (-0.77, -0.43) | 0.23 (0.04, 0.42) | -0.61 (-0.95, -0.27) |
| Armenia | 0.36 (0.00, 0.73) | 0.17 (-0.40, 0.75) | -1.60 (-2.02, -1.18) | 0.98 (0.80, 1.15) | 1.07 (0.71, 1.42) | 1.90 (1.62, 2.18) |
| Australia | -6.39 (-9.48, -3.19) | 0.05 (-0.27, 0.37) | -3.17 (-3.39, -2.95) | -2.36 (-2.74, -1.98) | -2.46 (-2.68, -2.25) | -2.42 (-2.82, -2.02) |
| Austria | -3.40 (-3.99, -2.81) | -1.61 (-1.77, -1.45) | -3.22 (-3.46, -2.97) | -2.22 (-2.31, -2.13) | -2.32 (-2.51, -2.13) | -1.08 (-1.17, -0.99) |
| Azerbaijan | -1.70 (-1.89, -1.51) | -1.08 (-1.21, -0.94) | -1.91 (-2.08, -1.75) | 1.08 (0.73, 1.44) | 0.70 (0.49, 0.91) | 0.64 (0.37, 0.91) |
| Bahamas | -1.04 (-1.30, -0.79) | 1.25 (0.89, 1.61) | -1.04 (-1.17, -0.91) | 0.49 (0.39, 0.59) | 5.47 (4.32, 6.63) | 0.71 (0.50, 0.92) |
| Bahrain | -1.80 (-2.54, -1.05) | -0.55 (-0.87, -0.22) | -3.18 (-3.55, -2.81) | -0.22 (-0.37, -0.07) | -0.83 (-1.53, -0.12) | -0.58 (-0.88, -0.29) |
| Bangladesh | -1.61 (-1.97, -1.24) | -0.67 (-0.78, -0.57) | -2.02 (-2.17, -1.88) | 1.15 (1.08, 1.22) | -0.94 (-1.11, -0.77) | -0.78 (-0.97, -0.58) |
| Barbados | -1.25 (-1.37, -1.14) | 1.24 (0.72, 1.77) | -0.87 (-0.99, -0.74) | 0.32 (0.17, 0.47) | 2.98 (1.34, 4.65) | 0.33 (0.19, 0.46) |
| Belarus | -1.67 (-1.95, -1.39) | -0.37 (-1.11, 0.37) | -2.20 (-2.57, -1.83) | -0.02 (-0.57, 0.54) | 0.23 (-0.03, 0.48) | 1.33 (1.05, 1.62) |
| Belgium | -4.17 (-4.59, -3.75) | -0.52 (-0.67, -0.37) | -2.23 (-2.45, -2.00) | -2.13 (-2.26, -2.00) | -1.91 (-2.12, -1.70) | -2.07 (-2.24, -1.90) |
| Belize | -0.58 (-0.95, -0.21) | 0.65 (0.26, 1.04) | -0.33 (-0.74, 0.08) | 1.24 (0.86, 1.62) | 6.22 (4.57, 7.90) | 1.18 (0.33, 2.04) |
| Benin | 0.74 (0.24, 1.24) | 0.72 (0.62, 0.81) | -0.40 (-0.50, -0.30) | 1.21 (1.14, 1.29) | -1.99 (-2.21, -1.76) | 1.28 (1.19, 1.36) |
| Bermuda | -6.27 (-7.36, -5.17) | -1.40 (-1.74, -1.06) | -3.41 (-3.74, -3.07) | -1.45 (-1.69, -1.22) | 3.82 (2.85, 4.80) | -0.50 (-0.65, -0.36) |
| Bhutan | -1.29 (-1.44, -1.14) | -0.46 (-0.61, -0.31) | -2.49 (-2.76, -2.22) | 1.18 (1.13, 1.23) | -0.16 (-0.26, -0.07) | 0.46 (0.41, 0.52) |
| Bolivia (Plurinational State of) | -2.34 (-2.56, -2.13) | -0.47 (-0.54, -0.39) | -1.78 (-1.89, -1.67) | 1.98 (1.82, 2.13) | 1.61 (1.36, 1.86) | 0.29 (0.22, 0.36) |
| Bosnia and Herzegovina | -6.15 (-6.86, -5.43) | 0.24 (0.12, 0.36) | -1.03 (-1.18, -0.87) | 0.98 (0.85, 1.10) | -0.70 (-0.96, -0.45) | 1.23 (1.08, 1.38) |
| Botswana | -1.09 (-1.52, -0.67) | 1.12 (0.70, 1.53) | -0.31 (-0.84, 0.21) | 1.54 (1.33, 1.76) | -0.02 (-0.13, 0.09) | -0.14 (-0.30, 0.03) |
| Brazil | 1.72 (1.53, 1.90) | -0.70 (-0.83, -0.58) | -1.77 (-1.89, -1.66) | 0.05 (-0.07, 0.18) | 1.09 (0.87, 1.30) | -0.26 (-0.60, 0.09) |
| Brunei Darussalam | -0.46 (-0.75, -0.16) | 0.46 (0.26, 0.67) | -1.35 (-1.60, -1.10) | 0.53 (0.42, 0.64) | -0.61 (-0.76, -0.47) | 0.44 (0.22, 0.66) |
| Bulgaria | -6.93 (-7.51, -6.35) | 1.35 (1.00, 1.71) | -0.13 (-0.35, 0.08) | 1.04 (0.72, 1.35) | 0.01 (-0.36, 0.39) | 0.81 (0.65, 0.97) |
| Burkina Faso | -1.17 (-1.32, -1.02) | 0.51 (0.42, 0.61) | -0.64 (-0.72, -0.56) | 1.16 (1.07, 1.24) | -1.56 (-1.80, -1.32) | 1.81 (1.69, 1.92) |
| Burundi | -0.57 (-0.66, -0.49) | -1.60 (-1.77, -1.43) | -2.78 (-3.05, -2.51) | -0.45 (-0.57, -0.34) | 0.40 (0.24, 0.57) | -0.03 (-0.12, 0.06) |
| Cabo Verde | 7.24 (3.85, 10.75) | 0.56 (0.42, 0.71) | -1.21 (-1.41, -1.01) | 4.65 (3.78, 5.52) | -0.03 (-0.15, 0.09) | 1.77 (1.34, 2.21) |
| Cambodia | -0.85 (-0.95, -0.75) | -0.03 (-0.10, 0.04) | -1.69 (-1.79, -1.60) | 2.44 (2.40, 2.49) | 1.01 (0.95, 1.06) | 0.95 (0.87, 1.03) |
| Cameroon | 0.51 (0.01, 1.02) | 0.35 (0.30, 0.40) | -0.40 (-0.55, -0.25) | 1.21 (1.13, 1.28) | -1.72 (-1.90, -1.55) | 1.50 (1.42, 1.59) |
| Canada | -0.40 (-0.66, -0.15) | 0.01 (-0.27, 0.29) | -0.89 (-1.09, -0.69) | -0.69 (-0.91, -0.47) | -0.30 (-0.61, 0.02) | -2.83 (-3.07, -2.58) |
| Central African Republic | -0.42 (-0.48, -0.35) | 0.06 (-0.00, 0.13) | -0.76 (-0.91, -0.62) | 0.75 (0.69, 0.81) | 0.17 (0.12, 0.23) | 0.11 (0.07, 0.16) |
| Chad | 1.10 (0.61, 1.59) | 0.82 (0.72, 0.92) | 0.28 (0.14, 0.42) | 1.07 (1.02, 1.12) | -0.84 (-1.06, -0.62) | 2.70 (2.53, 2.87) |
| Chile | -3.87 (-4.91, -2.82) | -0.73 (-0.97, -0.50) | -3.35 (-3.52, -3.19) | -0.08 (-0.41, 0.26) | 0.05 (-0.30, 0.40) | -0.18 (-0.52, 0.17) |
| China | 5.08 (3.96, 6.21) | -2.55 (-2.90, -2.20) | -1.02 (-1.18, -0.86) | -0.96 (-1.16, -0.77) | -1.88 (-2.23, -1.53) | -0.11 (-0.33, 0.11) |
| Colombia | -2.27 (-2.71, -1.82) | -0.32 (-0.73, 0.10) | -2.43 (-2.67, -2.20) | 0.46 (0.31, 0.61) | 0.97 (0.72, 1.22) | -1.71 (-1.99, -1.43) |
| Comoros | -1.11 (-1.27, -0.95) | -0.12 (-0.21, -0.03) | -1.37 (-1.52, -1.21) | 1.18 (1.10, 1.27) | 0.50 (0.08, 0.93) | 0.15 (0.09, 0.20) |
| Congo | -0.76 (-0.94, -0.59) | -0.23 (-0.36, -0.10) | -1.43 (-1.65, -1.21) | 0.99 (0.91, 1.07) | 0.70 (0.62, 0.78) | 0.50 (0.38, 0.62) |
| Cook Islands | -2.28 (-2.38, -2.17) | -0.27 (-0.43, -0.11) | -1.34 (-1.59, -1.10) | 1.22 (1.10, 1.33) | 0.08 (0.03, 0.12) | -0.57 (-0.66, -0.48) |
| Costa Rica | -2.59 (-3.26, -1.91) | 0.78 (0.37, 1.19) | -2.41 (-2.72, -2.11) | 1.36 (1.05, 1.67) | 1.68 (1.43, 1.94) | 0.42 (-0.03, 0.87) |
| Croatia | -7.29 (-8.26, -6.32) | -0.29 (-0.68, 0.11) | -2.31 (-2.60, -2.01) | -0.41 (-0.61, -0.20) | -1.07 (-1.41, -0.73) | 0.01 (-0.25, 0.27) |
| Cuba | -2.20 (-2.54, -1.87) | 0.91 (0.62, 1.21) | -1.14 (-1.29, -0.99) | 0.88 (0.65, 1.11) | 4.53 (3.39, 5.67) | 0.50 (0.41, 0.60) |
| Cyprus | -3.70 (-4.05, -3.35) | -1.18 (-1.34, -1.01) | -1.96 (-2.18, -1.74) | -0.56 (-0.75, -0.37) | -2.79 (-2.95, -2.63) | -2.27 (-2.50, -2.04) |
| Czechia | -6.76 (-7.66, -5.85) | -1.58 (-1.67, -1.49) | -2.89 (-2.99, -2.78) | -0.49 (-0.82, -0.16) | -0.97 (-1.38, -0.55) | -0.36 (-0.65, -0.06) |
| Côte d'Ivoire | 1.42 (0.92, 1.93) | 0.69 (0.53, 0.86) | -0.12 (-0.32, 0.07) | 1.11 (1.04, 1.18) | -0.02 (-0.21, 0.17) | 0.09 (0.03, 0.15) |
| Democratic People's Republic of Korea | 2.06 (1.62, 2.51) | -0.17 (-0.33, -0.01) | -0.16 (-0.31, -0.01) | 0.58 (0.51, 0.65) | -0.59 (-0.70, -0.48) | 0.48 (0.35, 0.60) |
| Democratic Republic of the Congo | 0.25 (0.15, 0.35) | 0.53 (0.49, 0.56) | -0.18 (-0.28, -0.09) | 1.40 (1.21, 1.59) | 0.50 (0.28, 0.72) | -0.28 (-0.57, 0.02) |
| Denmark | -4.42 (-4.83, -4.00) | -1.55 (-1.68, -1.42) | -3.54 (-3.89, -3.18) | -1.57 (-2.09, -1.05) | -2.95 (-3.13, -2.76) | -0.38 (-0.57, -0.20) |
| Djibouti | -0.33 (-0.48, -0.17) | -0.03 (-0.09, 0.04) | -0.86 (-1.02, -0.70) | 0.60 (0.54, 0.65) | 0.57 (0.45, 0.68) | 0.59 (0.52, 0.66) |
| Dominica | -1.31 (-1.45, -1.18) | 0.36 (0.19, 0.52) | -1.17 (-1.24, -1.10) | -0.23 (-0.35, -0.11) | 4.68 (3.98, 5.38) | 0.15 (-0.10, 0.40) |
| Dominican Republic | 0.03 (-0.26, 0.31) | 0.81 (0.65, 0.98) | -0.27 (-0.40, -0.14) | 1.18 (1.05, 1.30) | 0.54 (-0.08, 1.17) | -0.00 (-0.36, 0.36) |
| Ecuador | -2.91 (-3.66, -2.15) | -1.33 (-2.04, -0.61) | -1.30 (-1.54, -1.05) | 6.43 (4.58, 8.31) | 5.08 (2.97, 7.22) | -0.07 (-0.50, 0.35) |
| Egypt | -1.14 (-1.37, -0.92) | 0.25 (0.12, 0.38) | 1.89 (1.37, 2.41) | 3.29 (2.69, 3.90) | 1.80 (1.55, 2.05) | 2.98 (2.61, 3.36) |
| El Salvador | -2.41 (-2.65, -2.16) | 0.18 (0.01, 0.35) | -0.82 (-1.10, -0.53) | 2.30 (2.08, 2.52) | 1.56 (1.46, 1.65) | 0.22 (-0.03, 0.48) |
| Equatorial Guinea | -2.37 (-2.51, -2.23) | 0.53 (0.42, 0.64) | -1.65 (-1.82, -1.47) | 2.35 (2.20, 2.50) | 1.39 (1.30, 1.49) | 0.98 (0.85, 1.12) |
| Eritrea | -0.74 (-0.88, -0.59) | 0.37 (0.32, 0.42) | -0.75 (-0.81, -0.68) | 1.28 (1.16, 1.41) | 1.02 (0.95, 1.08) | 0.35 (0.25, 0.45) |
| Estonia | -4.79 (-5.12, -4.45) | -1.21 (-1.38, -1.03) | -2.74 (-2.88, -2.60) | -0.99 (-1.84, -0.14) | -2.52 (-2.80, -2.24) | 1.91 (1.21, 2.60) |
| Eswatini | 0.29 (-0.13, 0.71) | 1.45 (0.95, 1.95) | 1.85 (0.98, 2.74) | 1.34 (1.20, 1.48) | 0.49 (0.33, 0.65) | 0.59 (0.28, 0.90) |
| Ethiopia | -2.12 (-2.50, -1.74) | -1.40 (-1.62, -1.18) | -3.46 (-3.73, -3.19) | 1.03 (0.85, 1.21) | 0.55 (0.46, 0.64) | 0.09 (0.05, 0.13) |
| Fiji | 0.94 (0.58, 1.30) | 0.92 (0.77, 1.06) | -0.52 (-0.69, -0.35) | 0.50 (0.37, 0.64) | 0.92 (0.32, 1.52) | -0.03 (-0.24, 0.18) |
| Finland | -2.93 (-3.45, -2.40) | -0.62 (-0.72, -0.52) | -2.64 (-2.95, -2.32) | -1.57 (-1.71, -1.42) | -1.82 (-2.03, -1.61) | -0.99 (-1.16, -0.82) |
| France | -4.44 (-4.71, -4.16) | -0.45 (-0.62, -0.29) | -1.96 (-2.11, -1.82) | -1.26 (-1.35, -1.17) | -1.55 (-1.75, -1.35) | -2.18 (-2.38, -1.97) |
| Gabon | -0.63 (-0.77, -0.49) | 0.01 (-0.23, 0.24) | -1.06 (-1.33, -0.78) | 0.86 (0.79, 0.93) | 0.24 (0.13, 0.35) | 0.28 (0.24, 0.32) |
| Gambia | 1.73 (1.17, 2.29) | 1.00 (0.85, 1.15) | 0.27 (0.08, 0.47) | 1.57 (1.38, 1.77) | -0.22 (-0.54, 0.10) | 0.62 (0.52, 0.73) |
| Georgia | 2.83 (2.28, 3.39) | -0.08 (-0.57, 0.41) | -0.17 (-0.82, 0.49) | 6.16 (5.72, 6.61) | 1.18 (0.52, 1.84) | 4.46 (3.64, 5.30) |
| Germany | -4.15 (-4.89, -3.40) | -1.72 (-2.02, -1.43) | -3.03 (-3.47, -2.60) | -2.14 (-2.25, -2.03) | -2.21 (-2.56, -1.87) | -0.80 (-1.04, -0.56) |
| Ghana | -0.60 (-0.65, -0.54) | 1.39 (1.33, 1.46) | 0.05 (-0.01, 0.11) | 2.23 (2.19, 2.28) | -1.45 (-1.62, -1.28) | -0.43 (-0.59, -0.26) |
| Greece | -2.98 (-3.91, -2.04) | 0.45 (0.21, 0.68) | -1.69 (-1.92, -1.47) | -0.56 (-0.79, -0.32) | -0.84 (-0.99, -0.69) | -1.33 (-1.67, -0.99) |
| Greenland | -1.84 (-1.98, -1.69) | -2.05 (-2.18, -1.91) | -3.43 (-3.64, -3.21) | -2.09 (-2.38, -1.81) | -3.26 (-3.81, -2.70) | -0.21 (-0.33, -0.10) |
| Grenada | -1.18 (-1.73, -0.63) | 0.92 (0.71, 1.14) | -0.76 (-1.08, -0.43) | 1.40 (1.23, 1.57) | 5.84 (4.57, 7.11) | 0.18 (-1.06, 1.43) |
| Guam | -6.36 (-7.43, -5.29) | -0.35 (-0.82, 0.13) | -1.73 (-2.14, -1.31) | 1.71 (1.24, 2.19) | 3.09 (2.45, 3.73) | -0.67 (-0.96, -0.38) |
| Guatemala | -3.03 (-3.99, -2.06) | -0.81 (-1.08, -0.54) | -0.13 (-0.72, 0.46) | 2.99 (2.58, 3.40) | 1.81 (1.41, 2.21) | 0.56 (-0.21, 1.33) |
| Guinea | 1.19 (0.68, 1.70) | 0.32 (0.22, 0.43) | -0.48 (-0.58, -0.39) | 0.91 (0.85, 0.98) | 0.46 (0.39, 0.54) | 0.91 (0.89, 0.94) |
| Guinea-Bissau | 0.93 (0.44, 1.42) | 1.04 (0.95, 1.13) | 0.29 (0.19, 0.38) | 1.70 (1.62, 1.77) | -1.42 (-1.59, -1.26) | 1.43 (1.34, 1.52) |
| Guyana | -0.05 (-0.29, 0.18) | 1.11 (0.72, 1.50) | -0.88 (-1.13, -0.64) | 1.57 (1.18, 1.95) | 5.70 (4.32, 7.09) | 0.45 (0.14, 0.76) |
| Haiti | -1.15 (-1.22, -1.08) | 0.15 (0.08, 0.23) | -1.31 (-1.38, -1.24) | 0.97 (0.89, 1.04) | 2.24 (2.03, 2.46) | 0.87 (0.74, 1.00) |
| Honduras | -0.86 (-0.92, -0.79) | 1.60 (1.38, 1.81) | 0.41 (0.17, 0.65) | 1.59 (1.45, 1.73) | 0.16 (0.09, 0.24) | 1.33 (1.19, 1.47) |
| Hungary | -7.22 (-8.08, -6.36) | -1.53 (-1.90, -1.15) | -2.00 (-2.13, -1.86) | -0.49 (-0.75, -0.23) | -1.41 (-1.68, -1.15) | -1.12 (-1.35, -0.89) |
| Iceland | -3.31 (-3.96, -2.66) | -0.24 (-0.38, -0.10) | -2.52 (-2.89, -2.15) | -1.74 (-1.95, -1.53) | -1.87 (-2.11, -1.62) | -1.01 (-1.18, -0.84) |
| India | -0.87 (-1.11, -0.62) | 0.19 (-0.01, 0.40) | -1.89 (-2.23, -1.55) | 1.47 (1.36, 1.58) | -0.76 (-0.96, -0.56) | 0.05 (-0.14, 0.24) |
| Indonesia | -2.02 (-2.22, -1.83) | 0.23 (0.11, 0.36) | -0.89 (-1.06, -0.73) | 0.89 (0.78, 1.01) | 0.93 (0.86, 1.01) | 1.39 (1.31, 1.47) |
| Iran (Islamic Republic of) | -1.99 (-2.13, -1.85) | 0.84 (0.42, 1.25) | -1.98 (-2.11, -1.84) | 2.06 (1.88, 2.25) | 4.38 (3.44, 5.32) | 1.06 (0.93, 1.20) |
| Iraq | -1.23 (-1.55, -0.92) | 0.94 (0.78, 1.10) | -0.96 (-1.04, -0.88) | 1.26 (1.15, 1.37) | 0.37 (0.30, 0.45) | 0.87 (0.66, 1.09) |
| Ireland | -5.22 (-5.83, -4.62) | 0.13 (-0.32, 0.58) | -2.79 (-3.12, -2.47) | -1.45 (-1.61, -1.28) | -1.96 (-2.15, -1.77) | -1.77 (-2.05, -1.49) |
| Israel | -4.72 (-5.17, -4.27) | 0.20 (-0.03, 0.43) | -1.77 (-1.90, -1.63) | -1.59 (-1.76, -1.42) | -1.81 (-2.11, -1.51) | -2.55 (-2.91, -2.19) |
| Italy | -3.48 (-4.09, -2.86) | 3.03 (2.31, 3.75) | 1.86 (1.14, 2.58) | -0.61 (-0.74, -0.47) | 0.01 (-0.35, 0.36) | -1.13 (-1.31, -0.94) |
| Jamaica | 0.00 (-0.30, 0.30) | 2.01 (1.59, 2.43) | -1.12 (-1.43, -0.80) | 0.50 (0.32, 0.68) | 4.74 (3.39, 6.11) | 1.65 (0.93, 2.37) |
| Japan | -0.23 (-0.60, 0.14) | 0.37 (0.20, 0.55) | -1.00 (-1.13, -0.88) | -0.67 (-0.75, -0.58) | -2.06 (-2.37, -1.75) | 0.15 (-0.08, 0.37) |
| Jordan | -2.88 (-3.41, -2.35) | -1.05 (-1.44, -0.66) | -3.62 (-4.13, -3.10) | 0.40 (0.08, 0.73) | 1.19 (0.82, 1.56) | 0.28 (0.15, 0.41) |
| Kazakhstan | 0.83 (0.48, 1.19) | -1.61 (-2.19, -1.02) | -1.82 (-2.37, -1.26) | 0.00 (-0.29, 0.30) | 0.15 (-0.07, 0.37) | 0.87 (0.56, 1.18) |
| Kenya | -0.48 (-0.61, -0.35) | 1.56 (1.38, 1.74) | 0.35 (0.15, 0.54) | 1.86 (1.78, 1.95) | 1.01 (0.94, 1.09) | 1.38 (1.21, 1.55) |
| Kiribati | -0.76 (-0.96, -0.55) | 0.67 (0.64, 0.71) | -0.09 (-0.14, -0.03) | 1.71 (1.54, 1.89) | 0.84 (0.76, 0.93) | 0.28 (0.21, 0.34) |
| Kuwait | -3.40 (-4.85, -1.93) | 2.78 (2.19, 3.37) | -3.59 (-4.23, -2.94) | -0.75 (-1.12, -0.38) | -1.00 (-3.06, 1.10) | 2.11 (1.34, 2.90) |
| Kyrgyzstan | 1.88 (1.23, 2.53) | -0.91 (-1.25, -0.56) | -1.28 (-1.51, -1.06) | 3.13 (2.35, 3.91) | -0.70 (-1.03, -0.37) | 0.04 (-0.32, 0.40) |
| Lao People's Democratic Republic | -2.05 (-2.24, -1.85) | -0.68 (-0.76, -0.61) | -2.50 (-2.58, -2.42) | 1.90 (1.82, 1.98) | 0.54 (0.52, 0.56) | 0.74 (0.67, 0.81) |
| Latvia | -3.90 (-4.22, -3.58) | 0.75 (0.48, 1.01) | -1.91 (-2.12, -1.70) | 0.65 (0.23, 1.07) | -0.12 (-0.46, 0.21) | 2.48 (2.18, 2.77) |
| Lebanon | -2.56 (-2.69, -2.44) | -0.79 (-0.88, -0.70) | -3.09 (-3.16, -3.01) | 0.85 (0.65, 1.06) | 1.83 (1.66, 1.99) | 1.46 (1.07, 1.86) |
| Lesotho | 1.16 (0.79, 1.53) | 3.14 (2.58, 3.70) | 3.66 (2.86, 4.47) | 2.16 (1.92, 2.40) | 1.60 (1.51, 1.68) | 1.21 (1.10, 1.31) |
| Liberia | 1.05 (0.59, 1.51) | 1.13 (0.94, 1.32) | 0.19 (0.05, 0.32) | 1.94 (1.83, 2.05) | -1.42 (-1.57, -1.26) | 1.43 (1.34, 1.53) |
| Libya | 2.71 (2.30, 3.12) | 1.28 (1.11, 1.45) | 0.11 (-0.02, 0.24) | 1.64 (1.47, 1.81) | 0.18 (0.05, 0.31) | 0.46 (0.37, 0.55) |
| Lithuania | -4.00 (-4.50, -3.50) | 0.41 (0.18, 0.64) | -1.56 (-1.78, -1.34) | -0.54 (-1.00, -0.07) | 0.59 (0.18, 1.01) | 2.03 (1.55, 2.52) |
| Luxembourg | -5.56 (-6.01, -5.10) | -0.87 (-1.13, -0.61) | -2.78 (-3.01, -2.55) | -1.67 (-1.84, -1.50) | -3.58 (-3.75, -3.42) | -1.67 (-1.79, -1.56) |
| Madagascar | -0.59 (-0.62, -0.55) | -0.13 (-0.23, -0.03) | -0.91 (-0.99, -0.83) | 0.52 (0.34, 0.69) | 0.07 (-0.06, 0.20) | -0.76 (-0.93, -0.59) |
| Malawi | -0.00 (-0.07, 0.07) | 0.33 (0.22, 0.44) | -0.22 (-0.55, 0.12) | 1.51 (1.44, 1.58) | 1.05 (1.01, 1.10) | 0.57 (0.47, 0.67) |
| Malaysia | -1.36 (-1.50, -1.21) | -0.05 (-0.14, 0.05) | -1.31 (-1.61, -1.01) | 1.13 (0.76, 1.49) | 0.01 (-0.13, 0.16) | 0.50 (0.31, 0.69) |
| Maldives | -2.50 (-2.61, -2.40) | -2.45 (-2.62, -2.27) | -5.02 (-5.20, -4.83) | 0.32 (-0.01, 0.65) | -0.25 (-0.40, -0.09) | -1.40 (-1.52, -1.28) |
| Mali | 0.55 (0.09, 1.02) | -0.10 (-0.17, -0.03) | -1.22 (-1.29, -1.14) | 0.66 (0.62, 0.71) | 0.25 (0.10, 0.39) | 0.84 (0.78, 0.91) |
| Malta | -4.95 (-5.42, -4.48) | -0.48 (-0.65, -0.30) | -2.37 (-2.83, -1.92) | -1.27 (-1.48, -1.07) | -1.45 (-1.64, -1.26) | -1.91 (-2.09, -1.72) |
| Marshall Islands | -1.08 (-1.31, -0.84) | 0.70 (0.55, 0.85) | -0.52 (-0.69, -0.35) | 1.57 (1.49, 1.66) | 1.22 (1.12, 1.32) | 1.74 (1.60, 1.87) |
| Mauritania | 0.55 (0.07, 1.04) | -0.04 (-0.16, 0.07) | -0.86 (-0.98, -0.75) | 1.08 (1.00, 1.16) | -1.92 (-2.08, -1.76) | 2.34 (2.23, 2.44) |
| Mauritius | -4.82 (-6.49, -3.12) | -1.42 (-2.10, -0.73) | -2.58 (-3.08, -2.08) | 1.15 (0.75, 1.56) | 2.33 (1.34, 3.33) | 0.56 (0.27, 0.85) |
| Mexico | -1.63 (-2.20, -1.05) | 0.79 (0.21, 1.37) | -3.84 (-4.00, -3.68) | 1.01 (0.96, 1.06) | 1.61 (1.35, 1.88) | -0.69 (-0.84, -0.54) |
| Micronesia (Federated States of) | -1.61 (-1.76, -1.46) | 0.55 (0.48, 0.62) | -0.76 (-0.84, -0.67) | 1.72 (1.61, 1.83) | 0.30 (0.25, 0.36) | 0.40 (0.35, 0.46) |
| Monaco | -2.08 (-2.23, -1.93) | 0.41 (0.27, 0.55) | -1.06 (-1.13, -0.98) | -0.72 (-0.77, -0.67) | -0.81 (-0.88, -0.73) | 0.29 (0.23, 0.36) |
| Mongolia | 0.64 (0.43, 0.85) | -0.64 (-0.82, -0.47) | -1.30 (-1.52, -1.09) | 0.89 (0.77, 1.00) | 0.25 (0.03, 0.46) | 1.35 (1.26, 1.45) |
| Montenegro | -1.31 (-1.56, -1.06) | 0.49 (0.34, 0.65) | -0.54 (-0.88, -0.20) | 0.31 (0.08, 0.55) | 0.59 (0.34, 0.83) | 1.02 (0.62, 1.41) |
| Morocco | 0.12 (-0.14, 0.38) | 0.91 (0.85, 0.97) | -0.54 (-0.62, -0.45) | 1.43 (1.38, 1.48) | -0.20 (-0.33, -0.07) | 0.57 (0.40, 0.73) |
| Mozambique | -0.43 (-0.48, -0.37) | 0.93 (0.76, 1.10) | 0.53 (0.34, 0.73) | 1.35 (1.26, 1.45) | 1.38 (1.28, 1.49) | 0.27 (0.23, 0.32) |
| Myanmar | -1.33 (-1.54, -1.12) | -0.78 (-0.93, -0.64) | -2.67 (-2.87, -2.48) | 0.86 (0.79, 0.92) | 0.06 (0.00, 0.12) | 0.37 (0.32, 0.43) |
| Namibia | -0.27 (-0.51, -0.02) | 0.40 (0.20, 0.61) | 0.91 (0.62, 1.20) | 0.90 (0.75, 1.05) | 0.04 (-0.11, 0.18) | 2.01 (1.77, 2.24) |
| Nauru | -0.60 (-1.00, -0.19) | 1.24 (1.10, 1.39) | 0.18 (-0.14, 0.51) | 2.15 (2.05, 2.25) | -0.50 (-0.52, -0.48) | -0.65 (-0.68, -0.62) |
| Nepal | -1.14 (-1.36, -0.92) | -0.12 (-0.50, 0.26) | -1.74 (-2.22, -1.25) | 1.47 (1.37, 1.56) | -0.78 (-0.97, -0.60) | 0.09 (-0.04, 0.22) |
| Netherlands | -3.49 (-3.83, -3.15) | -0.62 (-0.73, -0.52) | -2.21 (-2.34, -2.07) | -1.75 (-1.87, -1.64) | -1.74 (-1.89, -1.58) | -1.31 (-1.46, -1.16) |
| New Zealand | -3.33 (-6.56, 0.00) | 0.11 (-0.08, 0.31) | -4.04 (-4.44, -3.64) | -2.21 (-2.41, -2.00) | -2.31 (-2.79, -1.84) | -1.37 (-1.58, -1.16) |
| Nicaragua | -2.22 (-2.53, -1.91) | 0.73 (0.57, 0.90) | -1.75 (-1.91, -1.60) | 2.02 (1.70, 2.33) | 1.87 (1.63, 2.10) | 0.05 (-0.32, 0.42) |
| Niger | 0.65 (0.18, 1.12) | 0.63 (0.54, 0.73) | -0.06 (-0.13, -0.00) | 1.38 (1.33, 1.43) | -1.99 (-2.22, -1.76) | 2.01 (1.83, 2.19) |
| Nigeria | 1.47 (0.96, 1.98) | 0.82 (0.63, 1.00) | -0.18 (-0.26, -0.10) | 2.01 (1.75, 2.27) | 0.54 (0.39, 0.68) | 1.07 (0.95, 1.19) |
| Niue | -1.59 (-1.92, -1.27) | 0.32 (0.24, 0.39) | -1.17 (-1.27, -1.08) | 1.10 (1.06, 1.14) | 0.52 (0.41, 0.64) | 0.94 (0.80, 1.09) |
| North Macedonia | -1.47 (-1.65, -1.29) | 0.30 (0.03, 0.58) | -1.25 (-1.64, -0.87) | 0.58 (0.32, 0.83) | -0.59 (-0.74, -0.43) | 0.47 (0.10, 0.84) |
| Northern Mariana Islands | -0.34 (-0.95, 0.27) | 1.70 (1.43, 1.97) | -0.72 (-0.94, -0.50) | 3.05 (2.59, 3.50) | 1.78 (0.74, 2.83) | 0.83 (0.56, 1.10) |
| Norway | -4.81 (-6.90, -2.68) | -1.23 (-1.43, -1.03) | -2.27 (-2.66, -1.87) | -1.44 (-1.64, -1.23) | -2.53 (-3.20, -1.86) | -1.22 (-1.38, -1.06) |
| Oman | -1.69 (-1.91, -1.48) | 0.17 (-0.03, 0.37) | -2.65 (-2.79, -2.51) | 0.59 (0.27, 0.91) | 0.05 (-0.29, 0.38) | 0.42 (0.08, 0.75) |
| Pakistan | -0.47 (-0.61, -0.33) | 0.96 (0.75, 1.17) | -0.45 (-0.70, -0.20) | 1.50 (1.33, 1.67) | 0.19 (0.06, 0.32) | 0.45 (0.25, 0.65) |
| Palau | -2.64 (-2.78, -2.50) | 0.09 (-0.03, 0.21) | -0.96 (-1.14, -0.78) | 0.51 (0.44, 0.58) | 0.22 (0.10, 0.33) | -0.17 (-0.24, -0.10) |
| Palestine | -3.45 (-3.87, -3.02) | 0.01 (-0.12, 0.13) | -1.93 (-2.13, -1.73) | 1.17 (1.07, 1.27) | -0.23 (-0.51, 0.06) | -0.64 (-0.82, -0.45) |
| Panama | -2.96 (-3.58, -2.34) | 1.36 (1.08, 1.64) | -2.57 (-2.74, -2.41) | 2.37 (1.95, 2.79) | 2.24 (1.87, 2.61) | -0.10 (-0.64, 0.44) |
| Papua New Guinea | -0.52 (-0.71, -0.32) | 0.23 (0.19, 0.27) | -0.90 (-0.95, -0.85) | 0.94 (0.87, 1.02) | 1.00 (0.94, 1.07) | 1.05 (1.00, 1.11) |
| Paraguay | 0.30 (0.12, 0.47) | -0.02 (-0.12, 0.09) | -0.48 (-0.70, -0.26) | 1.47 (1.23, 1.71) | 2.00 (1.74, 2.26) | 1.49 (1.11, 1.87) |
| Peru | -2.82 (-3.44, -2.19) | -1.15 (-1.42, -0.88) | -1.51 (-1.80, -1.21) | 0.68 (0.52, 0.83) | -0.70 (-0.92, -0.49) | -0.26 (-0.40, -0.13) |
| Philippines | -1.47 (-1.56, -1.38) | 0.73 (0.65, 0.81) | 0.20 (0.12, 0.28) | 1.28 (1.24, 1.32) | -0.24 (-0.31, -0.18) | -0.02 (-0.12, 0.08) |
| Poland | -8.69 (-10.51, -6.84) | 0.67 (0.42, 0.92) | -2.84 (-3.05, -2.64) | -0.08 (-0.25, 0.10) | -0.53 (-0.83, -0.23) | 1.10 (0.77, 1.43) |
| Portugal | -3.75 (-4.28, -3.22) | -0.87 (-1.03, -0.70) | -2.63 (-2.75, -2.50) | -1.16 (-1.34, -0.97) | -2.54 (-2.77, -2.31) | -1.78 (-2.04, -1.53) |
| Puerto Rico | -2.07 (-3.30, -0.83) | 0.51 (0.24, 0.78) | -1.55 (-1.73, -1.37) | 1.52 (0.90, 2.14) | 4.39 (3.34, 5.44) | -2.34 (-2.55, -2.13) |
| Qatar | -3.71 (-4.12, -3.30) | 0.35 (-0.20, 0.90) | -2.28 (-3.11, -1.44) | 0.58 (0.23, 0.93) | 4.78 (3.72, 5.85) | -1.12 (-1.54, -0.69) |
| Republic of Korea | -3.65 (-3.97, -3.33) | -3.47 (-3.93, -3.01) | -4.02 (-4.25, -3.79) | 0.29 (0.04, 0.54) | -3.18 (-3.65, -2.71) | 1.30 (0.98, 1.62) |
| Republic of Moldova | -2.78 (-3.06, -2.49) | -0.53 (-0.79, -0.26) | -1.49 (-1.73, -1.24) | -0.99 (-1.39, -0.59) | -0.88 (-1.14, -0.62) | 2.18 (1.55, 2.81) |
| Romania | -7.72 (-8.27, -7.17) | -0.29 (-0.54, -0.04) | -0.99 (-1.24, -0.75) | 0.70 (0.58, 0.83) | -0.62 (-0.80, -0.45) | 1.09 (0.94, 1.23) |
| Russian Federation | -2.11 (-2.32, -1.89) | -0.60 (-0.86, -0.33) | -0.63 (-0.75, -0.51) | -0.39 (-0.58, -0.20) | -1.49 (-1.97, -0.99) | 2.86 (2.71, 3.02) |
| Rwanda | -1.54 (-1.75, -1.33) | -1.51 (-1.78, -1.24) | -3.55 (-3.98, -3.13) | 0.89 (0.82, 0.95) | 0.28 (0.10, 0.47) | -0.83 (-0.99, -0.67) |
| Saint Kitts and Nevis | -3.36 (-3.64, -3.08) | 0.35 (0.01, 0.69) | -2.28 (-2.53, -2.03) | 0.25 (0.08, 0.41) | 4.39 (3.31, 5.47) | 0.89 (0.64, 1.14) |
| Saint Lucia | -2.25 (-2.58, -1.91) | -1.03 (-1.34, -0.71) | -2.84 (-3.13, -2.56) | -0.47 (-0.67, -0.27) | 4.93 (3.75, 6.13) | -0.26 (-0.59, 0.06) |
| Saint Vincent and the Grenadines | -0.19 (-0.79, 0.41) | -0.30 (-0.48, -0.12) | -1.75 (-1.94, -1.55) | -0.12 (-0.29, 0.06) | 5.56 (4.37, 6.77) | 1.29 (0.93, 1.64) |
| Samoa | -0.63 (-0.78, -0.47) | 0.53 (0.46, 0.59) | 0.03 (-0.10, 0.17) | 0.81 (0.76, 0.86) | 0.16 (0.11, 0.21) | 0.02 (-0.01, 0.06) |
| San Marino | -1.80 (-2.11, -1.49) | -0.65 (-0.97, -0.33) | -1.63 (-1.89, -1.37) | -1.46 (-1.71, -1.22) | -1.10 (-1.40, -0.79) | -0.97 (-1.45, -0.49) |
| Sao Tome and Principe | -1.20 (-1.48, -0.91) | 0.61 (0.52, 0.71) | -0.68 (-0.99, -0.37) | 1.38 (1.28, 1.47) | -0.92 (-1.13, -0.70) | 1.71 (1.57, 1.85) |
| Saudi Arabia | -1.51 (-1.66, -1.36) | 0.66 (0.45, 0.87) | -2.11 (-2.43, -1.79) | 0.72 (0.43, 1.02) | 0.59 (0.41, 0.77) | -0.38 (-0.68, -0.08) |
| Senegal | 1.31 (0.87, 1.75) | 1.29 (1.15, 1.42) | 0.24 (0.11, 0.37) | 2.00 (1.89, 2.11) | -1.25 (-1.38, -1.11) | 1.97 (1.85, 2.09) |
| Serbia | -3.78 (-4.08, -3.47) | -0.75 (-0.92, -0.59) | -1.96 (-2.22, -1.71) | 0.27 (0.20, 0.34) | -0.80 (-1.00, -0.60) | 0.14 (-0.07, 0.36) |
| Seychelles | -2.87 (-3.07, -2.67) | -0.26 (-0.40, -0.12) | -1.32 (-1.45, -1.19) | 1.14 (0.86, 1.42) | 0.03 (-0.14, 0.20) | 1.24 (0.90, 1.58) |
| Sierra Leone | 1.59 (1.06, 2.11) | 1.51 (1.33, 1.70) | 1.07 (0.75, 1.38) | 1.76 (1.68, 1.83) | -1.25 (-1.45, -1.04) | 1.62 (1.51, 1.74) |
| Singapore | -4.54 (-4.75, -4.34) | -1.09 (-1.26, -0.93) | -3.88 (-4.20, -3.56) | -1.45 (-1.66, -1.25) | -2.71 (-3.24, -2.19) | -0.46 (-0.72, -0.20) |
| Slovakia | -3.73 (-4.22, -3.24) | -0.93 (-0.99, -0.86) | -1.54 (-1.64, -1.45) | -0.39 (-0.53, -0.25) | -0.57 (-0.69, -0.44) | 0.27 (0.20, 0.33) |
| Slovenia | -7.18 (-7.88, -6.46) | -1.08 (-1.33, -0.82) | -2.56 (-2.82, -2.29) | -1.01 (-1.23, -0.79) | -1.87 (-2.25, -1.48) | 0.73 (0.46, 0.99) |
| Solomon Islands | -0.09 (-0.24, 0.06) | 1.14 (1.00, 1.28) | -0.01 (-0.14, 0.13) | 2.62 (2.53, 2.71) | 0.64 (0.59, 0.68) | 0.26 (0.22, 0.31) |
| Somalia | 0.12 (-0.02, 0.25) | 0.18 (0.11, 0.26) | -0.30 (-0.40, -0.20) | 0.90 (0.86, 0.94) | 0.10 (0.03, 0.17) | -0.78 (-0.82, -0.74) |
| South Africa | 1.06 (0.65, 1.47) | 1.84 (1.50, 2.17) | 1.64 (1.20, 2.09) | 1.61 (1.48, 1.74) | -0.04 (-0.12, 0.05) | 0.70 (0.56, 0.85) |
| South Sudan | -0.16 (-0.43, 0.11) | 0.52 (0.30, 0.75) | 0.17 (-0.13, 0.48) | 0.99 (0.82, 1.15) | -0.04 (-0.19, 0.11) | -0.17 (-0.24, -0.11) |
| Spain | -4.17 (-4.64, -3.70) | -0.57 (-0.70, -0.44) | -2.09 (-2.29, -1.90) | -0.84 (-0.99, -0.69) | -2.60 (-2.75, -2.45) | -1.96 (-2.10, -1.82) |
| Sri Lanka | -2.55 (-2.81, -2.29) | -0.31 (-0.49, -0.14) | -0.97 (-1.14, -0.79) | 1.67 (1.46, 1.88) | -0.93 (-1.06, -0.81) | -0.76 (-0.88, -0.65) |
| Sudan | -0.76 (-1.01, -0.51) | 0.52 (0.36, 0.67) | -1.70 (-1.78, -1.63) | 1.09 (0.91, 1.27) | 3.23 (2.95, 3.50) | 1.02 (0.97, 1.07) |
| Suriname | -1.23 (-1.47, -0.99) | 0.66 (0.46, 0.85) | -1.00 (-1.21, -0.78) | 0.62 (0.48, 0.76) | 3.21 (2.27, 4.14) | 0.49 (0.25, 0.73) |
| Sweden | -4.44 (-5.73, -3.14) | -0.61 (-0.75, -0.46) | -1.46 (-1.60, -1.31) | -2.01 (-2.27, -1.75) | -1.66 (-2.16, -1.15) | -1.10 (-1.36, -0.85) |
| Switzerland | -4.29 (-4.71, -3.87) | -1.03 (-1.28, -0.78) | -3.42 (-3.58, -3.26) | -0.94 (-1.42, -0.45) | -3.91 (-4.05, -3.76) | -2.06 (-2.28, -1.84) |
| Syrian Arab Republic | -0.54 (-0.69, -0.39) | -0.67 (-0.97, -0.37) | -1.69 (-1.98, -1.40) | 0.78 (0.64, 0.91) | -0.30 (-0.43, -0.17) | 0.61 (0.45, 0.78) |
| Taiwan (Province of China) | 1.25 (0.39, 2.12) | 2.48 (2.14, 2.82) | -4.68 (-5.08, -4.29) | 0.90 (0.65, 1.15) | -0.93 (-1.45, -0.40) | 1.34 (0.87, 1.82) |
| Tajikistan | -1.51 (-1.65, -1.37) | -1.10 (-1.23, -0.96) | -2.15 (-2.30, -2.00) | -0.42 (-0.54, -0.31) | -1.11 (-1.24, -0.98) | -0.99 (-1.27, -0.70) |
| Thailand | -2.48 (-2.70, -2.25) | -0.53 (-0.72, -0.34) | -2.45 (-2.68, -2.22) | 0.59 (0.47, 0.70) | 1.29 (1.20, 1.38) | -0.11 (-0.24, 0.02) |
| Timor-Leste | -0.69 (-0.73, -0.65) | 0.22 (0.05, 0.40) | -0.87 (-1.14, -0.59) | 2.04 (1.85, 2.23) | 0.43 (0.24, 0.62) | 0.96 (0.87, 1.06) |
| Togo | 1.09 (0.65, 1.54) | 1.33 (1.24, 1.42) | 0.37 (0.26, 0.49) | 1.68 (1.64, 1.71) | -1.84 (-2.06, -1.62) | 1.24 (1.11, 1.38) |
| Tokelau | -2.29 (-2.62, -1.97) | -0.03 (-0.09, 0.02) | -1.64 (-1.69, -1.60) | 1.12 (1.04, 1.21) | 0.45 (0.36, 0.54) | 0.33 (0.22, 0.43) |
| Tonga | -1.06 (-1.22, -0.89) | 0.44 (0.40, 0.48) | -0.66 (-0.73, -0.58) | 1.34 (1.23, 1.45) | 0.65 (0.55, 0.74) | 0.06 (-0.03, 0.15) |
| Trinidad and Tobago | -2.12 (-2.48, -1.75) | 0.16 (-0.09, 0.41) | -1.79 (-2.00, -1.58) | -0.29 (-0.43, -0.14) | 4.39 (2.96, 5.85) | -0.53 (-0.80, -0.25) |
| Tunisia | -0.04 (-0.35, 0.27) | 0.09 (0.04, 0.14) | -1.47 (-1.54, -1.40) | 0.88 (0.81, 0.94) | -0.16 (-0.21, -0.12) | -0.17 (-0.29, -0.04) |
| Turkey | -2.67 (-2.79, -2.55) | -0.57 (-0.97, -0.17) | -2.51 (-2.77, -2.25) | 0.01 (-0.14, 0.17) | -0.91 (-1.17, -0.64) | -0.81 (-1.07, -0.56) |
| Turkmenistan | -1.23 (-1.34, -1.12) | -1.52 (-2.23, -0.80) | 0.05 (-0.28, 0.38) | 3.27 (1.05, 5.53) | 1.46 (0.58, 2.36) | 1.06 (0.72, 1.40) |
| Tuvalu | -2.57 (-2.75, -2.39) | -0.00 (-0.04, 0.04) | -1.70 (-1.78, -1.62) | 1.42 (1.29, 1.54) | 1.14 (1.02, 1.26) | 1.21 (1.05, 1.36) |
| Uganda | -0.37 (-0.56, -0.18) | 0.80 (0.54, 1.07) | -0.97 (-1.28, -0.66) | 1.31 (1.07, 1.54) | 0.22 (0.04, 0.40) | -0.19 (-0.31, -0.07) |
| Ukraine | -0.96 (-1.20, -0.73) | -0.48 (-1.51, 0.56) | -3.80 (-4.16, -3.44) | 0.16 (-0.09, 0.41) | 0.03 (-0.16, 0.22) | 0.35 (0.15, 0.55) |
| United Arab Emirates | 0.40 (-0.20, 1.01) | 2.01 (1.33, 2.70) | -0.39 (-0.97, 0.19) | 2.60 (1.97, 3.23) | 1.17 (0.88, 1.46) | 2.94 (2.37, 3.52) |
| United Kingdom | -3.92 (-4.30, -3.54) | 1.49 (1.15, 1.85) | -3.03 (-3.31, -2.75) | -1.70 (-1.85, -1.55) | -3.13 (-3.44, -2.82) | -0.47 (-0.55, -0.38) |
| United Republic of Tanzania | -1.60 (-1.68, -1.52) | -0.06 (-0.11, -0.00) | -1.17 (-1.25, -1.10) | 0.88 (0.82, 0.94) | 0.34 (0.24, 0.44) | -0.50 (-0.58, -0.42) |
| United States Virgin Islands | -2.29 (-2.73, -1.84) | -1.50 (-1.71, -1.28) | -2.88 (-3.06, -2.70) | 0.20 (-0.19, 0.60) | 4.90 (4.50, 5.30) | -1.41 (-1.84, -0.98) |
| United States of America | 0.06 (-0.13, 0.25) | 0.52 (0.37, 0.68) | -1.16 (-1.27, -1.05) | -1.51 (-1.70, -1.32) | -0.31 (-0.45, -0.17) | -1.83 (-1.99, -1.68) |
| Uruguay | -2.40 (-3.38, -1.40) | -0.98 (-1.08, -0.87) | -0.83 (-1.06, -0.60) | -0.11 (-0.22, 0.00) | 0.41 (0.24, 0.59) | -0.48 (-0.76, -0.20) |
| Uzbekistan | -0.24 (-0.61, 0.12) | -0.67 (-1.00, -0.35) | -0.48 (-0.73, -0.23) | 0.97 (0.66, 1.29) | 1.73 (1.33, 2.12) | 0.71 (-0.10, 1.53) |
| Vanuatu | -1.01 (-1.25, -0.77) | 0.92 (0.83, 1.01) | -0.42 (-0.52, -0.32) | 1.92 (1.84, 2.01) | 0.38 (0.30, 0.47) | 0.36 (0.30, 0.41) |
| Venezuela (Bolivarian Republic of) | -2.57 (-3.19, -1.95) | -0.74 (-1.11, -0.37) | -1.26 (-1.57, -0.94) | 3.29 (2.13, 4.46) | 3.16 (2.50, 3.83) | 0.34 (-0.04, 0.72) |
| Viet Nam | -2.86 (-2.99, -2.73) | 0.02 (-0.01, 0.06) | -0.80 (-0.93, -0.68) | 1.31 (1.24, 1.39) | -0.03 (-0.13, 0.06) | 0.86 (0.72, 0.99) |
| Yemen | -0.18 (-0.51, 0.14) | 0.44 (0.29, 0.60) | -1.28 (-1.38, -1.17) | 1.88 (1.69, 2.06) | 3.37 (3.02, 3.72) | 1.75 (1.65, 1.84) |
| Zambia | -1.31 (-1.38, -1.23) | 0.75 (0.53, 0.98) | -1.29 (-1.51, -1.07) | 1.13 (1.00, 1.26) | 5.70 (4.72, 6.69) | 1.61 (1.32, 1.90) |
| Zimbabwe | 1.38 (1.04, 1.72) | 2.87 (2.20, 3.53) | 2.49 (1.65, 3.33) | 2.35 (1.90, 2.80) | 1.59 (1.29, 1.89) | 1.11 (0.80, 1.43) |

The location name is in alphabetical order. EAPC estimated annual percentage change, ASMR age-standardized mortality rate, CI confidence interval.

**Table S8. EAPC of ASDR for 6 genital neoplasms in 204 countries and territories (1990-2021, 95% CI)**

| Location name | Uterine fibroids | Uterine cancer | Cervical cancer | Ovarian cancer | Testicular cancer | Prostate cancer |
| --- | --- | --- | --- | --- | --- | --- |
| Afghanistan | -0.21 (-0.60, 0.17) | 1.29 (1.19, 1.39) | -1.09 (-1.26, -0.92) | 1.68 (1.53, 1.84) | 3.73 (3.43, 4.03) | 0.08 (0.05, 0.10) |
| Albania | -2.46 (-2.81, -2.12) | -0.38 (-0.59, -0.17) | -1.02 (-1.25, -0.79) | 0.64 (0.45, 0.83) | -0.13 (-0.31, 0.05) | 0.10 (-0.02, 0.22) |
| Algeria | -0.22 (-0.32, -0.12) | 0.13 (0.05, 0.20) | -2.26 (-2.43, -2.08) | 0.58 (0.54, 0.62) | -0.43 (-0.68, -0.17) | 0.17 (0.01, 0.34) |
| American Samoa | 0.22 (-0.30, 0.74) | 1.27 (1.19, 1.35) | 0.36 (0.23, 0.49) | 1.81 (1.70, 1.91) | 3.83 (2.77, 4.91) | 0.65 (0.45, 0.86) |
| Andorra | -0.12 (-0.20, -0.05) | -0.51 (-0.70, -0.32) | -1.45 (-1.64, -1.26) | -0.83 (-1.00, -0.65) | -1.01 (-1.13, -0.89) | -0.61 (-0.80, -0.41) |
| Angola | -0.06 (-0.17, 0.05) | 0.29 (0.20, 0.38) | -0.81 (-0.92, -0.69) | 2.20 (2.06, 2.33) | 0.66 (0.49, 0.84) | 0.28 (0.21, 0.35) |
| Antigua and Barbuda | -1.87 (-2.33, -1.41) | 1.31 (0.96, 1.65) | -0.88 (-1.09, -0.67) | 1.01 (0.85, 1.18) | 5.13 (3.84, 6.44) | 0.04 (-0.35, 0.43) |
| Argentina | -1.69 (-1.94, -1.44) | -1.42 (-1.56, -1.28) | -0.34 (-0.53, -0.14) | -0.62 (-0.77, -0.46) | 0.44 (0.24, 0.64) | -0.63 (-0.98, -0.28) |
| Armenia | 0.10 (-0.06, 0.26) | -0.07 (-0.65, 0.50) | -1.92 (-2.38, -1.46) | 0.85 (0.64, 1.06) | 0.70 (0.31, 1.09) | 1.64 (1.40, 1.87) |
| Australia | -1.59 (-2.20, -0.97) | 0.22 (-0.08, 0.53) | -2.97 (-3.22, -2.71) | -2.55 (-2.92, -2.18) | -1.89 (-2.09, -1.69) | -2.43 (-2.92, -1.94) |
| Austria | -1.50 (-1.69, -1.31) | -1.41 (-1.57, -1.25) | -3.12 (-3.39, -2.86) | -2.29 (-2.41, -2.18) | -2.09 (-2.29, -1.89) | -0.97 (-1.10, -0.84) |
| Azerbaijan | -0.19 (-0.26, -0.13) | -1.24 (-1.37, -1.10) | -2.20 (-2.39, -2.00) | 0.96 (0.60, 1.32) | 0.74 (0.56, 0.92) | 0.42 (0.20, 0.64) |
| Bahamas | -0.92 (-1.16, -0.69) | 1.09 (0.77, 1.42) | -1.09 (-1.23, -0.96) | 0.47 (0.35, 0.59) | 5.60 (4.45, 6.77) | 0.46 (0.27, 0.65) |
| Bahrain | -1.74 (-2.22, -1.26) | -0.72 (-1.02, -0.43) | -3.52 (-3.88, -3.17) | -0.44 (-0.57, -0.31) | -0.12 (-0.86, 0.63) | -0.50 (-0.75, -0.25) |
| Bangladesh | -1.49 (-1.85, -1.12) | -0.69 (-0.83, -0.55) | -2.17 (-2.37, -1.98) | 1.20 (1.12, 1.28) | -0.79 (-0.98, -0.60) | -0.91 (-1.07, -0.76) |
| Barbados | -1.01 (-1.07, -0.94) | 1.14 (0.65, 1.64) | -0.95 (-1.06, -0.85) | 0.24 (0.11, 0.38) | 2.80 (1.12, 4.51) | 0.26 (0.14, 0.39) |
| Belarus | -0.34 (-0.39, -0.28) | -0.40 (-1.12, 0.33) | -1.91 (-2.27, -1.56) | -0.07 (-0.62, 0.48) | -0.10 (-0.41, 0.22) | 1.57 (1.24, 1.90) |
| Belgium | -0.57 (-0.68, -0.47) | -0.48 (-0.61, -0.35) | -2.11 (-2.29, -1.93) | -2.34 (-2.45, -2.22) | -1.54 (-1.74, -1.35) | -1.94 (-2.21, -1.66) |
| Belize | -0.10 (-0.25, 0.05) | 0.80 (0.44, 1.17) | -0.24 (-0.63, 0.15) | 1.33 (0.99, 1.67) | 6.26 (4.62, 7.93) | 1.10 (0.27, 1.94) |
| Benin | 0.56 (0.15, 0.97) | 0.45 (0.37, 0.54) | -0.69 (-0.79, -0.58) | 1.03 (0.95, 1.11) | -1.88 (-2.11, -1.64) | 1.32 (1.24, 1.40) |
| Bermuda | -2.12 (-2.49, -1.75) | -1.38 (-1.73, -1.03) | -3.35 (-3.70, -3.01) | -1.49 (-1.71, -1.27) | 4.20 (3.22, 5.20) | -0.45 (-0.60, -0.29) |
| Bhutan | -0.81 (-0.90, -0.72) | -0.56 (-0.71, -0.42) | -2.73 (-3.00, -2.46) | 1.17 (1.11, 1.23) | -0.06 (-0.16, 0.04) | 0.22 (0.18, 0.27) |
| Bolivia (Plurinational State of) | -1.69 (-1.82, -1.57) | -0.61 (-0.69, -0.52) | -2.06 (-2.20, -1.92) | 1.95 (1.79, 2.12) | 1.58 (1.33, 1.83) | 0.18 (0.12, 0.24) |
| Bosnia and Herzegovina | -1.91 (-2.19, -1.63) | 0.26 (0.10, 0.41) | -0.94 (-1.13, -0.76) | 0.77 (0.62, 0.93) | -0.64 (-0.95, -0.32) | 1.43 (1.25, 1.61) |
| Botswana | -0.79 (-1.09, -0.49) | 0.98 (0.54, 1.43) | -0.45 (-1.03, 0.13) | 1.45 (1.24, 1.65) | 0.10 (-0.00, 0.21) | -0.04 (-0.24, 0.15) |
| Brazil | 1.24 (1.12, 1.35) | -0.61 (-0.76, -0.46) | -1.64 (-1.79, -1.50) | 0.01 (-0.10, 0.12) | 1.50 (1.31, 1.69) | -0.29 (-0.63, 0.04) |
| Brunei Darussalam | -0.24 (-0.42, -0.07) | 0.36 (0.17, 0.56) | -1.40 (-1.69, -1.12) | 0.42 (0.34, 0.50) | -0.47 (-0.65, -0.29) | 0.04 (-0.11, 0.19) |
| Bulgaria | -1.57 (-1.84, -1.30) | 1.24 (0.85, 1.64) | -0.25 (-0.48, -0.02) | 0.83 (0.56, 1.10) | 0.10 (-0.33, 0.53) | 0.91 (0.75, 1.07) |
| Burkina Faso | -0.81 (-0.92, -0.70) | 0.38 (0.28, 0.49) | -0.83 (-0.92, -0.74) | 1.08 (0.98, 1.18) | -1.50 (-1.77, -1.24) | 1.75 (1.65, 1.85) |
| Burundi | -0.46 (-0.54, -0.37) | -1.82 (-2.01, -1.63) | -2.93 (-3.20, -2.65) | -0.50 (-0.63, -0.37) | 0.39 (0.21, 0.57) | -0.11 (-0.21, -0.01) |
| Cabo Verde | 1.92 (0.54, 3.32) | 0.20 (0.07, 0.33) | -1.81 (-1.94, -1.68) | 3.97 (3.16, 4.79) | 0.37 (0.30, 0.45) | 1.93 (1.50, 2.36) |
| Cambodia | -0.66 (-0.74, -0.59) | -0.17 (-0.23, -0.10) | -1.92 (-2.01, -1.83) | 2.33 (2.28, 2.38) | 1.05 (1.02, 1.07) | 0.86 (0.79, 0.93) |
| Cameroon | 0.26 (-0.17, 0.68) | 0.15 (0.11, 0.20) | -0.60 (-0.76, -0.44) | 1.15 (1.05, 1.24) | -1.61 (-1.79, -1.42) | 1.57 (1.48, 1.67) |
| Canada | -0.13 (-0.21, -0.04) | 0.18 (-0.10, 0.46) | -0.56 (-0.77, -0.34) | -0.96 (-1.14, -0.78) | 0.45 (0.15, 0.75) | -2.98 (-3.26, -2.69) |
| Central African Republic | -0.41 (-0.47, -0.35) | -0.09 (-0.16, -0.02) | -0.86 (-1.01, -0.72) | 0.65 (0.58, 0.73) | 0.12 (0.05, 0.19) | 0.07 (0.04, 0.09) |
| Chad | 0.79 (0.40, 1.18) | 0.72 (0.63, 0.81) | 0.20 (0.06, 0.34) | 1.04 (1.00, 1.09) | -0.84 (-1.08, -0.60) | 2.69 (2.51, 2.87) |
| Chile | -2.24 (-2.67, -1.81) | -0.66 (-0.90, -0.41) | -3.32 (-3.58, -3.07) | -0.07 (-0.40, 0.26) | 0.24 (-0.09, 0.57) | -0.27 (-0.55, 0.02) |
| China | 2.50 (1.89, 3.11) | -2.44 (-2.78, -2.10) | -1.00 (-1.16, -0.84) | -0.93 (-1.10, -0.75) | -1.91 (-2.27, -1.54) | -0.14 (-0.32, 0.05) |
| Colombia | -1.16 (-1.34, -0.97) | -0.23 (-0.68, 0.22) | -2.23 (-2.45, -2.01) | 0.50 (0.34, 0.66) | 1.32 (1.02, 1.63) | -1.50 (-1.78, -1.23) |
| Comoros | -1.00 (-1.13, -0.87) | -0.29 (-0.41, -0.18) | -1.62 (-1.82, -1.42) | 1.05 (0.93, 1.18) | 0.48 (-0.05, 1.01) | -0.08 (-0.15, -0.02) |
| Congo | -0.63 (-0.76, -0.50) | -0.28 (-0.42, -0.14) | -1.43 (-1.67, -1.20) | 1.04 (0.95, 1.13) | 0.67 (0.56, 0.77) | 0.43 (0.30, 0.57) |
| Cook Islands | -0.71 (-0.75, -0.67) | -0.19 (-0.37, -0.02) | -1.32 (-1.61, -1.03) | 1.29 (1.16, 1.41) | 0.21 (0.15, 0.27) | -0.55 (-0.64, -0.47) |
| Costa Rica | -0.80 (-1.00, -0.60) | 0.91 (0.48, 1.33) | -2.21 (-2.57, -1.85) | 1.51 (1.24, 1.79) | 1.95 (1.69, 2.22) | 0.70 (0.31, 1.10) |
| Croatia | -1.79 (-2.12, -1.46) | -0.09 (-0.52, 0.33) | -2.21 (-2.50, -1.91) | -0.55 (-0.77, -0.34) | -0.89 (-1.25, -0.52) | 0.26 (0.02, 0.50) |
| Cuba | -1.96 (-2.26, -1.65) | 0.65 (0.32, 0.98) | -1.45 (-1.61, -1.28) | 0.76 (0.52, 1.00) | 4.37 (3.22, 5.54) | 0.77 (0.68, 0.85) |
| Cyprus | -0.35 (-0.51, -0.18) | -1.02 (-1.12, -0.92) | -2.06 (-2.18, -1.93) | -0.72 (-0.89, -0.54) | -1.46 (-1.66, -1.26) | -1.46 (-1.64, -1.28) |
| Czechia | -1.48 (-1.79, -1.17) | -1.52 (-1.63, -1.42) | -3.04 (-3.14, -2.93) | -0.74 (-1.04, -0.43) | -0.73 (-1.12, -0.34) | -0.17 (-0.47, 0.13) |
| Côte d'Ivoire | 0.87 (0.50, 1.24) | 0.73 (0.57, 0.88) | -0.14 (-0.34, 0.05) | 1.11 (1.04, 1.19) | 0.06 (-0.15, 0.26) | 0.08 (0.01, 0.15) |
| Democratic People's Republic of Korea | 1.50 (1.17, 1.84) | -0.06 (-0.19, 0.08) | -0.08 (-0.20, 0.05) | 0.55 (0.50, 0.61) | -0.68 (-0.82, -0.55) | 0.75 (0.65, 0.84) |
| Democratic Republic of the Congo | -0.27 (-0.31, -0.22) | 0.29 (0.24, 0.34) | -0.39 (-0.46, -0.33) | 1.21 (0.99, 1.43) | 0.72 (0.51, 0.94) | -0.03 (-0.32, 0.27) |
| Denmark | -1.36 (-1.61, -1.10) | -1.57 (-1.68, -1.47) | -3.70 (-4.04, -3.37) | -2.10 (-2.62, -1.59) | -2.52 (-2.75, -2.28) | -0.58 (-0.84, -0.31) |
| Djibouti | -0.31 (-0.38, -0.23) | -0.11 (-0.18, -0.04) | -0.94 (-1.10, -0.77) | 0.59 (0.53, 0.66) | 0.58 (0.45, 0.71) | 0.50 (0.43, 0.58) |
| Dominica | -0.87 (-1.01, -0.72) | 0.21 (0.08, 0.33) | -1.18 (-1.32, -1.05) | -0.08 (-0.19, 0.02) | 4.99 (4.36, 5.62) | 0.42 (0.18, 0.65) |
| Dominican Republic | -0.08 (-0.26, 0.10) | 0.81 (0.67, 0.96) | -0.36 (-0.49, -0.23) | 1.06 (0.97, 1.16) | 0.66 (0.05, 1.28) | 0.23 (-0.12, 0.59) |
| Ecuador | -1.91 (-2.33, -1.49) | -1.36 (-2.08, -0.64) | -1.39 (-1.62, -1.16) | 6.46 (4.55, 8.39) | 5.05 (2.92, 7.21) | -0.09 (-0.52, 0.35) |
| Egypt | -1.08 (-1.22, -0.95) | 0.20 (0.09, 0.30) | 1.54 (1.07, 2.01) | 3.09 (2.56, 3.63) | 1.62 (1.43, 1.81) | 2.79 (2.47, 3.11) |
| El Salvador | -1.08 (-1.20, -0.95) | 0.24 (0.07, 0.42) | -0.92 (-1.20, -0.62) | 2.27 (2.05, 2.49) | 1.75 (1.63, 1.88) | 0.39 (0.13, 0.64) |
| Equatorial Guinea | -1.70 (-1.81, -1.60) | 0.41 (0.28, 0.53) | -1.85 (-2.03, -1.67) | 2.29 (2.13, 2.45) | 1.62 (1.51, 1.72) | 0.78 (0.64, 0.91) |
| Eritrea | -0.74 (-0.82, -0.66) | 0.22 (0.17, 0.27) | -0.91 (-0.98, -0.83) | 1.21 (1.08, 1.33) | 1.09 (1.01, 1.17) | 0.12 (0.02, 0.23) |
| Estonia | -1.70 (-1.83, -1.56) | -1.25 (-1.43, -1.07) | -2.92 (-3.08, -2.75) | -1.37 (-2.18, -0.56) | -2.86 (-3.09, -2.62) | 2.02 (1.34, 2.70) |
| Eswatini | 0.11 (-0.24, 0.46) | 1.47 (0.91, 2.03) | 1.87 (0.90, 2.85) | 1.34 (1.17, 1.50) | 0.73 (0.58, 0.88) | 0.60 (0.31, 0.89) |
| Ethiopia | -1.24 (-1.45, -1.02) | -1.59 (-1.80, -1.37) | -3.72 (-4.00, -3.44) | 0.99 (0.83, 1.15) | 0.59 (0.49, 0.70) | -0.24 (-0.30, -0.18) |
| Fiji | 0.58 (0.31, 0.84) | 0.77 (0.63, 0.92) | -0.74 (-0.93, -0.54) | 0.36 (0.27, 0.46) | 0.92 (0.46, 1.39) | 0.06 (-0.11, 0.23) |
| Finland | -1.29 (-1.54, -1.03) | -0.61 (-0.70, -0.51) | -2.28 (-2.55, -2.00) | -1.80 (-1.95, -1.65) | -1.19 (-1.40, -0.97) | -0.86 (-1.09, -0.62) |
| France | -1.10 (-1.20, -1.00) | -0.29 (-0.45, -0.13) | -1.82 (-1.96, -1.69) | -1.54 (-1.64, -1.43) | -0.79 (-1.01, -0.58) | -1.79 (-1.97, -1.60) |
| Gabon | -0.28 (-0.37, -0.19) | -0.16 (-0.40, 0.09) | -1.13 (-1.41, -0.84) | 0.82 (0.75, 0.89) | 0.18 (0.07, 0.29) | 0.39 (0.36, 0.41) |
| Gambia | 1.28 (0.85, 1.72) | 1.05 (0.85, 1.24) | 0.25 (0.02, 0.49) | 1.62 (1.39, 1.85) | -0.15 (-0.50, 0.20) | 0.49 (0.37, 0.61) |
| Georgia | 1.47 (1.20, 1.75) | -0.39 (-0.85, 0.07) | -0.44 (-1.02, 0.15) | 5.84 (5.42, 6.26) | 0.74 (0.09, 1.40) | 4.11 (3.39, 4.84) |
| Germany | -1.06 (-1.29, -0.83) | -1.50 (-1.81, -1.19) | -2.70 (-3.12, -2.28) | -2.16 (-2.28, -2.04) | -1.97 (-2.24, -1.69) | -0.57 (-0.78, -0.36) |
| Ghana | -0.51 (-0.57, -0.46) | 1.21 (1.15, 1.27) | -0.32 (-0.38, -0.27) | 2.04 (1.99, 2.09) | -1.36 (-1.55, -1.18) | -0.31 (-0.46, -0.15) |
| Greece | -0.04 (-0.05, -0.02) | 0.76 (0.52, 1.01) | -1.52 (-1.78, -1.25) | -0.52 (-0.69, -0.35) | -0.57 (-0.77, -0.37) | -1.28 (-1.57, -0.99) |
| Greenland | -0.86 (-0.95, -0.77) | -1.89 (-2.02, -1.75) | -3.19 (-3.37, -3.01) | -1.67 (-1.87, -1.47) | -3.34 (-3.94, -2.73) | -0.33 (-0.43, -0.23) |
| Grenada | -1.16 (-1.61, -0.70) | 0.56 (0.34, 0.78) | -1.14 (-1.47, -0.82) | 1.00 (0.85, 1.16) | 5.95 (4.86, 7.04) | 0.50 (-0.55, 1.56) |
| Guam | -0.58 (-0.72, -0.44) | 0.19 (-0.24, 0.63) | -0.91 (-1.25, -0.56) | 2.34 (1.90, 2.78) | 3.67 (3.02, 4.33) | -0.31 (-0.55, -0.06) |
| Guatemala | -2.20 (-2.89, -1.50) | -0.67 (-0.94, -0.40) | -0.12 (-0.68, 0.44) | 3.04 (2.61, 3.48) | 2.12 (1.70, 2.54) | 0.69 (-0.04, 1.42) |
| Guinea | 0.84 (0.44, 1.24) | 0.27 (0.19, 0.34) | -0.51 (-0.59, -0.44) | 0.92 (0.88, 0.96) | 0.48 (0.40, 0.57) | 1.05 (1.02, 1.09) |
| Guinea-Bissau | 0.65 (0.23, 1.07) | 0.78 (0.70, 0.86) | 0.00 (-0.08, 0.09) | 1.56 (1.51, 1.61) | -1.30 (-1.49, -1.12) | 1.41 (1.32, 1.51) |
| Guyana | -0.03 (-0.23, 0.17) | 1.15 (0.75, 1.56) | -0.88 (-1.14, -0.61) | 1.59 (1.20, 1.98) | 5.96 (4.55, 7.39) | 0.50 (0.22, 0.77) |
| Haiti | -0.85 (-0.92, -0.77) | 0.18 (0.09, 0.26) | -1.36 (-1.44, -1.29) | 1.00 (0.91, 1.08) | 2.26 (2.05, 2.48) | 0.60 (0.51, 0.70) |
| Honduras | -0.65 (-0.69, -0.61) | 1.47 (1.29, 1.65) | -0.03 (-0.24, 0.19) | 1.48 (1.34, 1.61) | -0.02 (-0.10, 0.06) | 1.23 (1.12, 1.35) |
| Hungary | -3.77 (-4.38, -3.16) | -1.41 (-1.76, -1.06) | -2.12 (-2.30, -1.94) | -0.67 (-0.92, -0.42) | -1.27 (-1.56, -0.98) | -0.80 (-1.02, -0.59) |
| Iceland | -1.18 (-1.45, -0.91) | -0.43 (-0.55, -0.31) | -2.73 (-3.10, -2.35) | -2.03 (-2.21, -1.85) | -1.17 (-1.44, -0.91) | -1.15 (-1.32, -0.97) |
| India | -0.27 (-0.38, -0.17) | 0.06 (-0.16, 0.28) | -2.10 (-2.43, -1.76) | 1.29 (1.19, 1.40) | -0.72 (-0.92, -0.52) | -0.09 (-0.28, 0.09) |
| Indonesia | -0.84 (-0.97, -0.71) | 0.16 (0.03, 0.28) | -1.09 (-1.25, -0.92) | 0.81 (0.69, 0.93) | 0.88 (0.82, 0.95) | 1.32 (1.26, 1.38) |
| Iran (Islamic Republic of) | -1.48 (-1.69, -1.27) | 0.94 (0.52, 1.35) | -2.14 (-2.26, -2.03) | 1.93 (1.76, 2.11) | 4.72 (3.85, 5.61) | 0.95 (0.82, 1.07) |
| Iraq | -0.89 (-1.03, -0.76) | 0.87 (0.70, 1.03) | -1.23 (-1.33, -1.13) | 1.11 (1.02, 1.21) | 0.70 (0.63, 0.77) | 0.97 (0.77, 1.17) |
| Ireland | -1.00 (-1.15, -0.84) | 0.26 (-0.15, 0.68) | -2.93 (-3.37, -2.48) | -1.74 (-1.89, -1.58) | -1.14 (-1.34, -0.93) | -1.76 (-2.09, -1.43) |
| Israel | -0.99 (-1.09, -0.89) | 0.04 (-0.18, 0.27) | -1.94 (-2.07, -1.82) | -1.82 (-1.99, -1.65) | -1.32 (-1.68, -0.95) | -2.28 (-2.68, -1.88) |
| Italy | -1.27 (-1.48, -1.06) | 3.30 (2.55, 4.06) | 1.77 (1.11, 2.43) | -0.84 (-0.96, -0.72) | 0.56 (0.24, 0.89) | -1.18 (-1.37, -0.99) |
| Jamaica | 0.01 (-0.20, 0.21) | 2.01 (1.55, 2.46) | -0.98 (-1.31, -0.65) | 0.53 (0.32, 0.74) | 4.29 (2.87, 5.74) | 1.69 (0.94, 2.46) |
| Japan | -0.12 (-0.22, -0.02) | 1.02 (0.87, 1.17) | -0.23 (-0.32, -0.13) | -0.70 (-0.79, -0.61) | -1.75 (-2.11, -1.40) | 0.30 (0.04, 0.56) |
| Jordan | -0.95 (-1.06, -0.85) | -1.05 (-1.44, -0.65) | -3.95 (-4.47, -3.43) | 0.29 (-0.04, 0.61) | 1.87 (1.44, 2.31) | 0.34 (0.23, 0.46) |
| Kazakhstan | 0.37 (0.15, 0.58) | -1.64 (-2.20, -1.07) | -1.32 (-1.86, -0.79) | -0.11 (-0.42, 0.20) | -0.13 (-0.39, 0.13) | 0.60 (0.29, 0.90) |
| Kenya | -0.35 (-0.42, -0.28) | 1.40 (1.23, 1.57) | 0.15 (-0.06, 0.36) | 1.78 (1.71, 1.86) | 1.12 (1.04, 1.21) | 1.51 (1.32, 1.69) |
| Kiribati | -0.26 (-0.40, -0.13) | 0.61 (0.57, 0.65) | -0.22 (-0.28, -0.15) | 1.65 (1.48, 1.82) | 0.70 (0.62, 0.78) | 0.22 (0.16, 0.28) |
| Kuwait | -1.00 (-1.42, -0.57) | 3.01 (2.42, 3.61) | -3.84 (-4.46, -3.21) | -0.78 (-1.12, -0.44) | -1.11 (-3.22, 1.05) | 1.87 (1.12, 2.63) |
| Kyrgyzstan | 0.31 (0.12, 0.50) | -0.97 (-1.29, -0.65) | -1.27 (-1.50, -1.04) | 3.22 (2.52, 3.92) | -1.32 (-1.72, -0.91) | -0.20 (-0.44, 0.04) |
| Lao People's Democratic Republic | -1.13 (-1.24, -1.03) | -0.75 (-0.83, -0.66) | -2.67 (-2.75, -2.58) | 1.89 (1.80, 1.97) | 0.46 (0.43, 0.48) | 0.54 (0.49, 0.59) |
| Latvia | -1.26 (-1.35, -1.18) | 0.55 (0.27, 0.84) | -2.16 (-2.37, -1.95) | 0.42 (0.03, 0.81) | -0.64 (-1.00, -0.28) | 2.48 (2.16, 2.81) |
| Lebanon | -0.43 (-0.45, -0.40) | -0.76 (-0.84, -0.67) | -3.41 (-3.50, -3.32) | 0.70 (0.52, 0.89) | 2.54 (2.33, 2.75) | 1.35 (0.99, 1.71) |
| Lesotho | 0.72 (0.44, 1.00) | 3.20 (2.61, 3.79) | 3.86 (3.01, 4.71) | 2.11 (1.87, 2.34) | 1.87 (1.78, 1.97) | 1.36 (1.28, 1.44) |
| Liberia | 0.73 (0.40, 1.06) | 1.02 (0.83, 1.21) | 0.03 (-0.12, 0.17) | 1.87 (1.75, 1.99) | -1.14 (-1.32, -0.96) | 1.44 (1.34, 1.53) |
| Libya | 1.32 (1.08, 1.57) | 1.34 (1.18, 1.51) | 0.04 (-0.07, 0.15) | 1.63 (1.45, 1.80) | 0.57 (0.42, 0.72) | 0.49 (0.39, 0.58) |
| Lithuania | -1.88 (-2.15, -1.62) | 0.29 (0.05, 0.54) | -1.68 (-1.96, -1.39) | -0.70 (-1.20, -0.21) | 0.17 (-0.22, 0.57) | 2.42 (1.87, 2.97) |
| Luxembourg | -0.66 (-0.78, -0.54) | -0.85 (-1.12, -0.59) | -3.03 (-3.24, -2.81) | -1.90 (-2.07, -1.74) | -3.52 (-3.69, -3.35) | -1.62 (-1.72, -1.51) |
| Madagascar | -0.34 (-0.36, -0.32) | -0.26 (-0.37, -0.15) | -1.02 (-1.11, -0.94) | 0.49 (0.31, 0.67) | 0.21 (0.08, 0.34) | -0.81 (-0.98, -0.63) |
| Malawi | -0.31 (-0.36, -0.25) | 0.20 (0.10, 0.30) | -0.25 (-0.61, 0.11) | 1.45 (1.36, 1.53) | 1.19 (1.15, 1.24) | 0.74 (0.62, 0.87) |
| Malaysia | 0.59 (0.32, 0.87) | -0.03 (-0.14, 0.09) | -1.36 (-1.75, -0.97) | 1.10 (0.76, 1.45) | 0.01 (-0.20, 0.22) | 0.45 (0.32, 0.58) |
| Maldives | -2.36 (-2.44, -2.28) | -2.82 (-2.98, -2.67) | -5.73 (-5.88, -5.58) | 0.07 (-0.31, 0.45) | 0.72 (0.49, 0.96) | -1.49 (-1.62, -1.37) |
| Mali | 0.43 (0.04, 0.82) | -0.16 (-0.23, -0.10) | -1.33 (-1.41, -1.25) | 0.62 (0.58, 0.67) | 0.25 (0.10, 0.41) | 0.79 (0.71, 0.86) |
| Malta | -0.42 (-0.56, -0.28) | -0.41 (-0.58, -0.25) | -2.22 (-2.69, -1.75) | -1.31 (-1.48, -1.14) | -0.82 (-1.07, -0.57) | -1.69 (-1.87, -1.51) |
| Marshall Islands | -0.35 (-0.52, -0.18) | 0.95 (0.78, 1.12) | -0.29 (-0.49, -0.08) | 1.81 (1.71, 1.91) | 0.69 (0.63, 0.75) | 1.45 (1.32, 1.57) |
| Mauritania | 0.37 (-0.01, 0.75) | -0.11 (-0.23, 0.00) | -0.95 (-1.05, -0.85) | 1.17 (1.09, 1.25) | -1.99 (-2.16, -1.81) | 2.10 (2.00, 2.21) |
| Mauritius | -2.97 (-4.10, -1.83) | -1.37 (-2.08, -0.67) | -2.57 (-3.10, -2.04) | 1.20 (0.76, 1.64) | 2.64 (1.64, 3.64) | 0.51 (0.19, 0.82) |
| Mexico | -1.15 (-1.54, -0.76) | 1.30 (0.71, 1.89) | -3.56 (-3.74, -3.37) | 1.21 (1.15, 1.26) | 2.17 (1.88, 2.46) | -0.51 (-0.66, -0.36) |
| Micronesia (Federated States of) | -0.88 (-0.99, -0.78) | 0.55 (0.47, 0.63) | -0.78 (-0.86, -0.70) | 1.68 (1.56, 1.79) | 0.22 (0.20, 0.24) | 0.38 (0.36, 0.41) |
| Monaco | -0.45 (-0.51, -0.39) | 0.46 (0.31, 0.61) | -0.96 (-1.05, -0.88) | -0.92 (-0.98, -0.86) | -0.20 (-0.24, -0.16) | 0.25 (0.18, 0.32) |
| Mongolia | 0.25 (0.13, 0.37) | -0.77 (-0.96, -0.59) | -1.54 (-1.78, -1.31) | 0.64 (0.51, 0.78) | 0.39 (0.20, 0.58) | 1.31 (1.22, 1.41) |
| Montenegro | 0.09 (0.07, 0.11) | 0.25 (0.06, 0.44) | -0.81 (-1.22, -0.39) | 0.03 (-0.28, 0.33) | 0.91 (0.63, 1.19) | 0.98 (0.70, 1.26) |
| Morocco | -0.15 (-0.29, -0.02) | 0.91 (0.85, 0.96) | -0.66 (-0.76, -0.56) | 1.40 (1.35, 1.44) | -0.11 (-0.24, 0.03) | 0.78 (0.59, 0.97) |
| Mozambique | 0.20 (0.15, 0.24) | 0.74 (0.58, 0.90) | 0.35 (0.15, 0.54) | 1.24 (1.14, 1.34) | 1.64 (1.53, 1.76) | 0.50 (0.44, 0.55) |
| Myanmar | -0.47 (-0.58, -0.36) | -0.90 (-1.07, -0.74) | -2.93 (-3.14, -2.71) | 0.75 (0.66, 0.83) | 0.02 (-0.07, 0.11) | 0.27 (0.22, 0.31) |
| Namibia | -0.77 (-0.96, -0.58) | 0.30 (0.07, 0.53) | 0.86 (0.55, 1.17) | 0.86 (0.70, 1.01) | 0.08 (-0.07, 0.23) | 1.97 (1.75, 2.20) |
| Nauru | -0.20 (-0.47, 0.08) | 1.15 (1.01, 1.30) | 0.02 (-0.32, 0.36) | 1.96 (1.86, 2.07) | -0.28 (-0.29, -0.26) | -0.53 (-0.57, -0.49) |
| Nepal | -1.13 (-1.32, -0.95) | -0.17 (-0.56, 0.22) | -1.87 (-2.36, -1.37) | 1.47 (1.38, 1.56) | -0.69 (-0.87, -0.50) | 0.00 (-0.13, 0.14) |
| Netherlands | -1.22 (-1.36, -1.08) | -0.58 (-0.70, -0.46) | -2.07 (-2.20, -1.94) | -2.04 (-2.15, -1.94) | -1.16 (-1.29, -1.03) | -1.06 (-1.24, -0.88) |
| New Zealand | -1.20 (-1.59, -0.81) | 0.22 (0.03, 0.41) | -4.02 (-4.47, -3.58) | -2.42 (-2.61, -2.23) | -2.14 (-2.62, -1.66) | -1.57 (-1.75, -1.38) |
| Nicaragua | -1.34 (-1.53, -1.16) | 0.73 (0.55, 0.90) | -1.89 (-2.03, -1.75) | 1.94 (1.64, 2.24) | 1.98 (1.77, 2.19) | 0.21 (-0.14, 0.55) |
| Niger | 0.38 (-0.00, 0.77) | 0.49 (0.41, 0.57) | -0.31 (-0.39, -0.23) | 1.26 (1.20, 1.32) | -2.01 (-2.26, -1.76) | 1.75 (1.60, 1.90) |
| Nigeria | 1.10 (0.74, 1.46) | 1.05 (0.84, 1.26) | -0.23 (-0.30, -0.15) | 2.25 (1.98, 2.52) | 0.58 (0.41, 0.75) | 0.73 (0.60, 0.86) |
| Niue | -0.63 (-0.86, -0.41) | 0.34 (0.27, 0.42) | -1.19 (-1.32, -1.06) | 1.15 (1.08, 1.23) | 0.17 (0.09, 0.26) | 0.73 (0.61, 0.86) |
| North Macedonia | -0.42 (-0.46, -0.38) | 0.03 (-0.21, 0.27) | -1.66 (-2.04, -1.29) | 0.18 (-0.04, 0.41) | -0.40 (-0.56, -0.24) | 0.56 (0.30, 0.83) |
| Northern Mariana Islands | 0.16 (-0.16, 0.48) | 1.76 (1.51, 2.01) | -0.73 (-0.94, -0.52) | 3.09 (2.64, 3.54) | 1.67 (0.68, 2.67) | 0.86 (0.64, 1.08) |
| Norway | -1.46 (-2.02, -0.91) | -1.35 (-1.61, -1.10) | -2.59 (-2.94, -2.24) | -1.83 (-2.07, -1.58) | -2.15 (-2.94, -1.36) | -1.37 (-1.61, -1.12) |
| Oman | -0.83 (-0.93, -0.73) | 0.12 (-0.10, 0.34) | -2.96 (-3.12, -2.80) | 0.51 (0.15, 0.88) | 0.87 (0.41, 1.33) | 0.38 (0.07, 0.68) |
| Pakistan | -0.32 (-0.44, -0.21) | 0.87 (0.65, 1.09) | -0.49 (-0.75, -0.22) | 1.42 (1.26, 1.59) | 0.26 (0.13, 0.39) | 0.45 (0.26, 0.63) |
| Palau | -0.93 (-1.06, -0.80) | -0.12 (-0.24, -0.00) | -1.29 (-1.47, -1.10) | 0.36 (0.28, 0.45) | 0.37 (0.24, 0.49) | -0.29 (-0.33, -0.24) |
| Palestine | -0.77 (-0.84, -0.71) | -0.18 (-0.28, -0.08) | -2.23 (-2.37, -2.09) | 0.93 (0.86, 1.01) | 0.14 (-0.19, 0.47) | -0.33 (-0.48, -0.18) |
| Panama | -1.08 (-1.34, -0.82) | 1.51 (1.21, 1.81) | -2.60 (-2.84, -2.37) | 2.41 (2.06, 2.76) | 2.50 (2.07, 2.92) | 0.06 (-0.45, 0.57) |
| Papua New Guinea | -0.38 (-0.51, -0.24) | 0.26 (0.22, 0.31) | -0.93 (-0.98, -0.87) | 0.97 (0.89, 1.05) | 0.77 (0.66, 0.88) | 1.01 (0.95, 1.06) |
| Paraguay | 0.06 (-0.05, 0.18) | -0.16 (-0.27, -0.06) | -0.63 (-0.84, -0.42) | 1.34 (1.10, 1.58) | 2.10 (1.82, 2.38) | 1.46 (1.08, 1.83) |
| Peru | -1.76 (-2.13, -1.39) | -1.15 (-1.42, -0.87) | -1.62 (-1.92, -1.33) | 0.73 (0.58, 0.87) | -0.71 (-0.92, -0.49) | -0.23 (-0.36, -0.10) |
| Philippines | -0.93 (-0.99, -0.88) | 0.69 (0.61, 0.77) | 0.11 (0.04, 0.17) | 1.25 (1.22, 1.28) | -0.11 (-0.21, -0.02) | 0.22 (0.16, 0.27) |
| Poland | -2.80 (-3.14, -2.47) | 0.30 (0.10, 0.49) | -3.15 (-3.39, -2.91) | -0.54 (-0.73, -0.36) | -0.25 (-0.53, 0.04) | 0.97 (0.67, 1.27) |
| Portugal | -1.71 (-1.89, -1.52) | -0.78 (-0.94, -0.62) | -2.66 (-2.81, -2.50) | -1.30 (-1.48, -1.12) | -2.28 (-2.53, -2.03) | -1.55 (-1.78, -1.32) |
| Puerto Rico | -0.75 (-1.02, -0.47) | 0.71 (0.42, 0.99) | -1.38 (-1.59, -1.17) | 1.69 (1.04, 2.34) | 4.79 (3.73, 5.86) | -1.87 (-2.07, -1.67) |
| Qatar | -3.41 (-3.76, -3.06) | 0.27 (-0.16, 0.70) | -2.77 (-3.47, -2.07) | 0.27 (0.02, 0.52) | 5.93 (4.73, 7.14) | -0.52 (-0.86, -0.18) |
| Republic of Korea | -1.88 (-2.05, -1.71) | -3.31 (-3.84, -2.78) | -4.26 (-4.42, -4.09) | 0.15 (0.01, 0.28) | -2.27 (-2.77, -1.77) | 1.34 (1.05, 1.64) |
| Republic of Moldova | -1.80 (-1.99, -1.60) | -0.50 (-0.74, -0.26) | -1.38 (-1.60, -1.16) | -1.15 (-1.54, -0.76) | -0.88 (-1.16, -0.60) | 2.58 (2.01, 3.16) |
| Romania | -0.24 (-0.28, -0.20) | -0.41 (-0.65, -0.17) | -1.34 (-1.62, -1.06) | 0.21 (0.10, 0.33) | -0.48 (-0.69, -0.27) | 1.28 (1.15, 1.41) |
| Russian Federation | -1.10 (-1.22, -0.98) | -0.67 (-0.96, -0.39) | 0.13 (-0.01, 0.27) | -0.66 (-0.83, -0.49) | -1.16 (-1.63, -0.69) | 2.54 (2.36, 2.72) |
| Rwanda | -1.19 (-1.34, -1.05) | -1.87 (-2.18, -1.57) | -3.93 (-4.38, -3.48) | 0.68 (0.61, 0.76) | 0.37 (0.16, 0.58) | -0.91 (-1.08, -0.73) |
| Saint Kitts and Nevis | -2.10 (-2.32, -1.87) | -0.20 (-0.47, 0.07) | -2.97 (-3.30, -2.64) | -0.27 (-0.41, -0.14) | 4.11 (3.01, 5.22) | 0.98 (0.71, 1.25) |
| Saint Lucia | -1.19 (-1.37, -1.02) | -0.78 (-1.04, -0.53) | -2.66 (-2.90, -2.42) | -0.27 (-0.41, -0.12) | 5.27 (4.03, 6.51) | -0.25 (-0.53, 0.02) |
| Saint Vincent and the Grenadines | -0.07 (-0.45, 0.31) | -0.20 (-0.36, -0.03) | -1.65 (-1.85, -1.45) | 0.03 (-0.16, 0.22) | 5.42 (4.20, 6.66) | 1.09 (0.78, 1.40) |
| Samoa | -0.15 (-0.23, -0.07) | 0.61 (0.55, 0.68) | 0.17 (0.01, 0.32) | 0.85 (0.79, 0.91) | 0.19 (0.13, 0.25) | -0.09 (-0.15, -0.02) |
| San Marino | -0.05 (-0.11, 0.00) | -0.27 (-0.59, 0.06) | -1.27 (-1.55, -0.99) | -1.13 (-1.40, -0.87) | -0.66 (-0.93, -0.40) | -0.96 (-1.38, -0.55) |
| Sao Tome and Principe | -0.97 (-1.25, -0.69) | 0.60 (0.44, 0.76) | -0.87 (-1.26, -0.48) | 1.39 (1.25, 1.52) | -0.78 (-1.03, -0.53) | 1.42 (1.34, 1.49) |
| Saudi Arabia | -0.92 (-1.00, -0.83) | 0.98 (0.78, 1.19) | -1.93 (-2.22, -1.63) | 0.85 (0.57, 1.13) | 1.17 (0.93, 1.40) | 0.04 (-0.21, 0.28) |
| Senegal | 0.91 (0.59, 1.24) | 1.12 (0.97, 1.26) | -0.02 (-0.16, 0.11) | 1.90 (1.78, 2.02) | -1.10 (-1.25, -0.94) | 1.91 (1.78, 2.04) |
| Serbia | -1.16 (-1.22, -1.09) | -0.49 (-0.63, -0.35) | -1.91 (-2.18, -1.65) | 0.21 (0.12, 0.31) | -0.57 (-0.79, -0.35) | 0.31 (0.13, 0.48) |
| Seychelles | -0.58 (-0.60, -0.56) | -0.36 (-0.47, -0.24) | -1.46 (-1.59, -1.32) | 0.97 (0.75, 1.18) | 0.17 (-0.05, 0.38) | 1.17 (0.84, 1.51) |
| Sierra Leone | 1.10 (0.70, 1.50) | 1.49 (1.30, 1.68) | 1.03 (0.71, 1.35) | 1.73 (1.66, 1.80) | -1.06 (-1.27, -0.84) | 1.64 (1.51, 1.76) |
| Singapore | -1.60 (-1.75, -1.44) | -1.09 (-1.24, -0.95) | -4.10 (-4.43, -3.78) | -1.59 (-1.78, -1.40) | -1.89 (-2.50, -1.27) | -0.34 (-0.57, -0.12) |
| Slovakia | -0.73 (-0.85, -0.61) | -1.08 (-1.15, -1.01) | -1.69 (-1.80, -1.59) | -0.63 (-0.75, -0.50) | -0.18 (-0.32, -0.04) | 0.33 (0.28, 0.38) |
| Slovenia | -2.48 (-2.83, -2.14) | -1.15 (-1.44, -0.86) | -2.58 (-2.85, -2.32) | -1.29 (-1.52, -1.06) | -1.41 (-1.82, -0.99) | 0.74 (0.41, 1.06) |
| Solomon Islands | 0.16 (0.08, 0.23) | 1.19 (1.04, 1.35) | 0.04 (-0.09, 0.17) | 2.68 (2.58, 2.78) | 0.70 (0.62, 0.78) | 0.24 (0.20, 0.28) |
| Somalia | -0.22 (-0.30, -0.13) | -0.01 (-0.08, 0.06) | -0.50 (-0.60, -0.40) | 0.78 (0.74, 0.81) | 0.23 (0.16, 0.29) | -0.71 (-0.73, -0.68) |
| South Africa | 0.45 (0.17, 0.74) | 1.73 (1.43, 2.03) | 1.49 (1.02, 1.97) | 1.45 (1.32, 1.58) | 0.11 (0.00, 0.23) | 0.86 (0.71, 1.00) |
| South Sudan | -0.07 (-0.24, 0.10) | 0.55 (0.32, 0.77) | 0.16 (-0.18, 0.49) | 1.01 (0.83, 1.19) | 0.00 (-0.18, 0.19) | -0.42 (-0.48, -0.37) |
| Spain | -1.00 (-1.11, -0.90) | -0.52 (-0.67, -0.36) | -2.06 (-2.24, -1.88) | -1.10 (-1.23, -0.97) | -2.39 (-2.55, -2.23) | -1.82 (-1.96, -1.68) |
| Sri Lanka | -0.94 (-1.08, -0.80) | -0.48 (-0.66, -0.29) | -1.34 (-1.49, -1.19) | 1.40 (1.21, 1.59) | -0.61 (-0.75, -0.48) | -0.51 (-0.62, -0.41) |
| Sudan | -0.33 (-0.40, -0.25) | 0.63 (0.47, 0.79) | -1.77 (-1.84, -1.71) | 1.17 (0.99, 1.36) | 3.33 (3.07, 3.58) | 0.96 (0.91, 1.01) |
| Suriname | -0.42 (-0.53, -0.30) | 0.59 (0.40, 0.78) | -1.03 (-1.28, -0.79) | 0.51 (0.38, 0.63) | 3.22 (2.32, 4.14) | 0.48 (0.24, 0.72) |
| Sweden | -1.26 (-1.65, -0.87) | -0.72 (-0.85, -0.58) | -1.52 (-1.67, -1.38) | -2.37 (-2.64, -2.11) | -1.05 (-1.59, -0.51) | -1.29 (-1.58, -1.00) |
| Switzerland | -0.88 (-1.04, -0.73) | -0.98 (-1.21, -0.76) | -3.42 (-3.59, -3.26) | -1.43 (-1.90, -0.96) | -3.85 (-4.02, -3.68) | -2.11 (-2.24, -1.97) |
| Syrian Arab Republic | -0.32 (-0.46, -0.18) | -0.63 (-0.93, -0.33) | -1.89 (-2.22, -1.56) | 0.68 (0.54, 0.83) | -0.17 (-0.34, 0.01) | 0.42 (0.29, 0.55) |
| Taiwan (Province of China) | 0.77 (0.26, 1.28) | 2.70 (2.37, 3.04) | -4.88 (-5.29, -4.46) | 0.95 (0.71, 1.19) | -0.57 (-1.04, -0.09) | 1.26 (0.82, 1.70) |
| Tajikistan | 0.11 (0.05, 0.17) | -1.05 (-1.18, -0.93) | -2.31 (-2.47, -2.15) | -0.06 (-0.13, 0.00) | -0.35 (-0.46, -0.25) | -0.83 (-1.10, -0.55) |
| Thailand | -0.84 (-0.94, -0.74) | -0.37 (-0.58, -0.17) | -2.47 (-2.75, -2.20) | 0.76 (0.64, 0.88) | 1.30 (1.18, 1.43) | 0.11 (-0.00, 0.22) |
| Timor-Leste | -0.34 (-0.39, -0.29) | 0.20 (0.01, 0.40) | -0.98 (-1.28, -0.67) | 2.08 (1.86, 2.30) | 0.28 (-0.03, 0.59) | 0.85 (0.79, 0.91) |
| Togo | 0.78 (0.45, 1.11) | 1.09 (1.01, 1.18) | 0.06 (-0.05, 0.17) | 1.49 (1.45, 1.53) | -1.74 (-1.98, -1.50) | 1.34 (1.22, 1.46) |
| Tokelau | -1.21 (-1.43, -0.98) | -0.05 (-0.11, 0.02) | -1.67 (-1.75, -1.59) | 1.12 (1.02, 1.22) | 0.45 (0.34, 0.56) | 0.21 (0.14, 0.28) |
| Tonga | -0.46 (-0.52, -0.40) | 0.27 (0.23, 0.31) | -0.97 (-1.06, -0.88) | 1.22 (1.12, 1.32) | 0.69 (0.57, 0.81) | 0.06 (-0.02, 0.15) |
| Trinidad and Tobago | -1.59 (-1.89, -1.29) | 0.24 (-0.04, 0.51) | -1.56 (-1.79, -1.33) | -0.21 (-0.35, -0.06) | 4.87 (3.39, 6.37) | -0.54 (-0.79, -0.28) |
| Tunisia | -0.07 (-0.19, 0.05) | 0.11 (0.06, 0.16) | -1.64 (-1.72, -1.56) | 0.84 (0.77, 0.91) | 0.48 (0.42, 0.54) | 0.01 (-0.07, 0.09) |
| Turkey | -1.77 (-1.83, -1.70) | -0.74 (-1.10, -0.37) | -3.04 (-3.28, -2.79) | -0.22 (-0.36, -0.08) | -0.15 (-0.43, 0.13) | -0.57 (-0.77, -0.36) |
| Turkmenistan | -0.78 (-0.86, -0.71) | -1.36 (-2.05, -0.66) | 0.21 (-0.14, 0.56) | 3.40 (1.20, 5.65) | 1.46 (0.57, 2.37) | 1.26 (0.95, 1.58) |
| Tuvalu | -1.75 (-1.86, -1.64) | -0.03 (-0.09, 0.02) | -1.84 (-1.92, -1.76) | 1.34 (1.20, 1.49) | 0.87 (0.81, 0.94) | 0.98 (0.86, 1.10) |
| Uganda | -0.25 (-0.37, -0.13) | 0.67 (0.39, 0.96) | -1.10 (-1.43, -0.76) | 1.24 (0.98, 1.50) | 0.40 (0.21, 0.58) | -0.15 (-0.30, -0.00) |
| Ukraine | -0.48 (-0.60, -0.36) | -0.40 (-1.46, 0.68) | -3.65 (-4.02, -3.28) | 0.14 (-0.15, 0.42) | 0.05 (-0.16, 0.25) | 0.43 (0.28, 0.58) |
| United Arab Emirates | -0.57 (-0.99, -0.14) | 1.20 (0.64, 1.77) | -1.41 (-1.86, -0.97) | 1.72 (1.23, 2.21) | 0.70 (0.40, 1.00) | 2.31 (1.81, 2.81) |
| United Kingdom | -1.61 (-1.80, -1.42) | 1.51 (1.15, 1.87) | -3.02 (-3.31, -2.74) | -2.08 (-2.22, -1.94) | -2.71 (-2.99, -2.44) | -0.67 (-0.76, -0.59) |
| United Republic of Tanzania | -1.03 (-1.13, -0.94) | -0.15 (-0.22, -0.07) | -1.31 (-1.40, -1.23) | 0.84 (0.76, 0.92) | 0.48 (0.37, 0.59) | -0.52 (-0.59, -0.44) |
| United States Virgin Islands | -1.52 (-1.83, -1.21) | -1.30 (-1.49, -1.11) | -2.68 (-2.85, -2.51) | 0.44 (0.04, 0.84) | 6.00 (5.47, 6.52) | -1.66 (-2.09, -1.23) |
| United States of America | 0.42 (0.27, 0.58) | 0.87 (0.72, 1.03) | -1.17 (-1.29, -1.04) | -1.66 (-1.82, -1.50) | -0.09 (-0.23, 0.05) | -1.73 (-1.88, -1.59) |
| Uruguay | -0.96 (-1.28, -0.64) | -0.94 (-1.04, -0.83) | -0.90 (-1.12, -0.69) | -0.15 (-0.24, -0.05) | 0.69 (0.49, 0.89) | -0.52 (-0.82, -0.21) |
| Uzbekistan | -0.04 (-0.19, 0.12) | -0.43 (-0.68, -0.18) | -0.49 (-0.71, -0.26) | 1.11 (0.78, 1.43) | 1.75 (1.35, 2.16) | 0.61 (-0.18, 1.41) |
| Vanuatu | -0.29 (-0.44, -0.15) | 0.94 (0.83, 1.06) | -0.47 (-0.59, -0.35) | 1.94 (1.83, 2.05) | 0.35 (0.26, 0.43) | 0.36 (0.31, 0.41) |
| Venezuela (Bolivarian Republic of) | -1.82 (-2.24, -1.40) | -0.74 (-1.15, -0.34) | -1.13 (-1.45, -0.80) | 3.36 (2.17, 4.56) | 3.73 (3.00, 4.47) | 0.34 (-0.03, 0.72) |
| Viet Nam | -0.15 (-0.20, -0.11) | 0.13 (0.07, 0.20) | -1.17 (-1.26, -1.07) | 1.28 (1.21, 1.35) | -0.02 (-0.14, 0.11) | 0.93 (0.80, 1.05) |
| Yemen | 0.15 (0.01, 0.29) | 0.65 (0.51, 0.79) | -1.32 (-1.42, -1.21) | 2.00 (1.83, 2.17) | 3.20 (2.82, 3.58) | 1.40 (1.31, 1.50) |
| Zambia | -0.62 (-0.65, -0.58) | 0.54 (0.30, 0.78) | -1.59 (-1.82, -1.36) | 0.93 (0.80, 1.06) | 6.03 (4.99, 7.07) | 1.94 (1.59, 2.29) |
| Zimbabwe | 1.12 (0.83, 1.41) | 3.25 (2.49, 4.02) | 2.84 (1.89, 3.80) | 2.65 (2.13, 3.17) | 2.15 (1.71, 2.60) | 0.94 (0.62, 1.26) |

The location name is in alphabetical order. EAPC estimated annual percentage change, ASDR age-standardized disability-adjusted life years rate, CI confidence interval.

**Figure S1. The EPAC trend of ASPR for six types of genital neoplasms from 1990 to 2021.** EAPC estimated annual percentage change, ASPR age-standardized prevalence rate.

**Figure S2. The EPAC trend of ASMR for six types of genital neoplasms from 1990 to 2021.** EAPC estimated annual percentage change, ASMR age-standardized mortality rate.

**Figure S3. The EPAC trend of ASDR for six types of genital neoplasms from 1990 to 2021.** EAPC estimated annual percentage change, ASDR age-standardized disability-adjusted life years rate.

**Figure S4. The relationship between the ASPR (per 100,000 population) of six types of genital neoplasms and SDI in different regions in 1990 and 2021.** ASPR age-standardized prevalence rate, SDI socio-demographic index.

**Figure S5. The relationship between the ASMR (per 100,000 population) of six types of genital neoplasms and SDI in different regions in 1990 and 2021.** ASMR age-standardized mortality rate, SDI socio-demographic index.

**Figure S6. The impact of age, period, and birth cohort on the relative risk of prevalence for six types of genital neoplasms.** The changes in the prevalence rates for all age groups and age-standardized prevalence rates between 1990 and 2021 are presented. Local drifts indicate the annual percentage change (%/year) in prevalence rates for five-year age groups (from 10-14 to 85+ years). The figure annotates the net drift index and its 95% CI, which can be used to measure the rate of change in prevalence over time. The age effect represents the prevalence rates of tumors across different age groups. The period effect is expressed by the relative risk of prevalence (prevalence rate ratio), calculated as the age-specific rate ratio for each period compared to the reference period of 2000-2005. The cohort effect illustrates the changes in the prevalence rate ratios for different birth cohorts. The shaded areas represent the corresponding 95% CI for each point estimate. CI confidence intervals.

**Figure S7. The impact of age, period, and birth cohort on the relative risk of mortality for six types of genital neoplasms.** The changes in the mortality rates for all age groups and age-standardized mortality rates between 1990 and 2021 are presented. Local drifts indicate the annual percentage change (%/year) in mortality rates for five-year age groups (from 10-14 to 85+ years). The figure annotates the net drift index and its 95% CI, which can be used to measure the rate of change in mortality over time. The age effect represents the mortality rates of tumors across different age groups. The period effect is expressed by the relative risk of mortality (mortality rate ratio), calculated as the age-specific rate ratio for each period compared to the reference period of 2000-2005. The cohort effect illustrates the changes in the mortality rate ratios for different birth cohorts. The shaded areas represent the corresponding 95% CI for each point estimate. CI confidence intervals.

**Figure S8. The impact of age, period, and birth cohort on the relative risk of DALYs for six types of genital neoplasms.** The changes in the DALYs rates for all age groups and age-standardized DALYs rates between 1990 and 2021 are presented. Local drifts indicate the annual percentage change (%/year) in DALYs rates for five-year age groups (from 10-14 to 85+ years). The figure annotates the net drift index and its 95% CI, which can be used to measure the rate of change in DALYs over time. The age effect represents the DALYs rates of tumors across different age groups. The period effect is expressed by the relative risk of DALYs (DALYs rate ratio), calculated as the age-specific rate ratio for each period compared to the reference period of 2000-2005. The cohort effect illustrates the changes in the DALYs rate ratios for different birth cohorts. The shaded areas represent the corresponding 95% CI for each point estimate. DALYs disability-adjusted life years, CI confidence intervals.

**Figure S9. The changing trends and predictions of the prevalence numbers and ASPR of six types of genital neoplasms during the period from 1990 to 2035.** ASPR age-standardized prevalence rate.

**Figure S10. The changing trends and predictions of the DALYs numbers and ASDR of six types of genital neoplasms during the period from 1990 to 2035.** DALYs disability-adjusted life years, ASDR age-standardized disability-adjusted life years rate.
